# Supplementary material for: (Z)-α-Boryl-crotylboron reagents via Z-selective alkene isomerization and application to stereoselective syntheses of (E)-δ-boryl-syn-homoallylic alcohols
Source: Royal Society of Chemistry journal article supplement (doi:10.1039/c9sc00226j), 2019-01-01

# (*Z*)- $\alpha$ -Boryl-crotylboron Reagents via Z-Selective Alkene Isomerization and Application to Stereoselective Syntheses of (*E*)- $\delta$ -Boryl-*syn*-Homoallylic Alcohols

*Shang Gao, Jichao Chen and Ming Chen\**

Department of Chemistry and Biochemistry

Auburn University

E-mail: mzc0102@auburn.edu

Supporting Information: Experimental Procedures, Tabulated Spectroscopic Data,  $^1\text{H}$  and

$^{13}\text{C}$  Spectra of New Compounds

**General Experimental Details.** All reaction solvents were purified before use. Dichloromethane, 1,2-dichloroethane and toluene were purified by passing through a solvent column composed of activated A-1 alumina. Unless indicated otherwise, all reactions were conducted under an atmosphere of argon using flame-dried or oven-dried (120 °C) glassware. The term “concentrated under reduced pressure” refers to the removal of solvents and other volatile materials using a rotary evaporator with the water bath temperature below 30 °C, followed by the removal of residual solvents at high vacuum (< 0.2 mbar).

Proton nuclear magnetic resonance ( $^1\text{H}$  NMR) spectra were acquired on commercial instruments (400 and 600 MHz) at Auburn University NMR facility. Carbon-13 nuclear magnetic resonance ( $^{13}\text{C}$  NMR) spectra were acquired at 101 and 151 MHz. The proton signal for the residual non-deuterated solvent ( $\delta$  7.26 for  $\text{CHCl}_3$ ) was used as an internal reference for  $^1\text{H}$  NMR spectra. For  $^{13}\text{C}$  NMR spectra, chemical shifts are reported relative to the  $\delta$  77.36 resonance of  $\text{CHCl}_3$ . Coupling constants are reported in Hz. High-resolution mass spectra were recorded on a commercial high-resolution mass spectrometer via the Micro Mass/Analytical Facility operated by the College of Chemistry and Biochemistry, Auburn University.

Analytical thin layer chromatography (TLC) was performed on Kieselgel 60 F254 glass plates precoated with a 0.25 mm thickness of silica gel. The TLC plates were visualized with UV light and/or by staining with Hanessian solution (ceric sulfate and ammonium molybdate in aqueous sulfuric acid) or  $\text{KMnO}_4$ . Column chromatography was generally performed using Kieselgel 60 (230-400 mesh) silica gel, typically using a 50-100:1 weight ratio of silica gel to crude product.

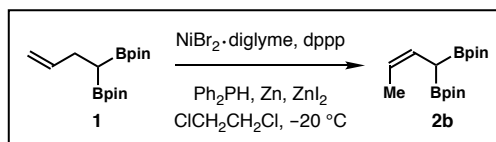

**(Z)-2,2'-(But-2-ene-1,1-diyl)-bis(4,4,5,5-tetramethyl-1,3,2-dioxaborolane) (2b):** In an Ar-filled glove box,  $\text{NiBr}_2 \cdot \text{diglyme}$  (7.0 mg, 0.02 mmol, 10 mol %), dppp (8.2 mg, 0.02 mmol, 10 mol %), zinc powder (2.6 mg, 0.04 mmol, 20 mol %), anhydrous zinc iodide (12.6 mg, 0.04 mmol, 20 mol %) and a Teflon-coated magnetic stirring bar were sequentially added into a reaction tube. The tube was capped with a rubber septum and removed from glove box. Anhydrous 1,2-dichloroethane (DCE, 0.3 mL) was added and the mixture was stirred for 10 min. Then  $\text{Ph}_2\text{PH}$  (1.9 mg, 0.01 mmol, 5 mol %) in 0.1 mL DCE were added to the reaction mixture. The reaction tube was placed in a cold bath and cooled to  $-20^\circ\text{C}$  and stirred stirring for 5 min. Then homoallylic boronate **1** (61.6 mg, 0.2 mmol, 1.0 equiv) was added and the reaction mixture was stirred at  $-20^\circ\text{C}$  for 12 h. After complete consumption of boronate **1**, diethyl ether (5 mL) was added and the resulting mixture was filtered through a pad of silica gel. The solvent was removed under reduced pressure. The *Z/E* ratio ( $> 20:1$ ) was determined by  $^1\text{H}$  NMR analysis of the crude reaction mixture. Purification of the crude product by flash chromatography (gradient elution with hexane and ethyl acetate) gave product **2b** in 70 % yield (43 mg) as a white solid. When the reaction was run in a 2-mmol scale, **2b** was isolated in 74% yield (456 mg, *Z/E*  $> 20:1$ ).  $^1\text{H}$  NMR (600 MHz,  $\text{CDCl}_3$ )  $\delta$  5.63 (ddq,  $J = 10.3, 10.2, 1.3$  Hz, 1H), 5.430 (dq,  $J = 10.3, 6.6$  Hz, 1H), 1.98 (d,  $J = 9.9$  Hz, 1H), 1.53 (dd,  $J = 6.6, 1.4$  Hz, 3H), 1.21 (s, 24H).  $^{13}\text{C}$  NMR (151 MHz,  $\text{CDCl}_3$ )  $\delta$  126.5, 122.5, 83.5, 25.0, 24.9, 13.1, 12.3. HRMS ( $\text{EI}^+$ ):  $m/z$  for  $\text{C}_{16}\text{H}_{30}\text{B}_2\text{O}_4$   $[\text{M}]^+$  calcd. 308.2330, found 308.2335.

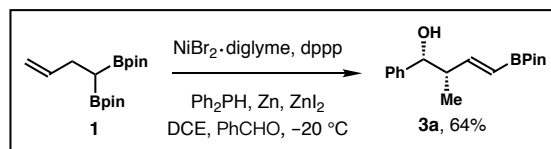

**Procedure for one-pot alkene isomerization and crotylboration with benzaldehyde from boronate 1:** The procedure for the synthesis of boronate **2b** was adopted. After the addition of homoallylic boronate **1** (92.4 mg, 0.3 mmol, 1.5 equiv), benzaldehyde (0.2 mmol, 1.0 equiv) was added to the reaction vessel and the reaction mixture was stirred at  $-20^\circ\text{C}$  for 24 h. After complete consumption of benzaldehyde, diethyl ether (5 mL) was added and the resulting mixture was filtered through a pad of silica gel. The solvent was removed under reduced pressure and the residue was purified by flash column

chromatography (gradient elution with n-hexane and ethyl acetate) to give product **3a** in 64 % yield (37 mg) as a colorless oil.

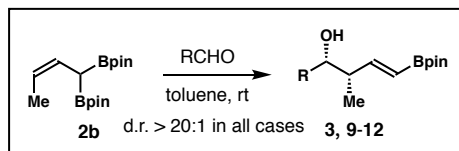

**General procedure for crotylboration of aldehydes with reagent 2b:** To a reaction flask containing a stirring bar was added freshly distilled aldehydes (0.1 mmol, 1.0 equiv, if it is a liquid). Toluene (0.3 mL) and crotylboronates **2b** (40 mg, 0.13 mmol, 1.3 equiv) were added to the flask. The reaction mixture was kept stirring for 12 h at ambient temperature. After complete consumption of the aldehyde, Et<sub>2</sub>O (2 mL) was added and the resulting mixture was filtered through a pad of silica gel. The solvent was removed under reduced pressure and the residue was purified by flash column chromatography (n-hexane/ethyl acetate) to give the homoallylic alcohol product.

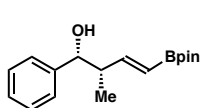

***rac*-(1*R*,2*S*,*E*)-2-Methyl-1-phenyl-4-(4,4,5,5-tetramethyl-1,3,2-dioxaborolan-2-yl)but-3-en-1-ol (**3a**)**<sup>1</sup> Prepared according to the general procedure. The crude mixture was purified by column chromatography

to give the title compound as colorless oil in 90% yield (24.8 mg). <sup>1</sup>H NMR (600 MHz, CDCl<sub>3</sub>) δ 7.30 – 7.37 (m, 4H), 7.24 – 7.26 (m, 1H), 6.67 (dd, *J* = 18.1, 6.5 Hz, 1H), 5.51 (d, *J* = 18.2 Hz, 1H), 4.77 (d, *J* = 2.6 Hz, 1H), 2.63 – 2.65 (m, 1H), 1.86 (br, 1H), 1.26 (s, 12H), 0.97 (d, *J* = 6.8 Hz, 3H). <sup>13</sup>C NMR (151 MHz, CDCl<sub>3</sub>) δ 155.9, 142.8, 128.4, 127.6, 126.5, 120.0, 83.5, 76.6, 46.6, 25.13, 25.05, 12.8. HRMS (ESI<sup>+</sup>): *m/z* for C<sub>17</sub>H<sub>25</sub>BO<sub>3</sub>Na [M+Na]<sup>+</sup> calcd. 311.1794, found 311.1806.

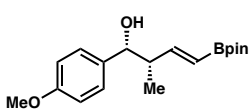

***rac*-(1*R*,2*S*,*E*)-1-(4-Methoxyphenyl)-2-methyl-4-(4,4,5,5-tetramethyl-1,3,2-dioxaborolan-2-yl)but-3-en-1-ol (**3b**)** Prepared according to the general procedure. The crude mixture was purified by column

chromatography to give the title compound as colorless oil in 94% yield (30 mg). <sup>1</sup>H NMR (600 MHz, CDCl<sub>3</sub>) δ 7.22 (d, *J* = 8.3 Hz, 2H), 6.86 (d, *J* = 8.5 Hz, 2H), 6.63 (dd, *J* = 18.2, 6.5 Hz, 1H), 5.48 (d, *J* = 18.1 Hz, 1H), 4.69 (d, *J* = 4.9 Hz, 1H), 3.80 (s, 3H), 2.58 – 2.63 (m, 1H), 1.83 (s, 1H), 1.25 (s, 12H), 0.98 (d, *J* = 6.8 Hz, 3H). <sup>13</sup>C NMR (151 MHz, CDCl<sub>3</sub>) δ 159.0, 155.9, 134.9, 127.7, 119.7, 113.7, 83.5, 76.5, 55.6, 46.7, 25.1, 25.0, 13.3. HRMS (EI<sup>+</sup>): *m/z* for C<sub>18</sub>H<sub>25</sub>BO<sub>3</sub> [M–H<sub>2</sub>O]<sup>+</sup> calcd. 300.1897, found 300.1913.

1. T. Miura, J. Nakahashi and M. Murakami, *Angew. Chem., Int. Ed.*, 2017, **56**, 6989.



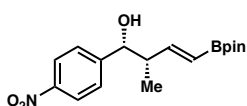

***rac*-(1*R*,2*S*,*E*)-2-Methyl-1-(4-nitrophenyl)-4-(4,4,5,5-tetramethyl-1,3,2-dioxaborolan-2-yl)but-3-en-1-ol (3c)** Prepared according to the general procedure. The crude mixture was purified by column chromatography to give the title compound as white solid in 78% yield (26 mg). <sup>1</sup>H NMR (600 MHz, CDCl<sub>3</sub>) δ 8.20 (d, *J* = 8.7 Hz, 2H), 7.49 (d, *J* = 8.5 Hz, 2H), 6.64 (dd, *J* = 18.1, 6.4 Hz, 1H), 5.53 (d, *J* = 18.2 Hz, 1H), 4.88 (d, *J* = 3.8 Hz, 1H), 2.64 – 2.67 (m, 1H), 2.05 (br, 1H), 1.27 (s, 12H), 0.94 (d, *J* = 6.8 Hz, 3H). <sup>13</sup>C NMR (151 MHz, CDCl<sub>3</sub>) δ 154.5, 150.2, 147.4, 127.4, 123.7, 83.7, 75.7, 46.5, 25.1, 25.0, 12.5. HRMS (ESI<sup>+</sup>): *m/z* for C<sub>17</sub>H<sub>24</sub>BNO<sub>5</sub>Cl[M+Cl]<sup>+</sup> calcd. 368.1436, found 368.1453

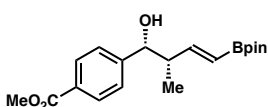

***rac*-Methyl-4-((1*R*,2*S*,*E*)-1-hydroxy-2-methyl-4-(4,4,5,5-tetramethyl-1,3,2-dioxaborolan-2-yl)but-3-en-1-yl)benzoate (3d)** Prepared according to the general procedure. The crude mixture was purified by column chromatography to give the title compound as white solid in 93% yield (32.3 mg). <sup>1</sup>H NMR (400 MHz, CDCl<sub>3</sub>) δ 8.00 (d, *J* = 8.2 Hz, 2H), 7.38 (d, *J* = 8.2 Hz, 2H), 6.64 (dd, *J* = 18.1, 6.5 Hz, 1H), 5.51 (d, *J* = 18.1 Hz, 1H), 4.82 (d, *J* = 4.4 Hz, 1H), 3.91 (s, 3H), 2.61 – 2.68 (m, 1H), 1.95 (br, 1H), 1.26 (s, 12H), 0.95 (d, *J* = 6.8 Hz, 3H). <sup>13</sup>C NMR (101 MHz, CDCl<sub>3</sub>) δ 167.3, 155.2, 148.0, 129.8, 129.4, 126.6, 120.2, 83.6, 76.3, 52.4, 46.6, 25.15, 25.08, 12.8. HRMS (ESI<sup>+</sup>): *m/z* for C<sub>19</sub>H<sub>27</sub>BO<sub>5</sub>Na[M+Na]<sup>+</sup> calcd. 369.1849, found 369.1814.

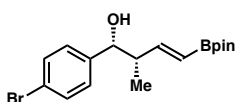

***rac*-(1*R*,2*S*,*E*)-1-(4-Bromophenyl)-2-methyl-4-(4,4,5,5-tetramethyl-1,3,2-dioxaborolan-2-yl)but-3-en-1-ol (3e)** Prepared according to the general procedure. The crude mixture was purified by column chromatography to give the title compound as white solid in 85% yield (31.2 mg). <sup>1</sup>H NMR (600 MHz, CDCl<sub>3</sub>) δ 7.45 (d, *J* = 8.3 Hz, 2H), 7.18 (d, *J* = 8.1 Hz, 2H), 6.62 (dd, *J* = 18.2, 6.5 Hz, 1H), 5.50 (dd, *J* = 18.1, 0.8 Hz, 1H), 4.72 (d, *J* = 4.5 Hz, 1H), 2.57 – 2.62 (m, 1H), 1.89 (s, 1H), 1.26 (s, 12H), 0.95 (d, *J* = 6.9 Hz, 3H). <sup>13</sup>C NMR (151 MHz, CDCl<sub>3</sub>) δ 155.3, 141.7, 131.5, 128.3, 121.3, 120.2, 83.6, 76.0, 46.5, 25.13, 25.05, 12.8. HRMS (ESI<sup>+</sup>): *m/z* for C<sub>17</sub>H<sub>28</sub>BNBrO<sub>3</sub>[M+NH<sub>4</sub>]<sup>+</sup> calcd. 384.1346, found 384.1319.

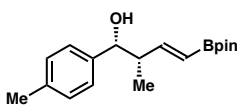

***rac*-(1*R*,2*S*,*E*)-2-Methyl-4-(4,4,5,5-tetramethyl-1,3,2-dioxaborolan-2-yl)-1-(*p*-tolyl)but-3-en-1-ol (3f)** Prepared according to the general procedure. The crude mixture was purified by column chromatography to give the title compound as colorless oil in 91% yield (27.4 mg). <sup>1</sup>H NMR (600 MHz, CDCl<sub>3</sub>) δ 7.19 (d, *J* = 7.8 Hz, 2H), 7.13 (d, *J* = 7.7 Hz, 2H), 6.66 (dd, *J*

= 18.1, 6.4 Hz, 1H), 5.50 (d,  $J$  = 18.0 Hz, 1H), 4.73 (d,  $J$  = 4.5 Hz, 1H), 2.59 – 2.64 (m, 1H), 2.33 (s, 3H), 1.71 (br, 1H), 1.26 (s, 12H), 0.97 (d,  $J$  = 6.8 Hz, 3H).  $^{13}\text{C}$  NMR (151 MHz,  $\text{CDCl}_3$ )  $\delta$  156.0, 139.8, 137.2, 129.1, 126.5, 119.6, 83.5, 76.6, 46.6, 25.13, 25.05, 21.5, 12.9. HRMS ( $\text{ESI}^+$ ):  $m/z$  for  $\text{C}_{18}\text{H}_{27}\text{BO}_3\text{Na}$   $[\text{M}+\text{Na}]^+$  calcd. 325.1951, found 325.1974.

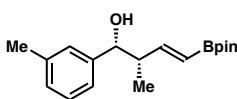

***rac*-(1*R*,2*S*,*E*)-2-Methyl-4-(4,4,5,5-tetramethyl-1,3,2-dioxaborolan-2-yl)-1-(*m*-tolyl)but-3-en-1-ol (3g)** Prepared according to the general procedure. The crude mixture was purified by column

chromatography to give the title compound as colorless oil in 93% yield (28.0 mg).  $^1\text{H}$  NMR (600 MHz,  $\text{CDCl}_3$ )  $\delta$  7.21 (dd,  $J$  = 7.5, 7.5 Hz, 1H), 7.12 (s, 1H), 7.09 (d,  $J$  = 7.6 Hz, 1H), 7.06 (d,  $J$  = 7.3 Hz, 1H), 6.67 (dd,  $J$  = 18.2, 6.4 Hz, 1H), 5.50 (dd,  $J$  = 18.2, 1.0 Hz, 1H), 4.73 (d,  $J$  = 4.2 Hz, 1H), 2.60 – 2.65 (m, 1H), 2.34 (s, 3H), 1.84 (s, 1H), 1.26 (s, 12H), 0.97 (d,  $J$  = 6.8 Hz, 3H).  $^{13}\text{C}$  NMR (151 MHz,  $\text{CDCl}_3$ )  $\delta$  156.0, 142.7, 138.0, 128.31, 128.29, 127.2, 123.6, 119.7, 83.5, 76.7, 46.5, 25.1, 25.0, 21.9, 12.8. HRMS ( $\text{ESI}^+$ ):  $m/z$  for  $\text{C}_{18}\text{H}_{27}\text{BO}_3\text{Na}$   $[\text{M}+\text{Na}]^+$  calcd. 325.1951, found 325.1963.

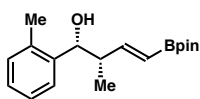

***rac*-(1*R*,2*S*,*E*)-2-Methyl-4-(4,4,5,5-tetramethyl-1,3,2-dioxaborolan-2-yl)-1-(*o*-tolyl)but-3-en-1-ol (3h)** Prepared according to the general procedure. The crude mixture was purified by column chromatography

to give the title compound as colorless oil in 94% yield (28.5 mg).  $^1\text{H}$  NMR (600 MHz,  $\text{CDCl}_3$ )  $\delta$  7.48 (d,  $J$  = 7.5 Hz, 1H), 7.22 (dd,  $J$  = 7.3, 7.3 Hz, 1H), 7.16 (dd,  $J$  = 7.0, 7.0 Hz, 1H), 7.12 (d,  $J$  = 7.2 Hz, 1H), 6.75 (dd,  $J$  = 18.2, 6.1 Hz, 1H), 5.55 (d,  $J$  = 18.2 Hz, 1H), 5.01 (d,  $J$  = 3.2 Hz, 1H), 2.56 – 2.60 (m, 1H), 2.29 (s, 3H), 1.74 (br, 1H), 1.27 (s, 12H), 1.01 (d,  $J$  = 6.8 Hz, 3H).  $^{13}\text{C}$  NMR (151 MHz,  $\text{CDCl}_3$ )  $\delta$  156.5, 141.2, 134.5, 130.6, 127.3, 126.4, 126.2, 119.2, 83.6, 72.8, 44.4, 25.12, 25.07, 19.5, 11.8. HRMS ( $\text{ESI}^+$ ):  $m/z$  for  $\text{C}_{18}\text{H}_{31}\text{BNO}_3$   $[\text{M}+\text{NH}_4]^+$  calcd. 320.2397, found 320.2366.

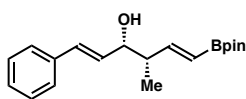

***rac*-(1*E*,3*S*,4*S*,5*E*)-4-Methyl-1-phenyl-6-(4,4,5,5-tetramethyl-1,3,2-dioxaborolan-2-yl)hexa-1,5-dien-3-ol (3i)** Prepared according to the general procedure. The crude mixture was purified by column

chromatography to give the title compound as colorless oil in 91% yield (28.6 mg).  $^1\text{H}$  NMR (600 MHz,  $\text{CDCl}_3$ )  $\delta$  7.38 (d,  $J$  = 7.4 Hz, 2H), 7.32 (dd,  $J$  = 7.6, 7.4 Hz, 2H), 7.23 – 7.26 (m, 1H), 6.66 (dd,  $J$  = 18.1, 7.0 Hz, 1H), 6.60 (d,  $J$  = 15.9 Hz, 1H), 6.23 (dd,  $J$  = 15.9, 6.5 Hz, 1H), 5.57 (d,  $J$  = 18.1 Hz, 1H), 4.30 (dd,  $J$  = 4.9, 4.9 Hz, 1H), 2.53 – 2.59 (m, 1H), 1.61 (br, 1H), 1.27 (s, 12H), 1.08 (d,  $J$  = 6.9 Hz, 3H).  $^{13}\text{C}$  NMR (151 MHz,

CDCl<sub>3</sub>)  $\delta$  155.2, 137.0, 131.6, 130.1, 128.9, 127.9, 126.8, 120.6, 83.6, 75.7, 45.8, 25.14, 25.10, 14.3. HRMS (EI<sup>+</sup>):  $m/z$  for C<sub>19</sub>H<sub>25</sub>BO<sub>2</sub> [M-H<sub>2</sub>O]<sup>+</sup> calcd. 296.1948, found 296.1974.

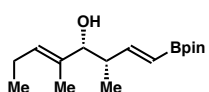

***rac*-(1*E*,3*S*,4*R*,5*E*)-3,5-Dimethyl-1-(4,4,5,5-tetramethyl-1,3,2-dioxaborolan-2-yl)octa-1,5-dien-4-ol (3j)** Prepared according to the general

procedure. The crude mixture was purified by column chromatography to give the title compound as colorless oil in 83% yield (23.2 mg). <sup>1</sup>H NMR (600 MHz, CDCl<sub>3</sub>)  $\delta$  6.49 (dd,  $J$  = 18.1, 7.3 Hz, 1H), 5.44 (d,  $J$  = 18.0 Hz, 1H), 5.38 (t,  $J$  = 6.9 Hz, 1H), 3.85 (d,  $J$  = 6.6 Hz, 1H), 2.42 – 2.47 (m, 1H), 1.96 – 2.05 (m, 2H), 1.56 (s, 3H), 1.48 (br, 1H), 1.252 (s, 6H), 1.245 (s, 6H), 1.03 (d,  $J$  = 6.7 Hz, 3H), 0.92 (t,  $J$  = 7.5 Hz, 3H). <sup>13</sup>C NMR (151 MHz, CDCl<sub>3</sub>)  $\delta$  156.6, 134.9, 129.4, 118.3, 83.4, 80.7, 43.3, 25.2, 25.0, 21.1, 14.7, 14.4, 12.3. HRMS (EI<sup>+</sup>):  $m/z$  for C<sub>16</sub>H<sub>27</sub>BO<sub>2</sub> [M-H<sub>2</sub>O]<sup>+</sup> calcd. 262.2104, found 262.2097.

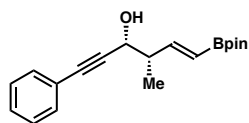

***rac*-(3*R*,4*S*,*E*)-4-Methyl-1-phenyl-6-(4,4,5,5-tetramethyl-1,3,2-dioxaborolan-2-yl)hex-5-en-1-yn-3-ol (3k)** Prepared according to the

general procedure. The crude mixture was purified by column chromatography to give the title compound as colorless oil in 58% yield (18.2 mg). <sup>1</sup>H NMR (600 MHz, CDCl<sub>3</sub>)  $\delta$  7.43 – 7.44 (m, 2H), 7.31 – 7.32 (m, 3H), 6.69 (dd,  $J$  = 18.0, 7.5 Hz, 1H), 5.63 (d,  $J$  = 18.0 Hz, 1H), 4.57 (d,  $J$  = 4.5 Hz, 1H), 2.62 – 2.67 (m, 1H), 1.90 (br, 1H), 1.27 (s, 12H), 1.21 (d,  $J$  = 6.8 Hz, 3H). <sup>13</sup>C NMR (151 MHz, CDCl<sub>3</sub>)  $\delta$  153.8, 132.1, 128.8, 128.6, 122.8, 121.5, 88.4, 86.4, 83.6, 66.5, 46.5, 25.2, 25.1, 15.3. HRMS (ESI<sup>+</sup>):  $m/z$  for C<sub>19</sub>H<sub>25</sub>BO<sub>3</sub>Na [M+Na]<sup>+</sup> calcd. 335.1794, found 335.1810.

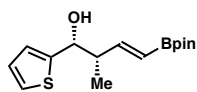

***rac*-(1*R*,2*S*,*E*)-2-Methyl-4-(4,4,5,5-tetramethyl-1,3,2-dioxaborolan-2-yl)-1-(thiophen-2-yl)but-3-en-1-ol (3l)** Prepared according to the

general procedure. The crude mixture was purified by column chromatography to give the title compound as colorless oil in 82% yield (24.1 mg). <sup>1</sup>H NMR (600 MHz, CDCl<sub>3</sub>)  $\delta$  7.23 (d,  $J$  = 4.0 Hz, 1H), 6.94 – 6.96 (m, 2H), 6.64 (dd,  $J$  = 18.1, 6.7 Hz, 1H), 5.53 (d,  $J$  = 18.1 Hz, 1H), 4.96 (d,  $J$  = 4.2 Hz, 1H), 2.69 – 2.72 (m, 1H), 2.05 (s, 1H), 1.26 (s, 12H), 1.07 (d,  $J$  = 6.8 Hz, 3H). <sup>13</sup>C NMR (151 MHz, CDCl<sub>3</sub>)  $\delta$  154.9, 146.7, 126.9, 124.8, 124.4, 120.3, 83.5, 73.6, 47.0, 25.1, 25.0, 13.9. HRMS (EI<sup>+</sup>):  $m/z$  for C<sub>15</sub>H<sub>21</sub>BO<sub>2</sub>S [M-H<sub>2</sub>O]<sup>+</sup> calcd. 276.1355, found 276.1377.

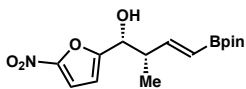

***rac*-(1*R*,2*S*,*E*)-2-Methyl-1-(5-nitrofuran-2-yl)-4-(4,4,5,5-tetramethyl-1,3,2-dioxaborolan-2-yl)but-3-en-1-ol (3m)** Prepared

according to the general procedure. The crude mixture was purified by column chromatography to give the title compound as colorless oil in 67% yield (21.7 mg). <sup>1</sup>H NMR (600 MHz, CDCl<sub>3</sub>) δ 7.29 (d, *J* = 3.4 Hz, 1H), 6.57 (dd, *J* = 18.1, 6.9 Hz, 1H), 6.52 (d, *J* = 3.0 Hz, 1H), 5.57 (d, *J* = 18.1 Hz, 1H), 4.79 (d, *J* = 3.2 Hz, 1H), 2.83 – 2.88 (m, 1H), 2.16 (s, 1H), 1.27 (s, 12H), 1.06 (d, *J* = 6.8 Hz, 3H). <sup>13</sup>C NMR (151 MHz, CDCl<sub>3</sub>) δ 159.4, 153.1, 151.9, 121.5, 113.0, 110.6, 83.8, 71.0, 44.4, 25.1, 25.0, 13.7. HRMS (ESI<sup>+</sup>): *m/z* for C<sub>15</sub>H<sub>22</sub>BNO<sub>6</sub>Na [M+Na]<sup>+</sup> calcd. 346.1438, found 346.1468.

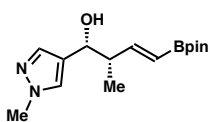

***rac*-(1*R*,2*S*,*E*)-2-Methyl-1-(1-methyl-1*H*-pyrazol-4-yl)-4-(4,4,5,5-tetramethyl-1,3,2-dioxaborolan-2-yl)but-3-en-1-ol (3n)** Prepared

according to the general procedure. The crude mixture was purified by column chromatography to give the title compound as colorless oil in 86% yield (25.2 mg). <sup>1</sup>H NMR (400 MHz, CDCl<sub>3</sub>) δ 7.40 (s, 1H), 7.30 (s, 1H), 6.63 (dd, *J* = 18.1, 6.7 Hz, 1H), 5.53 (d, *J* = 17.4 Hz, 1H), 4.70 (d, *J* = 5.1 Hz, 1H), 3.88 (s, 3H), 2.57 – 2.65 (m, 1H), 1.62 (br, 1H), 1.26 (s, 12H), 1.04 (d, *J* = 6.8 Hz, 3H). <sup>13</sup>C NMR (151 MHz, CDCl<sub>3</sub>) δ 155.2, 137.6, 128.7, 123.9, 120.3, 83.6, 70.2, 46.2, 39.3, 25.14, 25.08, 14.1. HRMS (ESI<sup>+</sup>): *m/z* for C<sub>15</sub>H<sub>26</sub>BN<sub>2</sub>O<sub>3</sub> [M+H]<sup>+</sup> calcd. 293.2036, found 293.2029.

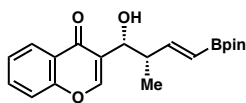

***rac*-3-((1*R*,2*S*,*E*)-1-Hydroxy-2-methyl-4-(4,4,5,5-tetramethyl-1,3,2-dioxaborolan-2-yl)but-3-en-1-yl)-4*H*-chromen-4-one (3o)**

Prepared according to the general procedure. The crude mixture was purified by column chromatography to give the title compound as colorless oil in 89% yield (31.7 mg). <sup>1</sup>H NMR (600 MHz, CDCl<sub>3</sub>) δ 8.20 (d, *J* = 8.0 Hz, 1H), 7.86 (s, 1H), 7.69 (ddd, *J* = 7.0, 7.0, 1.4 Hz, 1H), 7.47 (d, *J* = 8.3 Hz, 1H), 7.42 (dd, *J* = 7.2, 7.2 Hz, 1H), 6.61 (dd, *J* = 18.1, 6.9 Hz, 1H), 5.47 (d, *J* = 18.1 Hz, 1H), 4.56 (d, *J* = 6.2 Hz, 1H), 3.25 (br, 1H), 2.92 – 2.97 (m, 1H), 1.25 (s, 12H), 1.10 (d, *J* = 6.8 Hz, 3H). <sup>13</sup>C NMR (151 MHz, CDCl<sub>3</sub>) δ 178.3, 156.5, 155.8, 153.6, 134.2, 125.9, 125.6, 124.1, 124.0, 120.1, 118.5, 83.6, 72.5, 43.9, 25.1, 25.0, 14.1. HRMS (ESI<sup>+</sup>): *m/z* for C<sub>20</sub>H<sub>25</sub>BO<sub>5</sub>Na [M+Na]<sup>+</sup> calcd. 379.1693, found 379.1711.

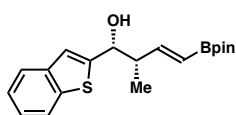

***rac*-(1*R*,2*S*,*E*)-1-(Benzo[*b*]thiophen-2-yl)-2-methyl-4-(4,4,5,5-tetramethyl-1,3,2-dioxaborolan-2-yl)but-3-en-1-ol (3p)** Prepared

according to the general procedure. The crude mixture was purified by column chromatography to give the title compound as colorless oil in 78% yield (26.7

mg).  $^1\text{H}$  NMR (600 MHz,  $\text{CDCl}_3$ )  $\delta$  7.81 (d,  $J = 7.7$  Hz, 1H), 7.71 (d,  $J = 7.6$  Hz, 1H), 7.33 (dd,  $J = 6.9, 6.9$  Hz, 1H), 7.29 (dd,  $J = 8.0, 8.0$  Hz, 1H), 7.19 (s, 1H), 6.68 (dd,  $J = 18.1, 6.6$  Hz, 1H), 5.57 (d,  $J = 18.1$  Hz, 1H), 5.03 (d,  $J = 4.7$  Hz, 1H), 2.76 – 2.79 (m, 1H), 1.89 (br, 1H), 1.26 (s, 12H), 1.11 (d,  $J = 6.8$  Hz, 3H).  $^{13}\text{C}$  NMR (151 MHz,  $\text{CDCl}_3$ )  $\delta$  154.8, 147.6, 139.8, 139.6, 124.5, 124.3, 123.7, 122.7, 120.9, 120.5, 83.6, 73.8, 46.7, 25.12, 25.05, 13.6. HRMS ( $\text{ESI}^+$ ):  $m/z$  for  $\text{C}_{19}\text{H}_{25}\text{BO}_3\text{SNa}$   $[\text{M}+\text{Na}]^+$  calcd. 367.1515, found 367.1530.

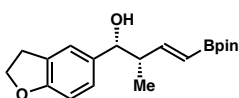

***rac*-(1*R*,2*S*,*E*)-1-(2,3-Dihydrobenzofuran-5-yl)-2-methyl-4-(4,4,5,5-tetramethyl-1,3,2-dioxaborolan-2-yl)but-3-en-1-ol (3q)**

Prepared according to the general procedure. The crude mixture was purified by column chromatography to give the title compound as colorless oil in 91% yield (30.0 mg).  $^1\text{H}$  NMR (400 MHz,  $\text{CDCl}_3$ )  $\delta$  7.16 (s, 1H), 7.00 – 7.03 (m, 1H), 6.72 (d,  $J = 8.2$  Hz, 1H), 6.62 (dd,  $J = 18.2, 6.6$  Hz, 1H), 5.47 (dd,  $J = 3.2, 1.9$  Hz, 1H), 4.65 (dd,  $J = 4.7, 2.9$  Hz, 1H), 4.56 (t,  $J = 8.7$  Hz, 2H), 3.19 (t,  $J = 8.7$  Hz, 2H), 2.56 – 2.64 (m, 1H), 1.77 (d,  $J = 3.3$  Hz, 1H), 1.26 (s, 12H), 1.01 (d,  $J = 6.8$  Hz, 3H).  $^{13}\text{C}$  NMR (151 MHz,  $\text{CDCl}_3$ )  $\delta$  159.6, 156.0, 135.0, 127.2, 126.5, 123.2, 119.5, 108.9, 83.5, 76.8, 71.6, 46.7, 30.0, 25.1, 25.0, 13.4. HRMS ( $\text{EI}^+$ ):  $m/z$  for  $\text{C}_{19}\text{H}_{25}\text{BO}_3$   $[\text{M}-\text{H}_2\text{O}]^+$  calcd. 312.1897, found 312.1915.

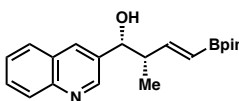

***rac*-(1*R*,2*S*,*E*)-2-Methyl-1-(quinolin-3-yl)-4-(4,4,5,5-tetramethyl-1,3,2-dioxaborolan-2-yl)but-3-en-1-ol (3r)** Prepared according to the general procedure. The crude mixture was purified by column

chromatography to give the title compound as colorless oil in 91% yield (30.7 mg).  $^1\text{H}$  NMR (600 MHz,  $\text{CDCl}_3$ )  $\delta$  8.83 (s, 1H), 8.14 (s, 1H), 8.11 (d,  $J = 8.3$  Hz, 1H), 7.82 (d,  $J = 7.9$  Hz, 1H), 7.71 (dd,  $J = 7.2, 7.2$  Hz, 1H), 7.56 (dd,  $J = 7.2, 7.2$  Hz, 1H), 6.69 (dd,  $J = 18.1, 6.4$  Hz, 1H), 5.54 (d,  $J = 18.1$  Hz, 1H), 5.00 (d,  $J = 3.6$  Hz, 1H), 2.75 – 2.79 (m, 1H), 2.44 (br, 1H), 1.25 (s, 12H), 1.01 (d,  $J = 6.7$  Hz, 3H).  $^{13}\text{C}$  NMR (151 MHz,  $\text{CDCl}_3$ )  $\delta$  154.7, 149.4, 147.2, 135.6, 134.1, 129.9, 129.0, 128.2, 128.0, 127.3, 120.8, 83.6, 74.6, 46.5, 25.1, 25.0, 12.9. HRMS ( $\text{ESI}^+$ ):  $m/z$  for  $\text{C}_{20}\text{H}_{27}\text{BNO}_3$   $[\text{M}+\text{H}]^+$  calcd. 340.2084, found 340.2103.

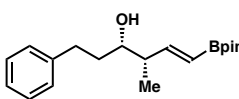

***rac*-(3*S*,4*S*,*E*)-4-Methyl-1-phenyl-6-(4,4,5,5-tetramethyl-1,3,2-dioxaborolan-2-yl)hex-5-en-3-ol (3s)** Prepared according to the general procedure. The crude mixture was purified by column

chromatography to give the title compound as colorless oil in 72% yield (22.6 mg).  $^1\text{H}$

NMR (600 MHz, CDCl<sub>3</sub>)  $\delta$  7.26 – 7.30 (m, 2H), 7.18– 7.21 (m, 3H), 6.57 (dd,  $J$  = 18.1, 7.0 Hz, 1H), 5.50 (dd,  $J$  = 18.1, 0.9 Hz, 1H), 3.58 – 3.60 (m, 1H), 2.82 – 2.87 (m, 1H), 2.62 – 2.66 (m, 1H), 2.35 – 2.38 (m, 1H), 1.77 – 1.82 (m, 1H), 1.69 – 1.75 (m, 1H), 1.40 (br, 1H), 1.27 (s, 12H), 1.04 (d,  $J$  = 6.8 Hz, 3H). <sup>13</sup>C NMR (151 MHz, CDCl<sub>3</sub>)  $\delta$  156.1, 142.4, 128.8, 128.7, 126.1, 83.5, 73.9, 45.6, 36.3, 32.8, 25.14, 25.11, 13.8. HRMS (ESI<sup>+</sup>):  $m/z$  for C<sub>19</sub>H<sub>29</sub>BO<sub>3</sub>Na [M+Na]<sup>+</sup> calcd. 339.2107, found 339.2135.

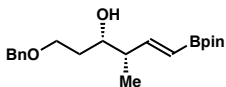

***rac*-(3*S*,4*S*,*E*)-1-(Benzyloxy)-4-methyl-6-(4,4,5,5-tetramethyl-1,3,2-dioxaborolan-2-yl)hex-5-en-3-ol (3t)** Prepared according to the

general procedure. The crude mixture was purified by column chromatography to give the title compound as colorless oil in 51% yield (17.8 mg). <sup>1</sup>H NMR (600 MHz, CDCl<sub>3</sub>)  $\delta$  7.28 – 7.36 (m, 5H), 6.56 (dd,  $J$  = 18.1, 7.5 Hz, 1H), 5.47 (d,  $J$  = 18.1 Hz, 1H), 4.51 (s, 2H), 3.71 – 3.74 (m, 2H), 3.62 – 3.65 (m, 1H), 3.01 (s, 1H), 2.30 – 2.35 (m, 1H), 1.69 – 1.79 (m, 2H), 1.26 (s, 12H), 1.07 (d,  $J$  = 6.7 Hz, 3H). <sup>13</sup>C NMR (151 MHz, CDCl<sub>3</sub>)  $\delta$  156.3, 138.1, 128.8, 128.11, 128.05, 120.0, 83.5, 74.8, 73.7, 70.0, 46.2, 34.0, 25.13, 25.11, 15.2. HRMS (ESI<sup>+</sup>):  $m/z$  for C<sub>20</sub>H<sub>31</sub>BO<sub>4</sub>Na [M+Na]<sup>+</sup> calcd. 369.2213, found 369.2238.

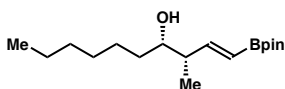

***rac*-(3*S*,4*S*,*E*)-3-Methyl-1-(4,4,5,5-tetramethyl-1,3,2-dioxaborolan-2-yl)dec-1-en-4-ol (3u)** Prepared according to the general

procedure. The crude mixture was purified by column chromatography to give the title compound as colorless oil in 72% yield (21.4 mg). <sup>1</sup>H NMR (600 MHz, CDCl<sub>3</sub>)  $\delta$  6.59 (dd,  $J$  = 18.1, 7.0 Hz, 1H), 5.50 (d,  $J$  = 18.1 Hz, 1H), 3.55 (br, 1H), 2.32 – 2.36 (m, 1H), 1.46 – 1.49 (m, 1H), 1.46 (br, 1H), 1.36 – 1.40 (m, 1H), 1.27 (s, 12H), 1.16 – 1.35 (m, 8H), 1.03 (d,  $J$  = 6.8 Hz, 3H), 0.86 – 0.88 (m, 3H). <sup>13</sup>C NMR (151 MHz, CDCl<sub>3</sub>)  $\delta$  156.6, 119.5, 83.5, 74.7, 45.4, 34.5, 32.2, 29.6, 26.4, 25.14, 25.11, 23.0, 14.5, 13.7. HRMS (ESI<sup>+</sup>):  $m/z$  for C<sub>17</sub>H<sub>37</sub>BNO<sub>3</sub> [M+NH<sub>4</sub>]<sup>+</sup> calcd. 314.2866, found 314.2881.

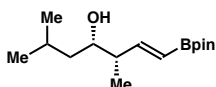

***rac*-(3*S*,4*S*,*E*)-3,6-Dimethyl-1-(4,4,5,5-tetramethyl-1,3,2-dioxaborolan-2-yl)hept-1-en-4-ol (3v)** Prepared according to the general

procedure. The crude mixture was purified by column chromatography to give the title compound as colorless oil in 89% yield (23.8 mg). <sup>1</sup>H NMR (600 MHz, CDCl<sub>3</sub>)  $\delta$  6.60 (dd,  $J$  = 18.1, 6.9 Hz, 1H), 5.50 (d,  $J$  = 18.1 Hz, 1H), 3.66 – 3.68 (m, 1H), 2.29 – 2.35 (m, 1H), 1.73 – 1.80 (m, 1H), 1.37 (ddd,  $J$  = 14.3, 10.0, 4.9 Hz, 1H), 1.27 (s, 12H), 1.19 – 1.31 (m, 2H), 1.02 (d,  $J$  = 6.8 Hz, 3H), 0.92 (d,  $J$  = 6.6 Hz, 3H), 0.89 (d,  $J$  = 6.5 Hz, 3H). <sup>13</sup>C NMR (151 MHz, CDCl<sub>3</sub>)  $\delta$  156.5, 83.5, 72.4, 45.7, 43.4, 25.2, 25.1, 25.0, 24.0, 22.0, 13.6. HRMS (ESI<sup>+</sup>):  $m/z$  for C<sub>15</sub>H<sub>29</sub>BO<sub>3</sub>Na [M+Na]<sup>+</sup> calcd. 291.2107, found 291.2102.

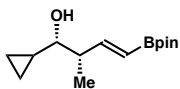

***rac*-(1*S*,2*S*,*E*)-1-Cyclopropyl-2-methyl-4-(4,4,5,5-tetramethyl-1,3,2-dioxaborolan-2-yl)but-3-en-1-ol (3w)**

Prepared according to the general procedure. The crude mixture was purified by column chromatography to give the title compound as colorless oil in 92% yield (23.1 mg).  $^1\text{H}$  NMR (600 MHz,  $\text{CDCl}_3$ )  $\delta$  6.71 (dd,  $J = 18.1, 6.8$  Hz, 1H), 5.53 (d,  $J = 18.1$  Hz, 1H), 2.82 (dd,  $J = 8.6, 4.6$  Hz, 1H), 2.50 – 2.54 (m, 1H), 1.53 (br, 1H), 1.26 (s, 12H), 1.12 (d,  $J = 6.9$  Hz, 3H), 0.91 – 0.97 (m, 1H), 0.47 – 0.56 (m, 2H), 0.21 – 0.29 (m, 2H).  $^{13}\text{C}$  NMR (151 MHz,  $\text{CDCl}_3$ )  $\delta$  156.3, 119.4, 83.5, 79.9, 45.7, 25.14, 25.06, 15.5, 14.3, 3.8, 2.8. HRMS ( $\text{ESI}^+$ ):  $m/z$  for  $\text{C}_{14}\text{H}_{29}\text{BNO}_3$   $[\text{M}+\text{NH}_4]^+$  calcd. 270.2240, found 270.2245.

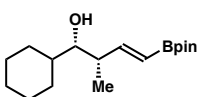

***rac*-(1*S*,2*S*,*E*)-1-Cyclohexyl-2-methyl-4-(4,4,5,5-tetramethyl-1,3,2-dioxaborolan-2-yl)but-3-en-1-ol (3x)**

Prepared according to the general procedure. The crude mixture was purified by column chromatography to give the title compound as colorless oil in 74% yield (21.7 mg).  $^1\text{H}$  NMR (600 MHz,  $\text{CDCl}_3$ )  $\delta$  6.61 (dd,  $J = 18.2, 6.5$  Hz, 1H), 5.50 (dd,  $J = 18.2, 1.0$  Hz, 1H), 3.27 (dd,  $J = 6.2, 5.0$  Hz, 1H), 2.47 – 2.50 (m, 1H), 1.93 (d,  $J = 12.4$  Hz, 1H), 1.73 (d,  $J = 10.3$  Hz, 2H), 1.57 – 1.65 (m, 3H), 1.37 – 1.40 (m, 1H), 1.27 (s, 12H), 1.09 – 1.27 (m, 3H), 1.01 (d,  $J = 6.8$  Hz, 3H), 0.93 – 1.06 (m, 2H).  $^{13}\text{C}$  NMR (151 MHz,  $\text{CDCl}_3$ )  $\delta$  157.5, 119.0, 83.5, 78.5, 41.6, 40.5, 29.8, 28.4, 26.7, 26.5, 26.2, 25.1 (two overlapping carbon signals), 12.6. HRMS ( $\text{ESI}^+$ ):  $m/z$  for  $\text{C}_{17}\text{H}_{31}\text{BO}_3\text{Na}$   $[\text{M}+\text{Na}]^+$  calcd. 317.2264, found 317.2277.

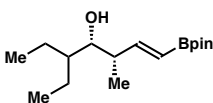

***rac*-(3*S*,4*S*,*E*)-5-Ethyl-3-methyl-1-(4,4,5,5-tetramethyl-1,3,2-dioxaborolan-2-yl)hept-1-en-4-ol (3y)**

Prepared according to the general procedure. The crude mixture was purified by column chromatography to give the title compound as colorless oil in 68% yield (19.2 mg).  $^1\text{H}$  NMR (600 MHz,  $\text{CDCl}_3$ )  $\delta$  6.58 (dd,  $J = 18.1, 6.9$  Hz, 1H), 5.49 (d,  $J = 18.1$  Hz, 1H), 3.48 (dd,  $J = 5.2, 5.2$  Hz, 1H), 2.47 – 2.50 (m, 1H), 1.57 – 1.60 (m, 2H), 1.31 – 1.39 (m, 3H), 1.27 (s, 12H), 1.26 (br, 1H), 1.04 (d,  $J = 6.7$  Hz, 3H), 0.85 – 0.87 (m, 6H).  $^{13}\text{C}$  NMR (151 MHz,  $\text{CDCl}_3$ )  $\delta$  157.5, 83.5, 75.4, 42.8, 42.4, 25.14, 25.08, 21.8, 20.5, 13.5, 11.4, 11.0. HRMS ( $\text{ESI}^+$ ):  $m/z$  for  $\text{C}_{16}\text{H}_{31}\text{BO}_3\text{Na}$   $[\text{M}+\text{Na}]^+$  calcd. 305.2264, found 305.2291.

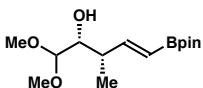

***rac*-(2*R*,3*S*,*E*)-1,1-Dimethoxy-3-methyl-5-(4,4,5,5-tetramethyl-1,3,2-dioxaborolan-2-yl)pent-4-en-2-ol (3z)**

Prepared according to the general procedure. The crude mixture was purified by column chromatography to give the title compound as colorless oil in 81% yield (23.2 mg).  $^1\text{H}$  NMR (600 MHz,  $\text{CDCl}_3$ )  $\delta$  6.63 (dd,  $J = 18.1, 7.0$  Hz, 1H), 5.51 (dd,  $J = 18.1, 0.8$  Hz, 1H), 4.25 (d,  $J = 5.6$  Hz, 1H),

3.60 (*app.* t,  $J = 5.3$  Hz, 1H), 3.44 (s, 3H), 3.39 (s, 3H), 2.47 – 2.53 (m, 1H), 1.66 (br, 1H), 1.27 (s, 12H), 1.08 (d,  $J = 6.8$  Hz, 3H).  $^{13}\text{C}$  NMR (151 MHz,  $\text{CDCl}_3$ )  $\delta$  156.3, 118.8, 104.8, 83.5, 73.6, 55.4, 54.9, 41.4, 25.2, 25.1, 13.9. HRMS ( $\text{EI}^+$ ):  $m/z$  for  $\text{C}_{13}\text{H}_{23}\text{BO}_4$   $[\text{M}-\text{CH}_3\text{OH}]^+$  calcd. 254.1689, found 254.1669.

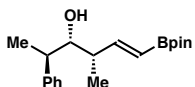

***rac*-(3*R*,4*S*,*E*)-4-Methyl-2-phenyl-6-(4,4,5,5-tetramethyl-1,3,2-dioxaborolan-2-yl)hex-5-en-3-ol (9)** Prepared according to the general

procedure. The crude mixture was purified by column chromatography to give the title compound as colorless oil in 78% yield (24.8 mg).  $^1\text{H}$  NMR (600 MHz,  $\text{CDCl}_3$ )  $\delta$  7.29 – 7.31 (m, 2H), 7.19 – 7.22 (m, 3H), 6.60 (dd,  $J = 18.1, 6.7$  Hz, 1H), 5.48 (d,  $J = 18.1$  Hz, 1H), 3.67 – 3.69 (m, 1H), 2.85 – 2.89 (m, 1H), 2.21 – 2.26 (m, 1H), 1.47 (s, 1H), 1.31 (d,  $J = 6.9$  Hz, 3H), 1.27 (s, 12H), 1.02 (d,  $J = 6.7$  Hz, 3H).  $^{13}\text{C}$  NMR (151 MHz,  $\text{CDCl}_3$ )  $\delta$  157.1, 145.0, 128.9, 127.9, 126.7, 83.5, 78.7, 43.1, 42.0, 25.2, 25.1, 16.7, 13.0. HRMS ( $\text{ESI}^+$ ):  $m/z$  for  $\text{C}_{19}\text{H}_{33}\text{BNO}_3$   $[\text{M}+\text{NH}_4]^+$  calcd. 334.2553, found 334.2566.

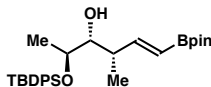

**(2*S*,3*R*,4*S*,*E*)-2-((*tert*-Butyldiphenylsilyl)oxy)-4-methyl-6-(4,4,5,5-tetramethyl-1,3,2-dioxaborolan-2-yl)hex-5-en-3-ol (10)** Prepared

according to the general procedure. The crude mixture was purified by column chromatography to give the title compound as colorless oil in 93% yield (45.8 mg).  $[\alpha]_{\text{D}}^{25} = -4.1^\circ$  (c 1.94,  $\text{CHCl}_3$ );  $^1\text{H}$  NMR (600 MHz,  $\text{CDCl}_3$ )  $\delta$  7.62 – 7.68 (m, 4H), 7.36 – 7.44 (m, 6H), 6.20 (dd,  $J = 18.0, 8.2$  Hz, 1H), 5.32 (d,  $J = 18.0$  Hz, 1H), 3.78 – 3.81 (m, 1H), 3.38 – 3.39 (m, 1H), 2.36 (s, 1H), 2.23 – 2.29 (m, 1H), 1.24 (s, 6H), 1.23 (s, 6H), 1.05 (s, 9H), 1.02 (d,  $J = 6.9$  Hz, 3H), 1.00 (d,  $J = 6.4$  Hz, 3H).  $^{13}\text{C}$  NMR (151 MHz,  $\text{CDCl}_3$ )  $\delta$  155.2, 136.10, 136.05, 134.2, 133.7, 130.1, 130.0, 128.0, 127.9, 119.2, 83.4, 78.0, 71.0, 42.4, 27.3, 25.2, 25.0, 19.5, 16.6, 16.3. HRMS ( $\text{ESI}^+$ ):  $m/z$  for  $\text{C}_{29}\text{H}_{43}\text{BO}_4\text{SiNa}$   $[\text{M}+\text{Na}]^+$  calcd. 517.2921, found 517.2892.

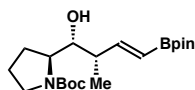

***tert*-Butyl-(*S*)-2-((1*R*,2*S*,*E*)-1-hydroxy-2-methyl-4-(4,4,5,5-tetramethyl-1,3,2-dioxaborolan-2-yl)but-3-en-1-yl)pyrrolidine-1-carboxylate (11)** Prepared according to the general procedure. The crude mixture

was purified by column chromatography to give the title compound as white solid in 74% yield (28.3 mg).  $[\alpha]_{\text{D}}^{25} = -18.1^\circ$  (c 1.07,  $\text{CHCl}_3$ );  $^1\text{H}$  NMR (600 MHz,  $\text{CDCl}_3$ )  $\delta$  6.50 (dd,  $J = 17.7, 8.2$  Hz, 1H), 5.44 (d,  $J = 17.9$  Hz, 1H), 3.85 (br, 2H), 3.54 (br, 1H), 3.19 – 3.23 (m, 1H), 2.25 – 2.28 (m, 1H), 1.92 (br, 1H), 1.85 (br, 2H), 1.67 – 1.72 (m, 1H), 1.45 (s, 9H), 1.26 (s, 6H), 1.25 (s, 6H), 1.11 (d,  $J = 6.5$  Hz, 3H).  $^{13}\text{C}$  NMR (151 MHz,  $\text{CDCl}_3$ )  $\delta$



156.1, 155.6, 119.2, 83.5, 80.0, 75.0, 61.1, 48.0, 43.9, 28.9, 25.6, 25.3, 25.0, 24.7, 17.1. HRMS (ESI<sup>+</sup>):  $m/z$  for C<sub>20</sub>H<sub>36</sub>BNO<sub>5</sub>Na [M+Na]<sup>+</sup> calcd. 404.2584, found 404.2563.

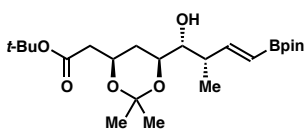

***tert*-Butyl-2-((4*R*,6*S*)-6-((1*R*,2*S*,*E*)-1-hydroxy-2-methyl-4-(4,4,5,5-tetramethyl-1,3,2-dioxaborolan-2-yl)but-3-en-1-yl)-2,2-dimethyl-1,3-dioxan-4-yl)acetate (**12**)** Prepared according to

the general procedure. The crude mixture was purified by column chromatography to give the title compound as white solid in 82% yield (36.2 mg).  $[\alpha]_D^{25} = -19.7^\circ$  (c 1.46, CHCl<sub>3</sub>); <sup>1</sup>H NMR (600 MHz, CDCl<sub>3</sub>)  $\delta$  6.48 (dd,  $J = 18.0, 8.0$  Hz, 1H), 5.46 (d,  $J = 18.0$  Hz, 1H), 4.22 – 4.25 (m, 1H), 3.83 – 3.85 (m, 1H), 3.48 (dd,  $J = 7.4, 4.1$  Hz, 1H), 2.36 – 2.42 (m, 2H), 2.32 (dd,  $J = 15.0, 5.0$  Hz, 1H), 2.13 (s, 1H), 1.51 (*app.* d,  $J = 12.8$  Hz, 1H), 1.44 (s, 9H), 1.42 (s, 3H), 1.38 – 1.41 (m, 1H), 1.35 (s, 3H), 1.28 (s, 12H), 1.09 (d,  $J = 6.6$  Hz, 3H). <sup>13</sup>C NMR (151 MHz, CDCl<sub>3</sub>)  $\delta$  170.6, 155.3, 119.6, 99.0, 83.6, 81.0, 75.6, 70.0, 66.1, 43.1, 41.4, 30.2, 29.4, 28.4, 25.1 (two overlapping carbon signals), 20.2, 16.0. HRMS (ESI<sup>+</sup>):  $m/z$  for C<sub>23</sub>H<sub>41</sub>BO<sub>7</sub>Na [M+Na]<sup>+</sup> calcd. 463.2843, found 463.2822.

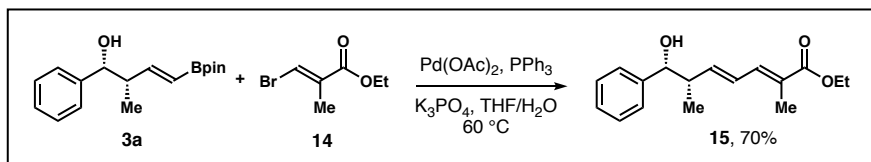

**Ethyl (2*E*,4*E*,6*S*,7*R*)-7-hydroxy-2,6-dimethyl-7-phenylhepta -2,4-dienoate (**15**)** An oven-dried 1-dram vial equipped with a magnetic stir bar was charged with Pd(OAc)<sub>2</sub> (0.01 mmol, 10 mol %), PPh<sub>3</sub> (0.02 mmol, 20 mol %) and K<sub>3</sub>PO<sub>4</sub> (0.2 mmol, 2.0 equiv). A solution of **3a** (29 mg, 0.1 mmol) in THF (0.5 mL) was added followed by the addition of ester **14** (39 mg, 0.2 mmol, 2.0 equiv) and H<sub>2</sub>O (0.05 mL). The reaction mixture was stirred at 60 °C for 12 h. After complete consumption of alcohol **3a**, Et<sub>2</sub>O (2 mL) was added and the resulting mixture was filtered through a pad of silica gel. The solvent was removed under reduced pressure and the residue was purified by flash column chromatography (n-hexane/ethyl acetate) to give product **15** (19.3 mg, 70% yield) as a yellow oil. <sup>1</sup>H NMR (600 MHz, CDCl<sub>3</sub>)  $\delta$  7.33 – 7.36 (m, 2H), 7.26 – 7.30 (m, 3H), 7.11 (d,  $J = 11.2$  Hz, 1H), 6.31 (dd,  $J = 14.5, 11.9$  Hz, 1H), 5.97 (dd,  $J = 15.1, 7.6$  Hz, 1H), 4.65 (d,  $J = 4.0$  Hz, 1H), 4.19 (q,  $J = 7.0$  Hz, 2H), 2.70 – 2.75 (m, 1H), 1.94 (s, 1H), 1.89 (s, 3H), 1.29 (t,  $J = 7.1$  Hz, 3H), 1.08 (d,  $J = 6.8$  Hz, 3H). <sup>13</sup>C NMR (151 MHz, CDCl<sub>3</sub>)  $\delta$  168.9, 143.9, 142.5, 138.4, 128.5, 128.0, 126.82, 126.79, 126.4, 77.9, 60.9, 44.7, 15.1, 14.7, 13.0. HRMS (ESI<sup>+</sup>):  $m/z$  for C<sub>17</sub>H<sub>23</sub>O<sub>3</sub> [M+H]<sup>+</sup> calcd. 275.1647, found 275.1628.

**Assignment of the absolute configuration of 10 and 12 using Mosher ester analysis:**

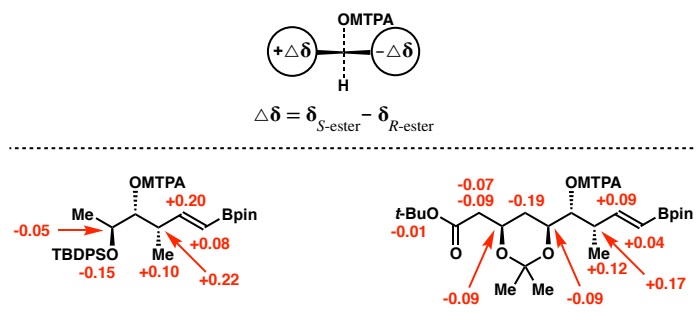

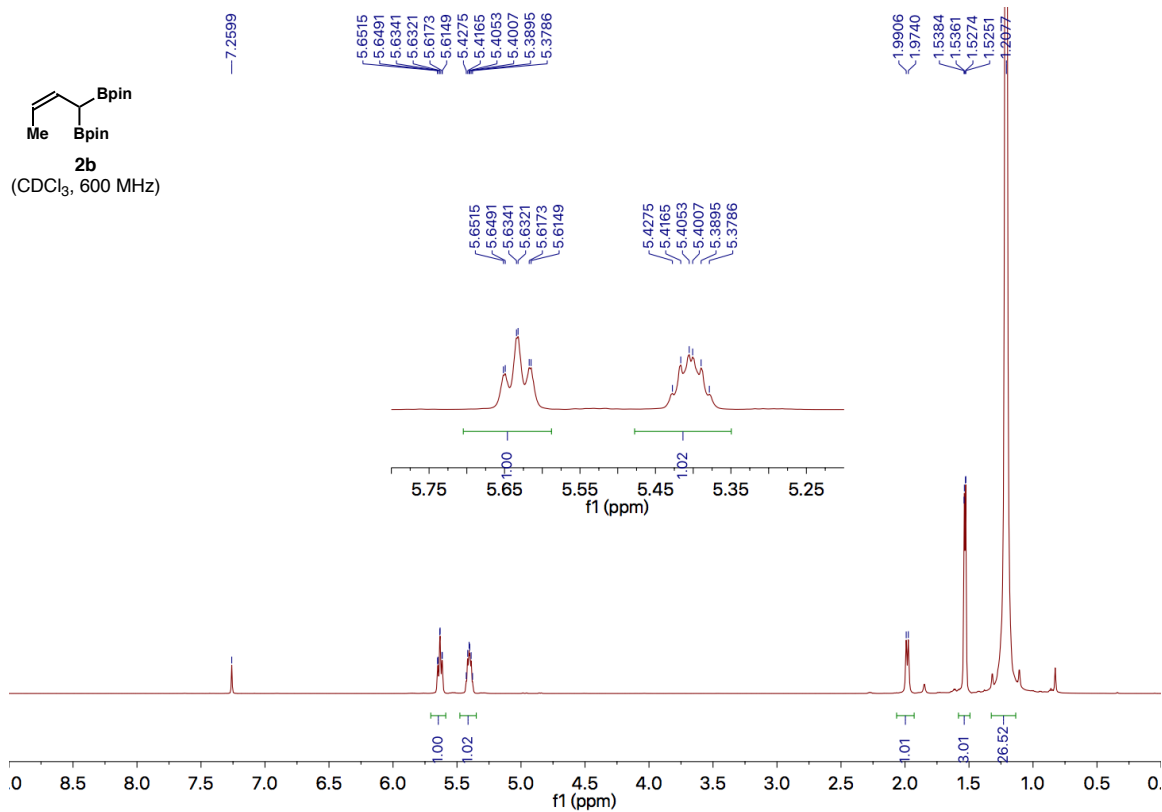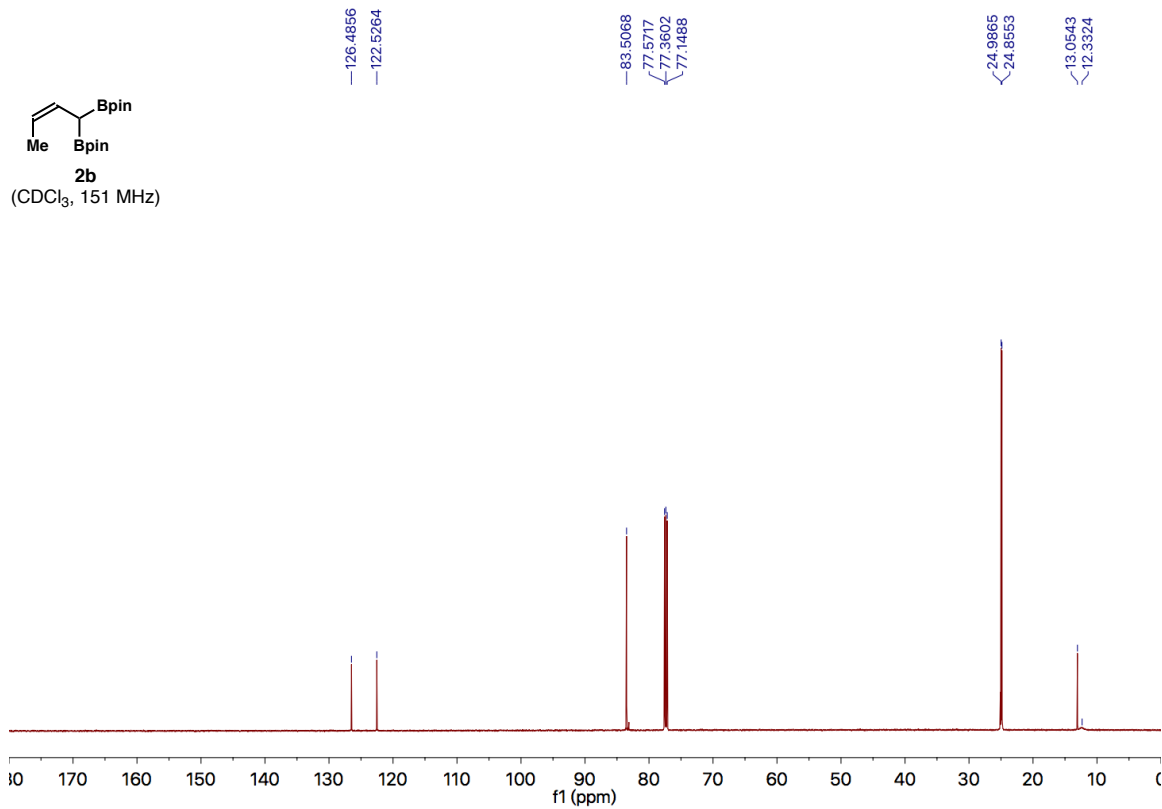

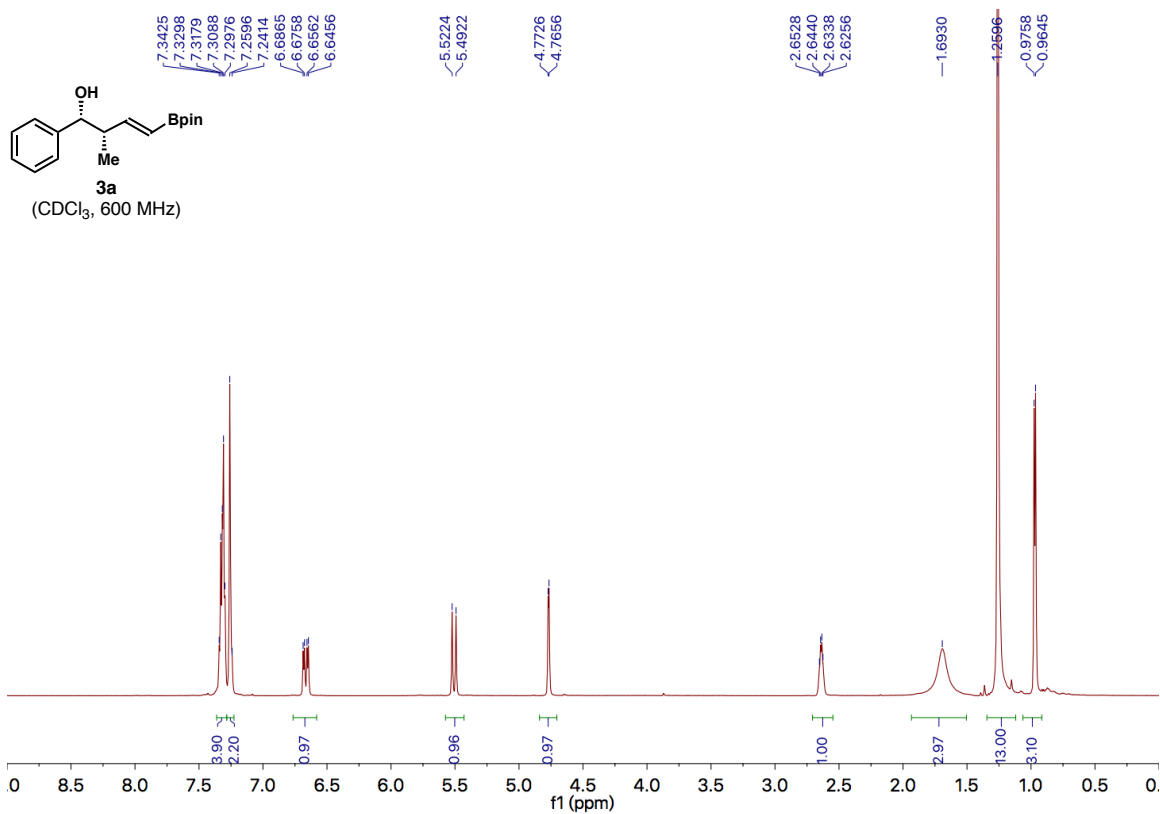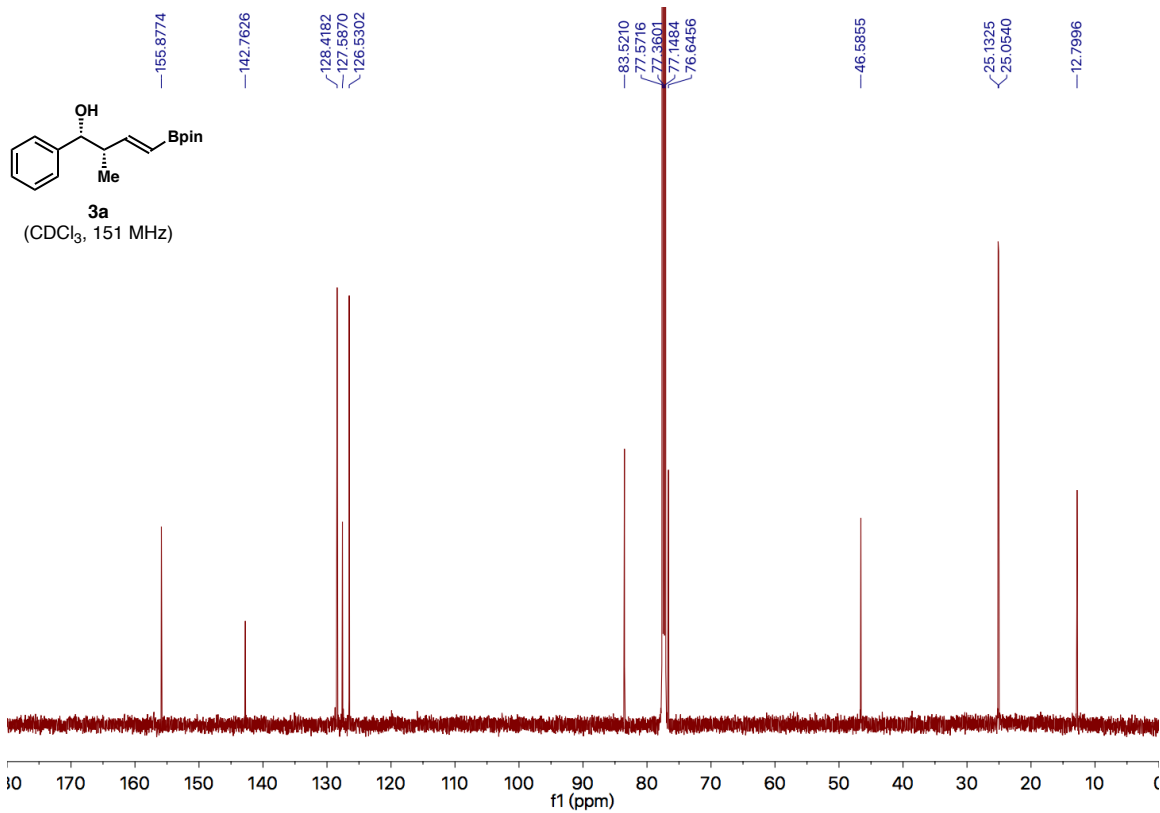

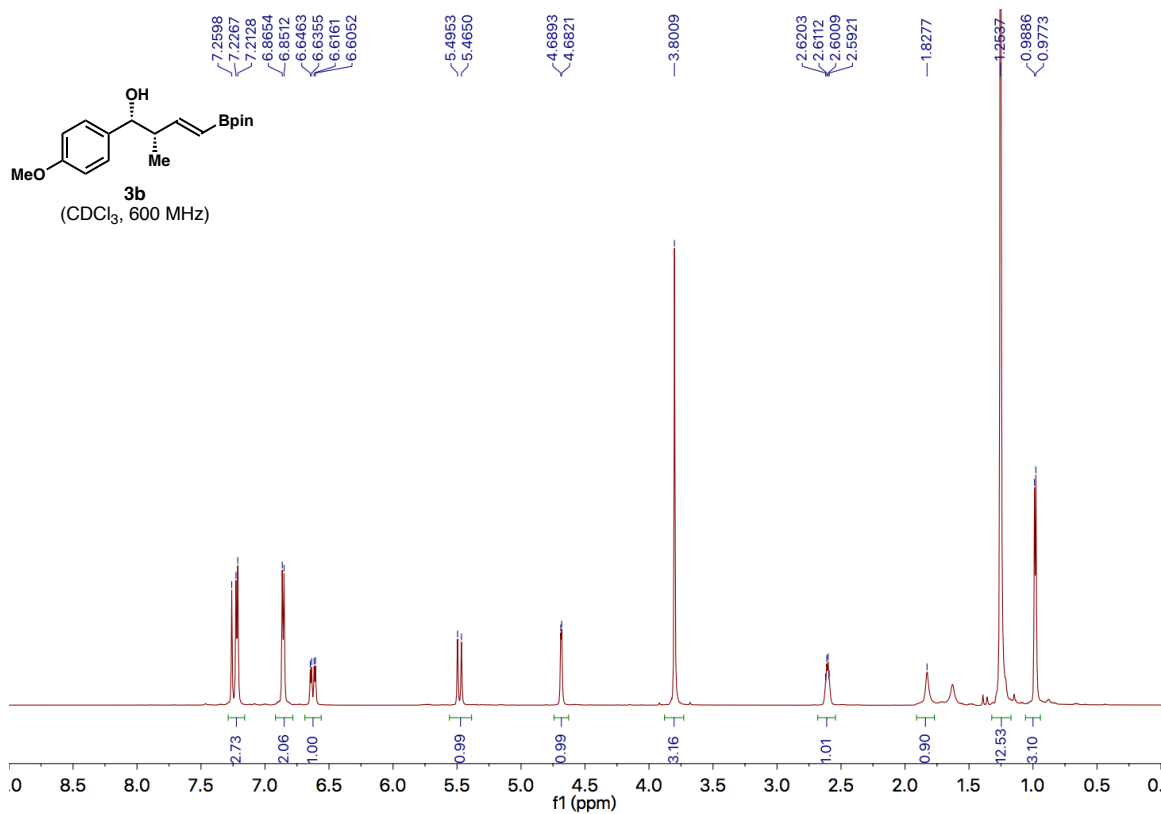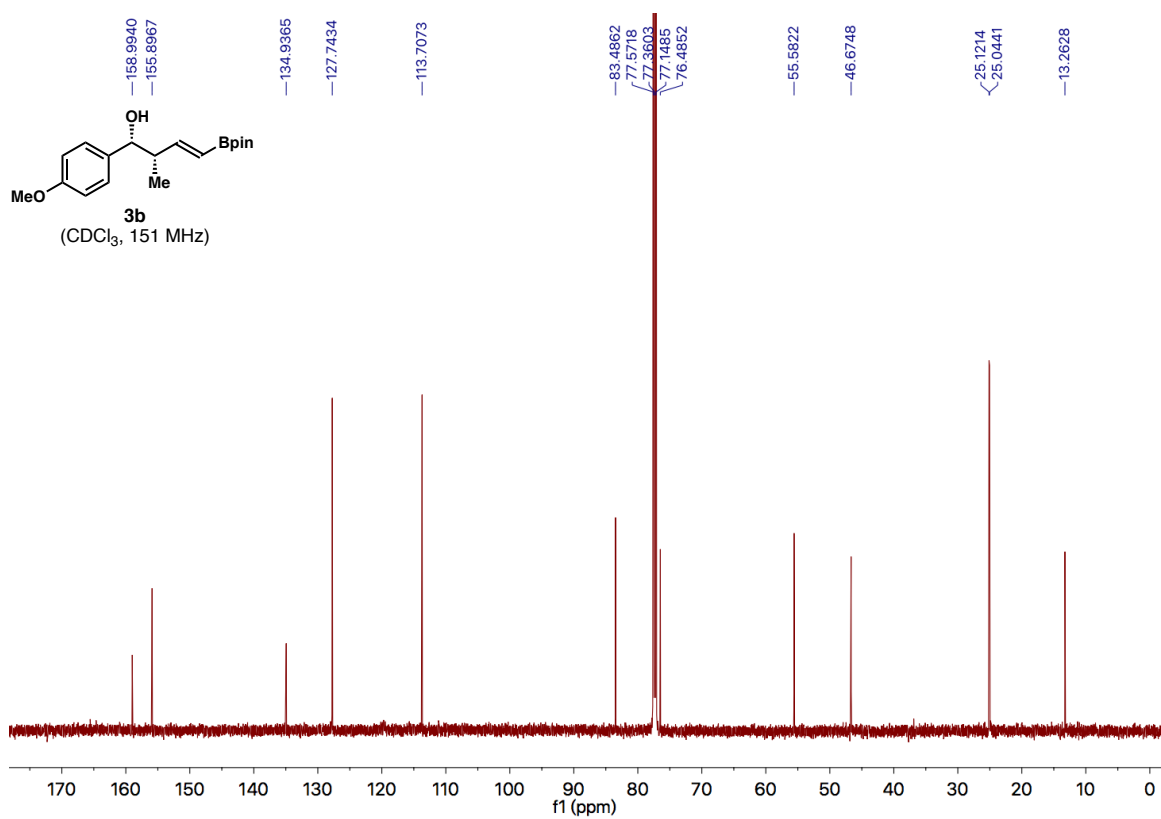

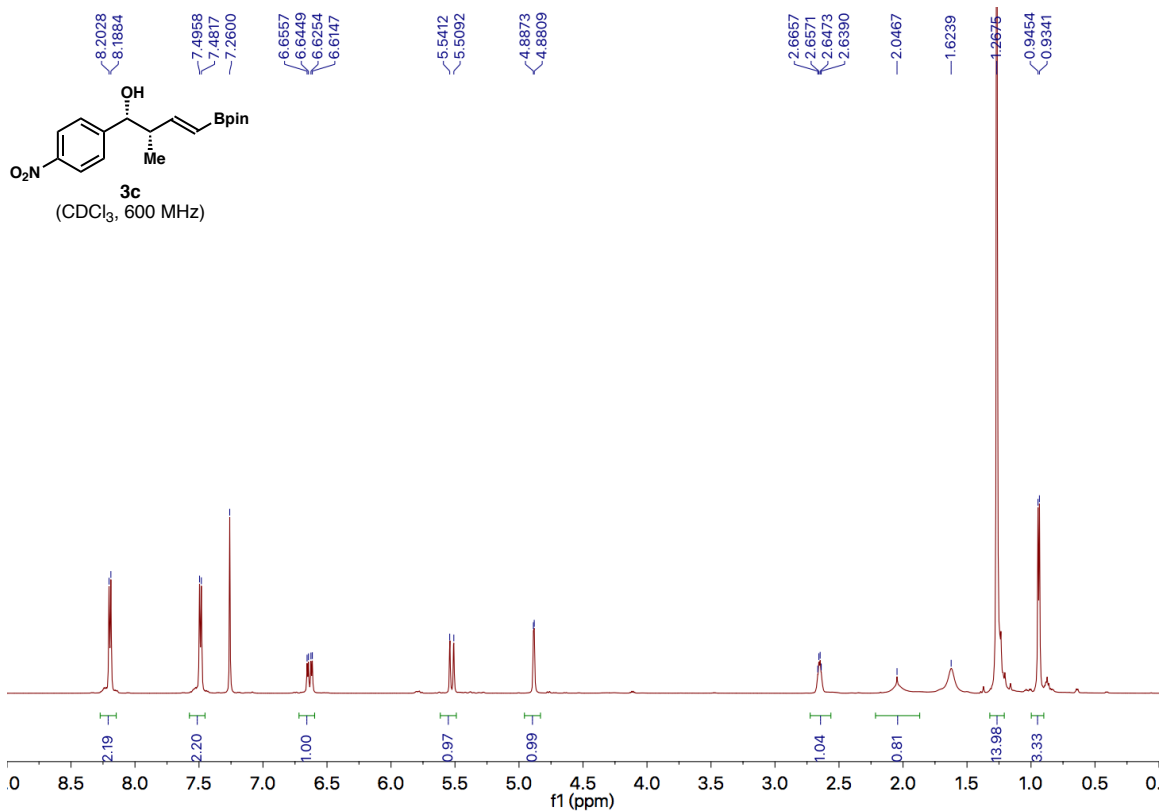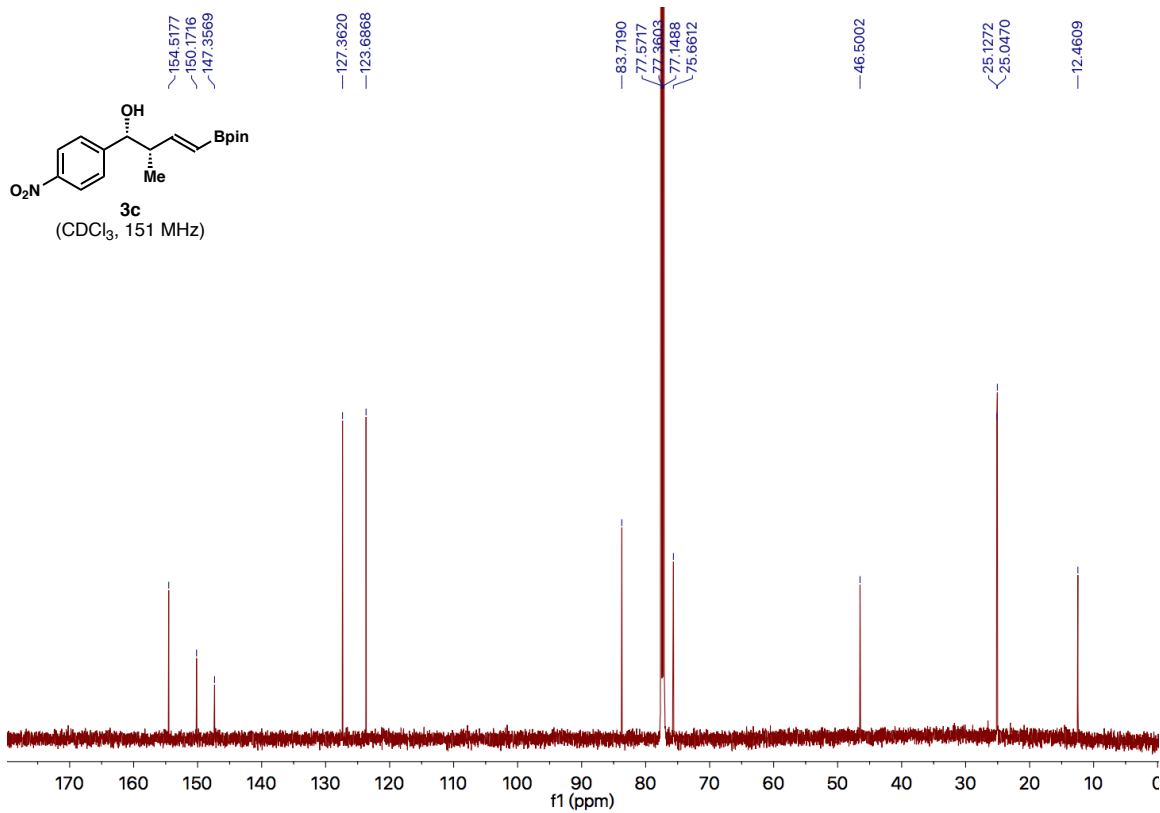

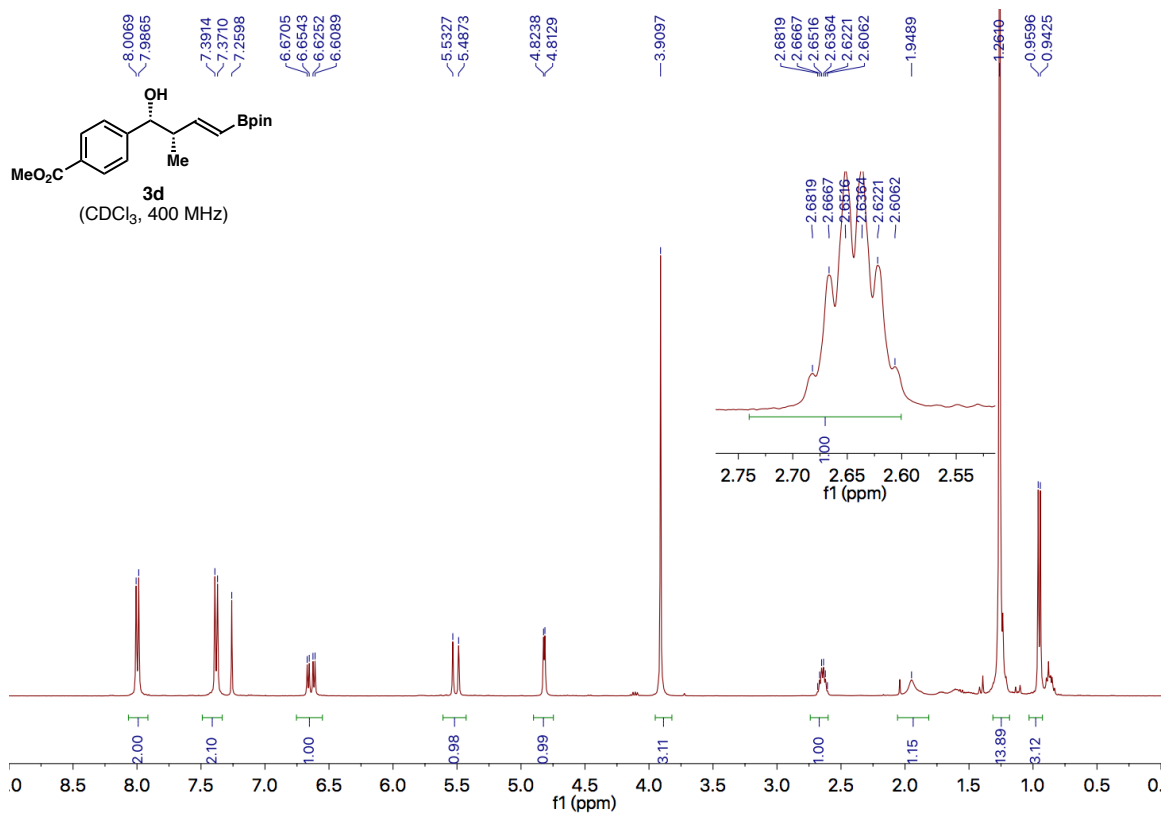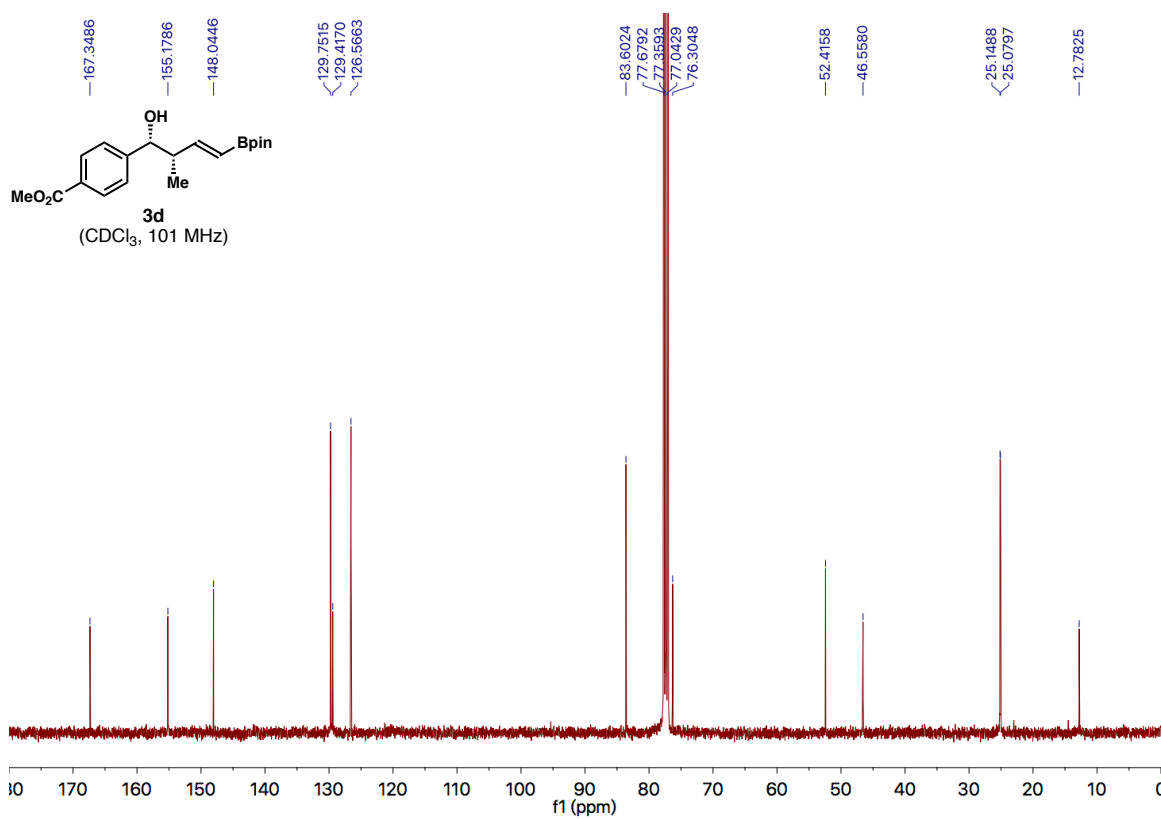

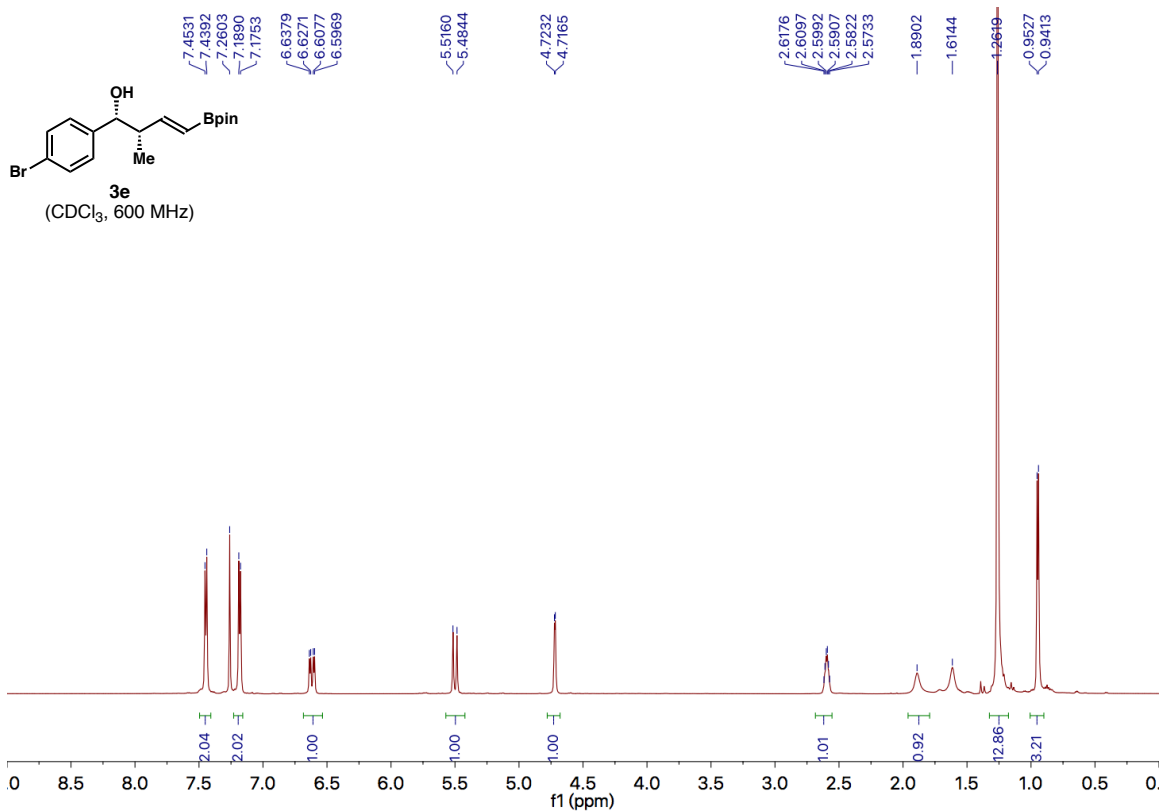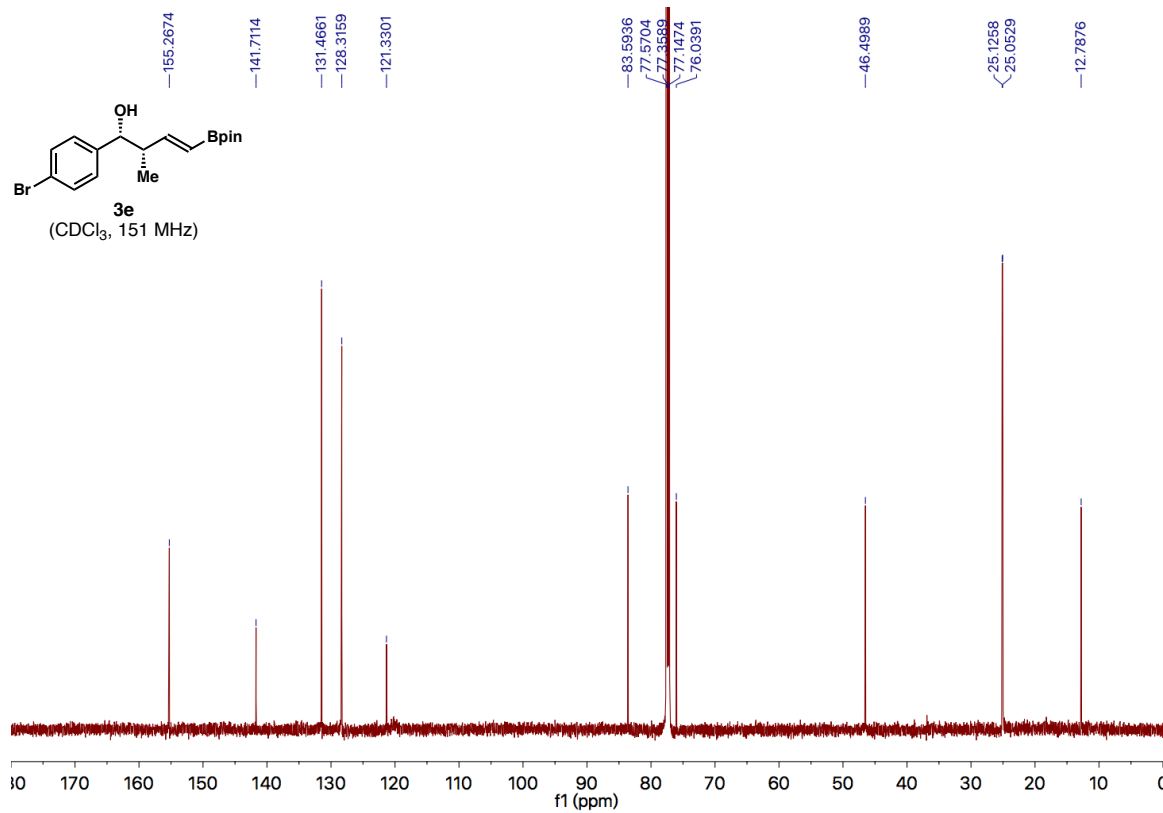



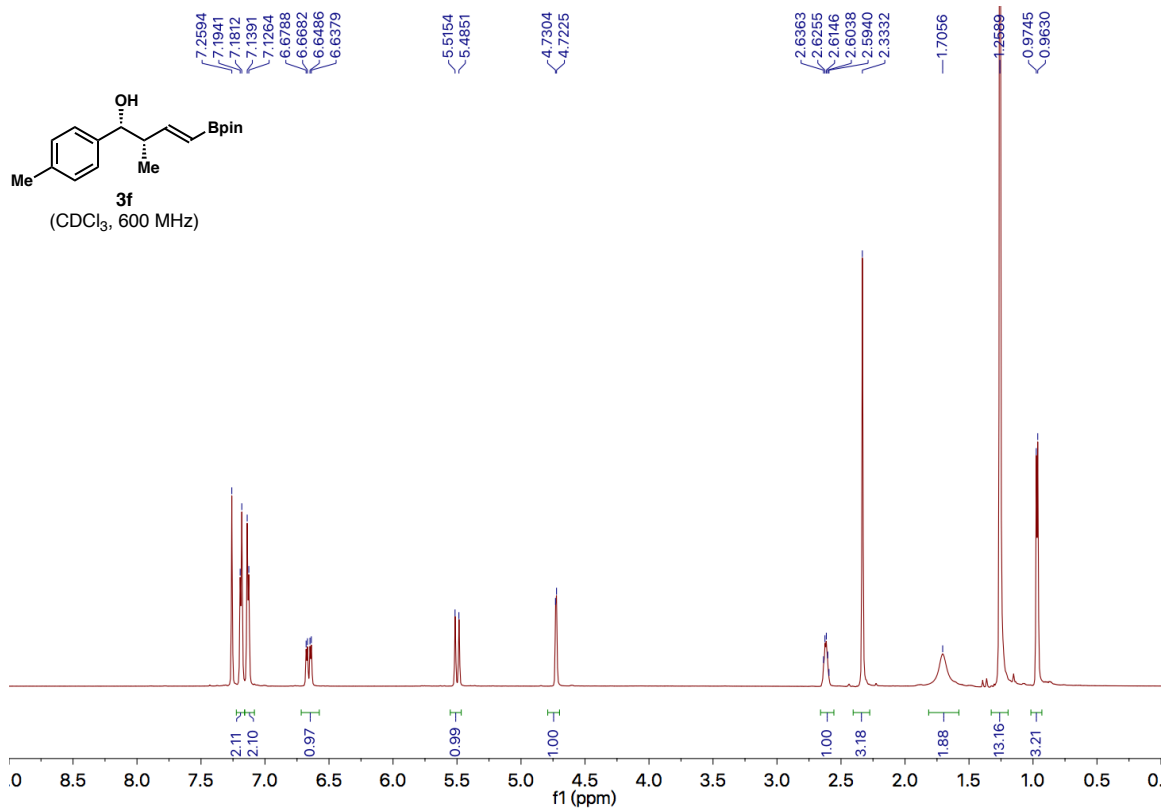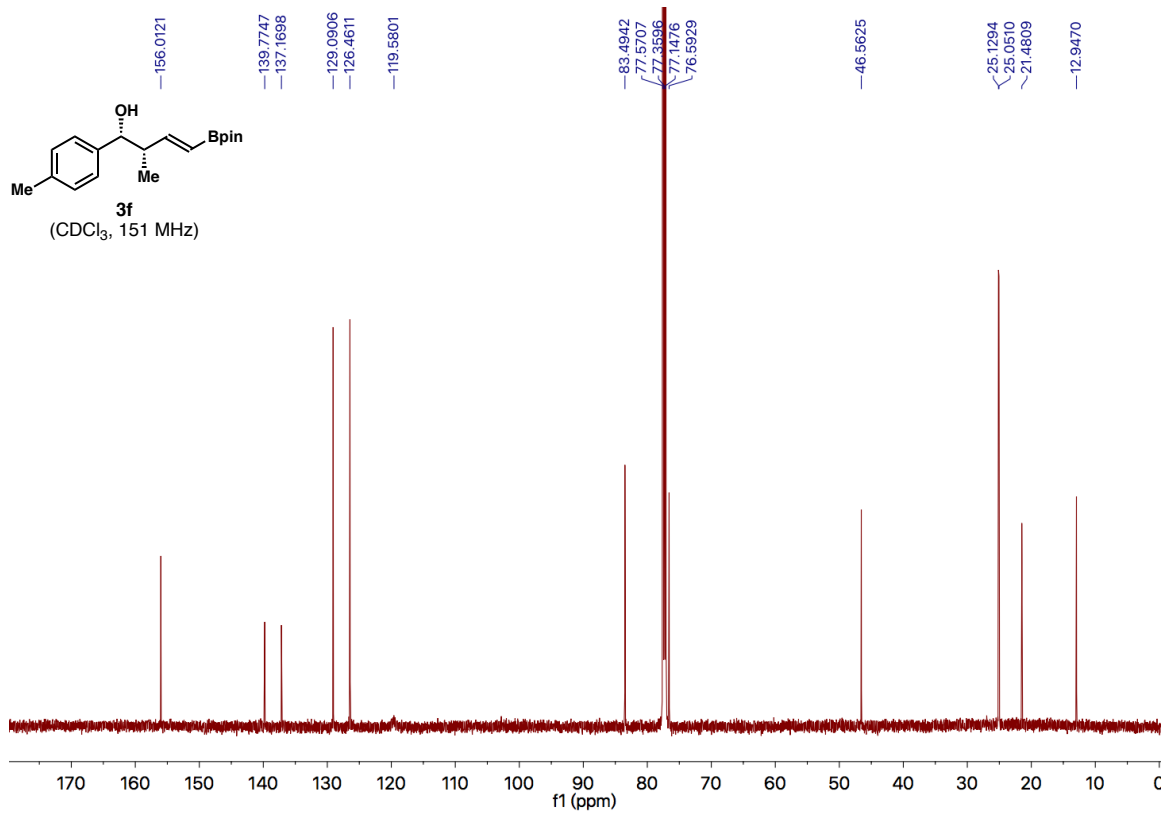

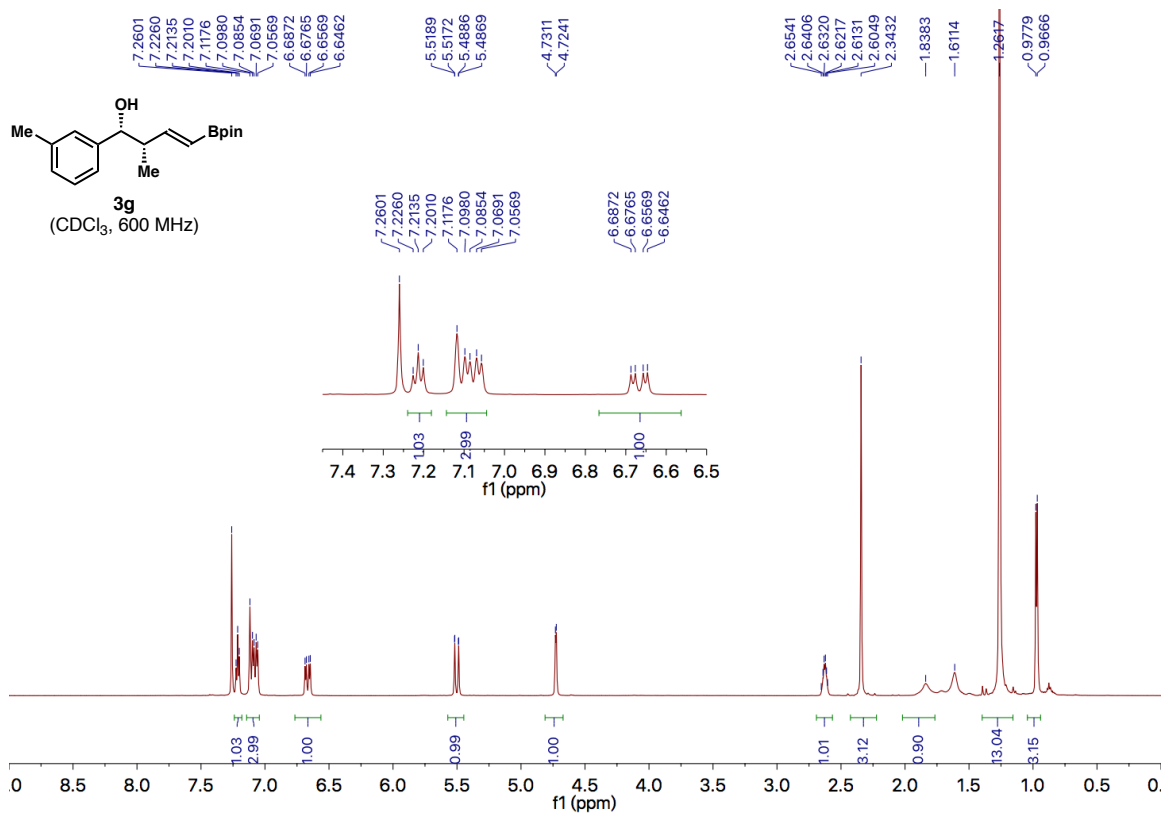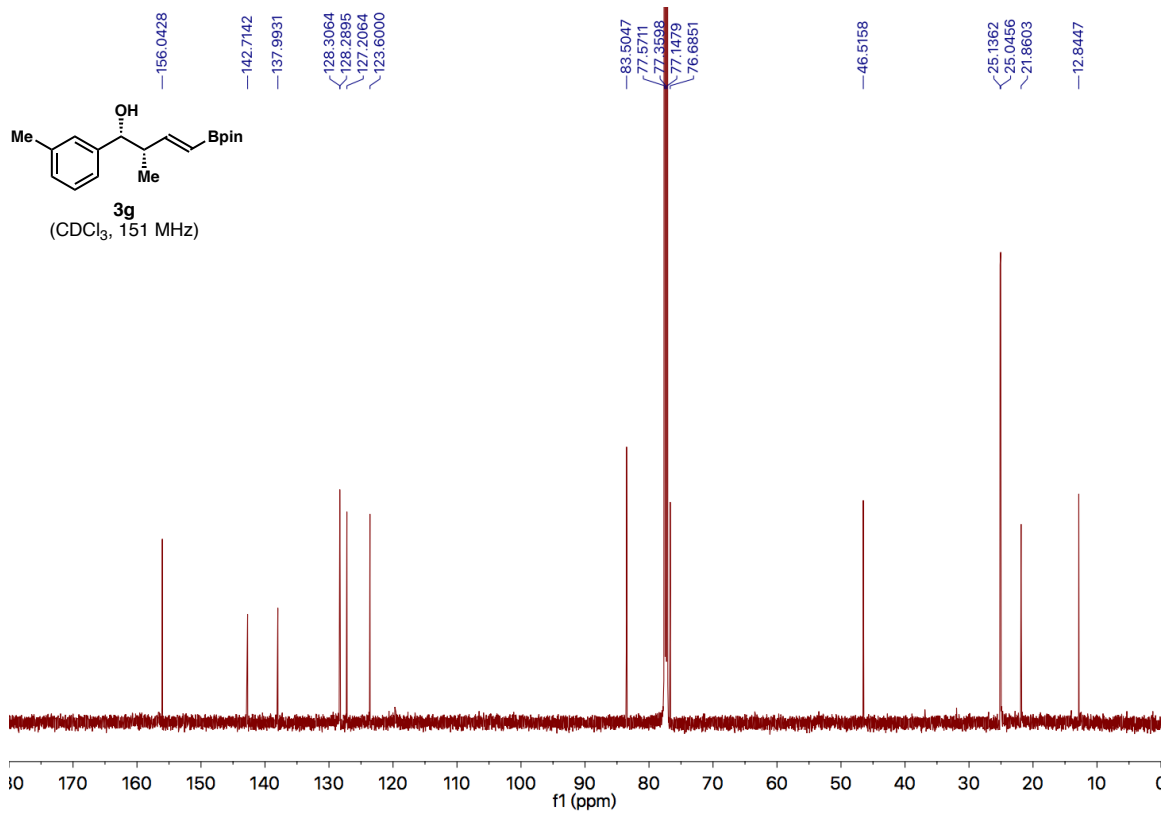

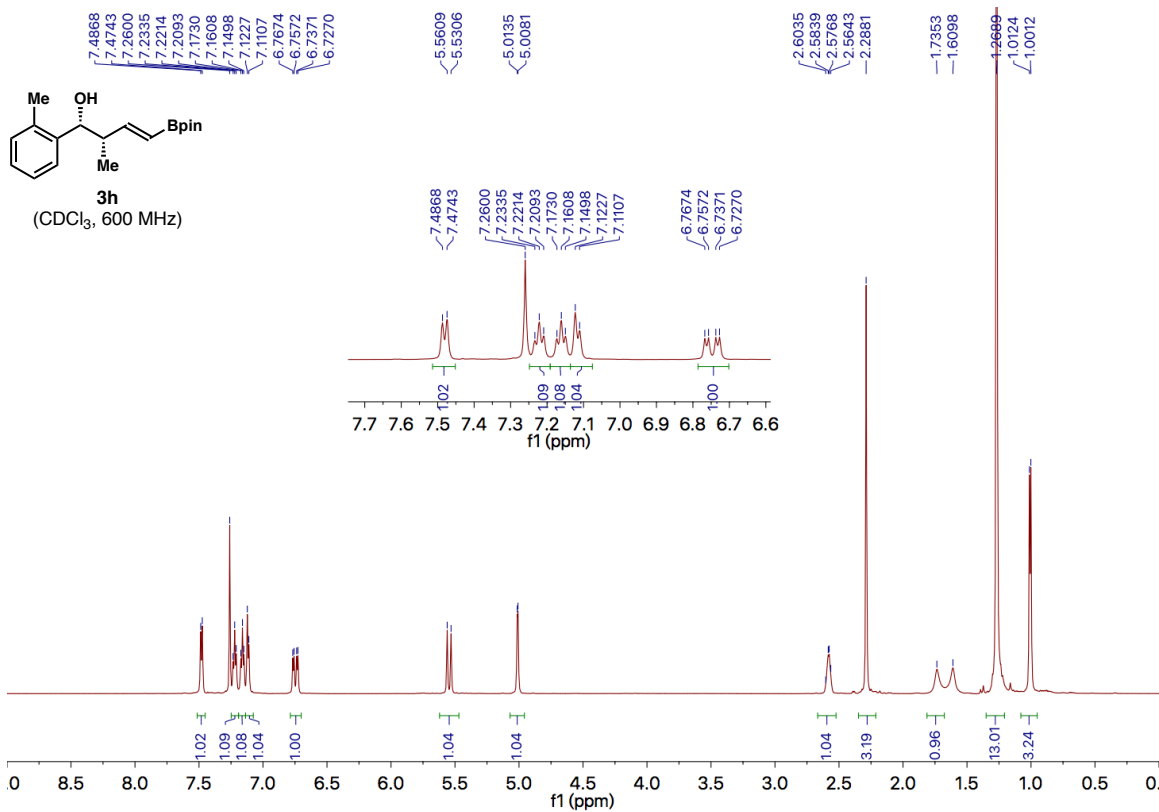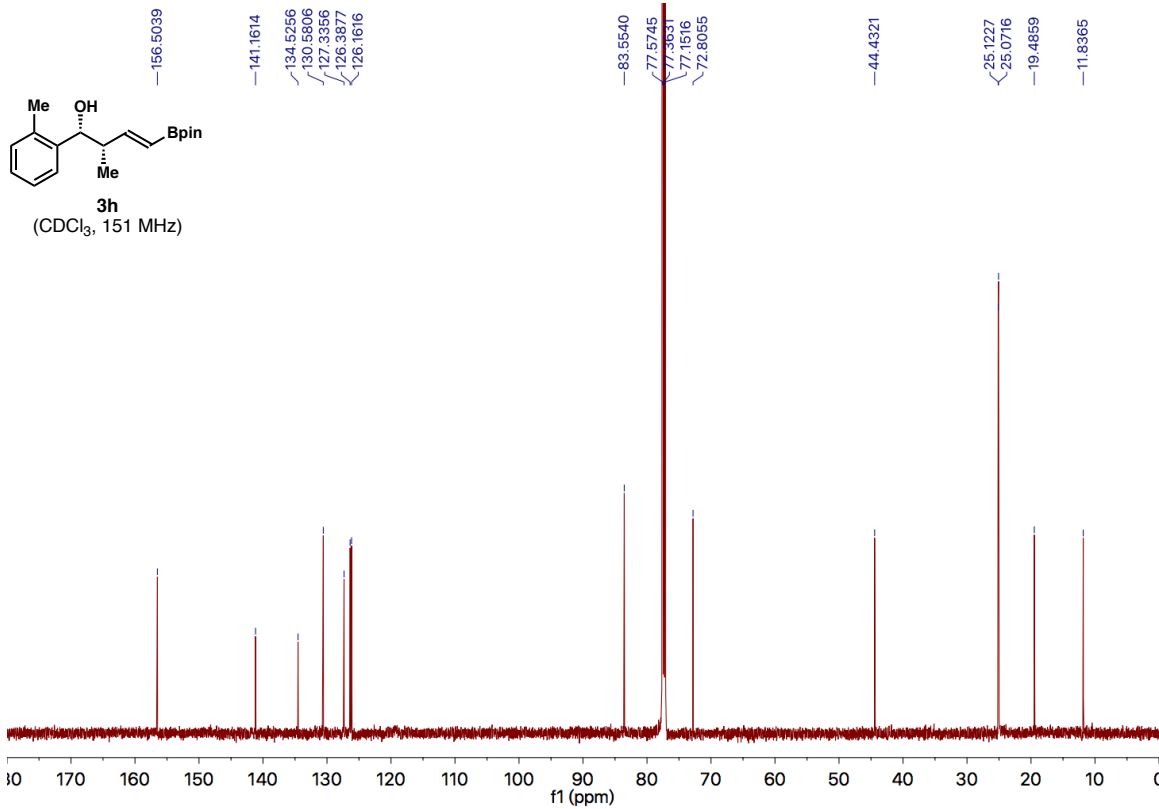

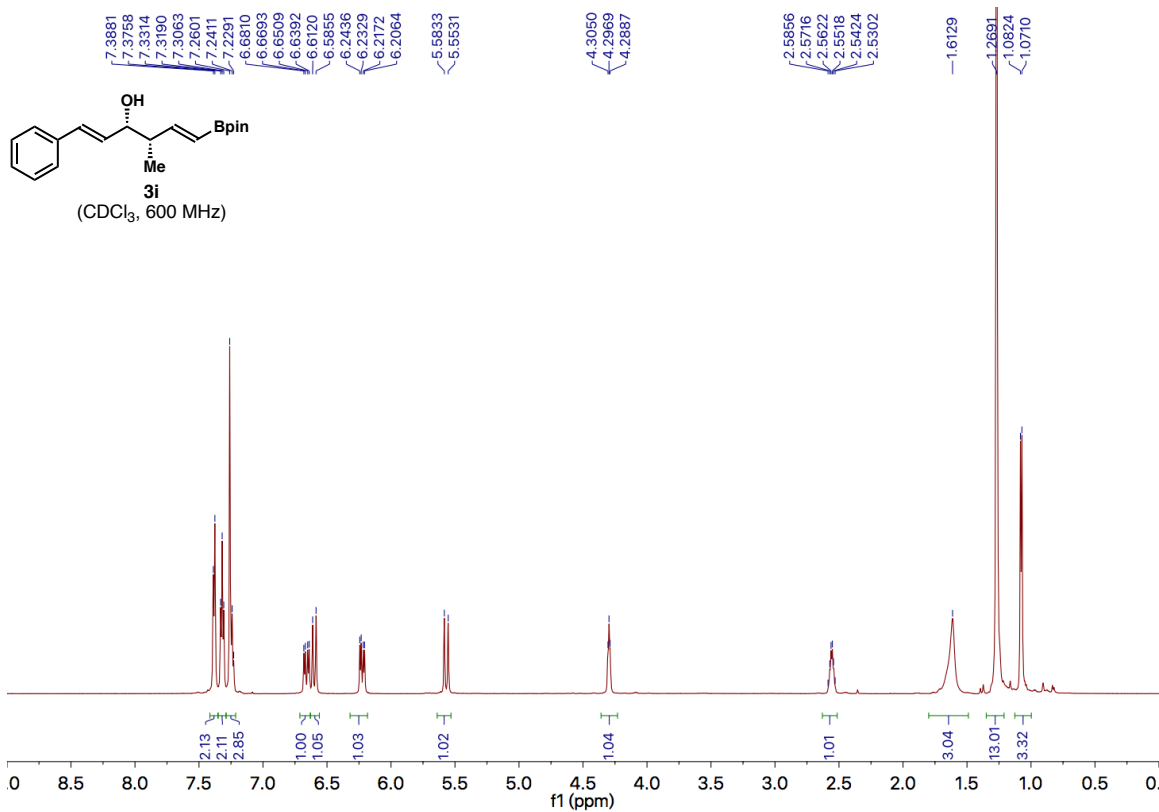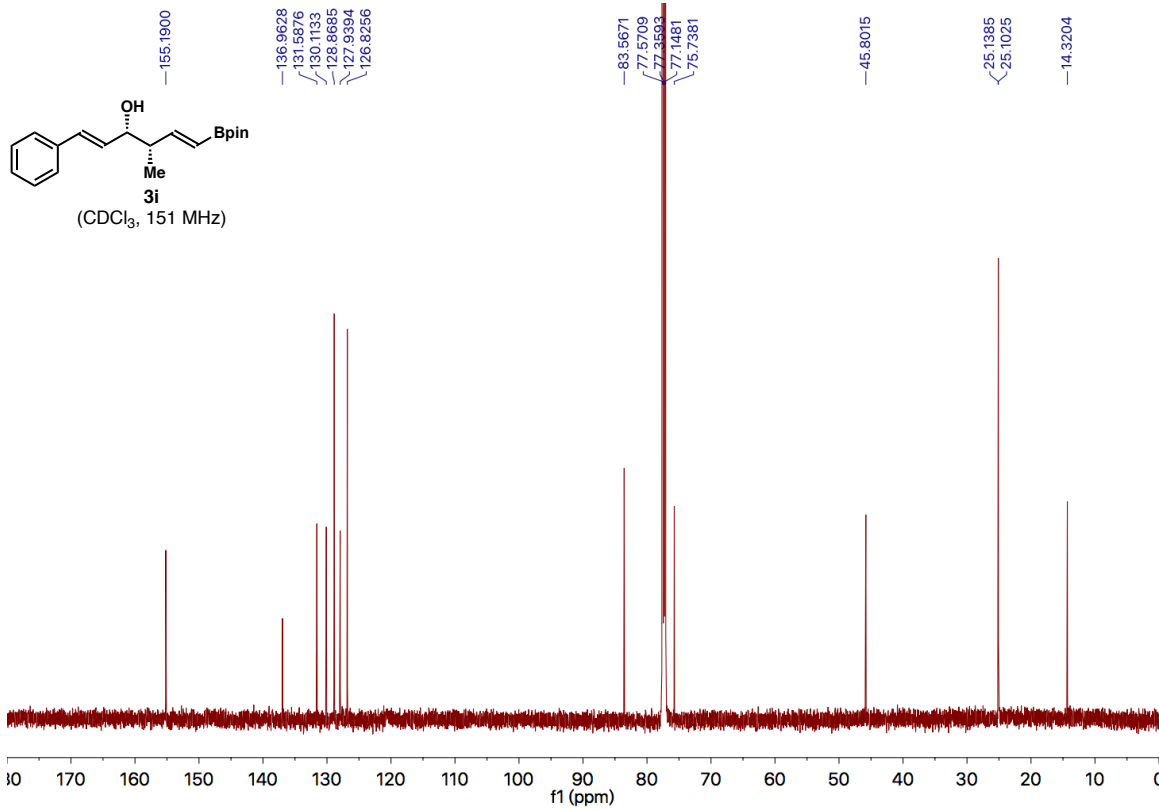

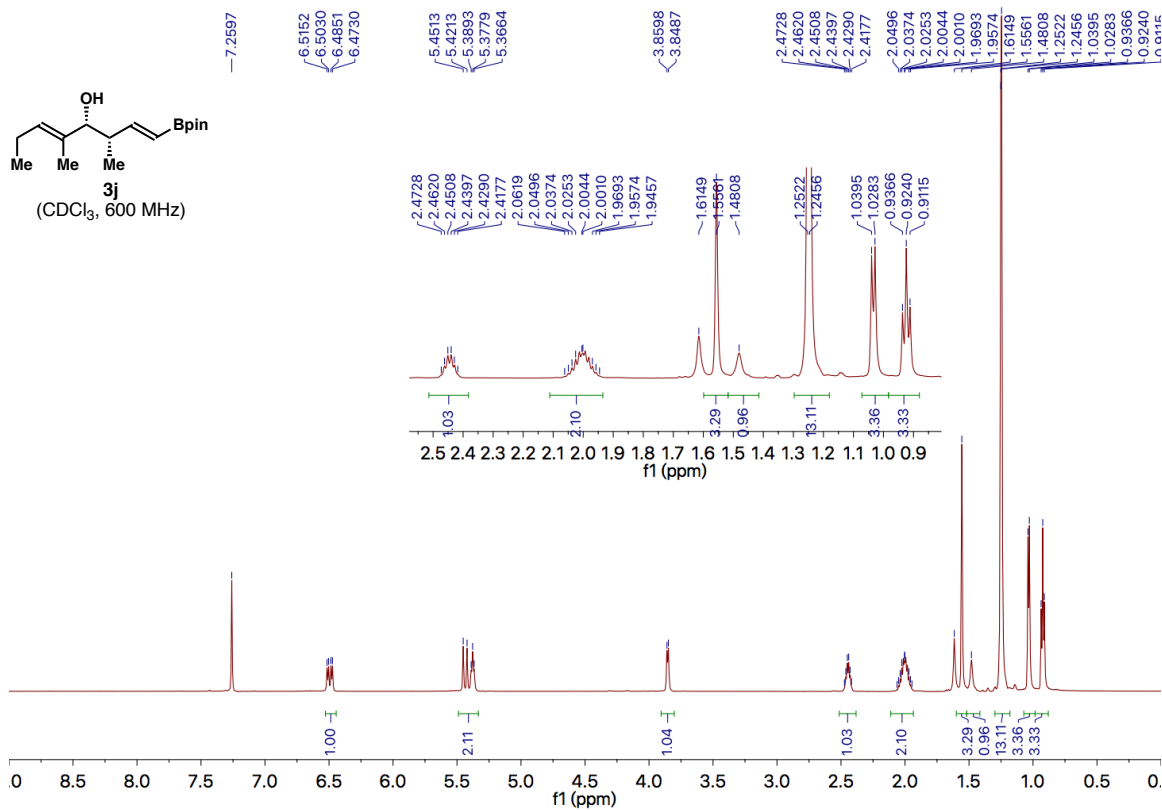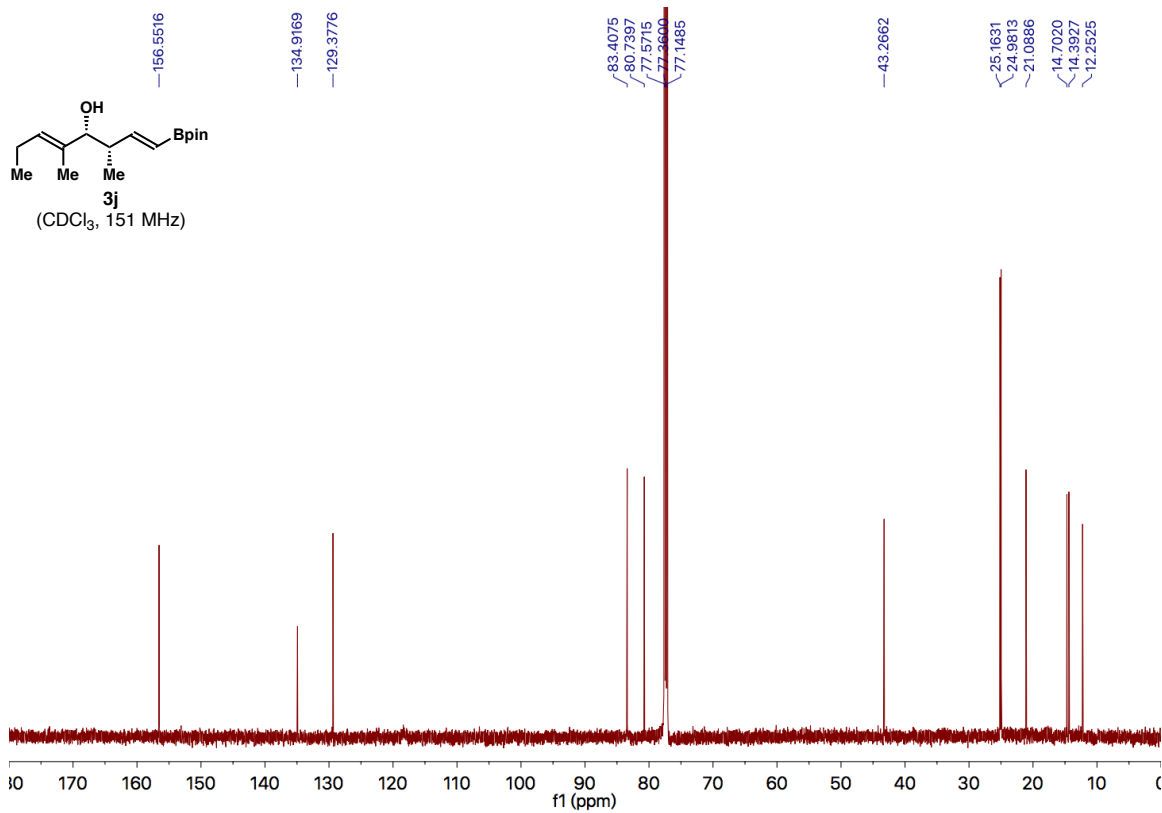

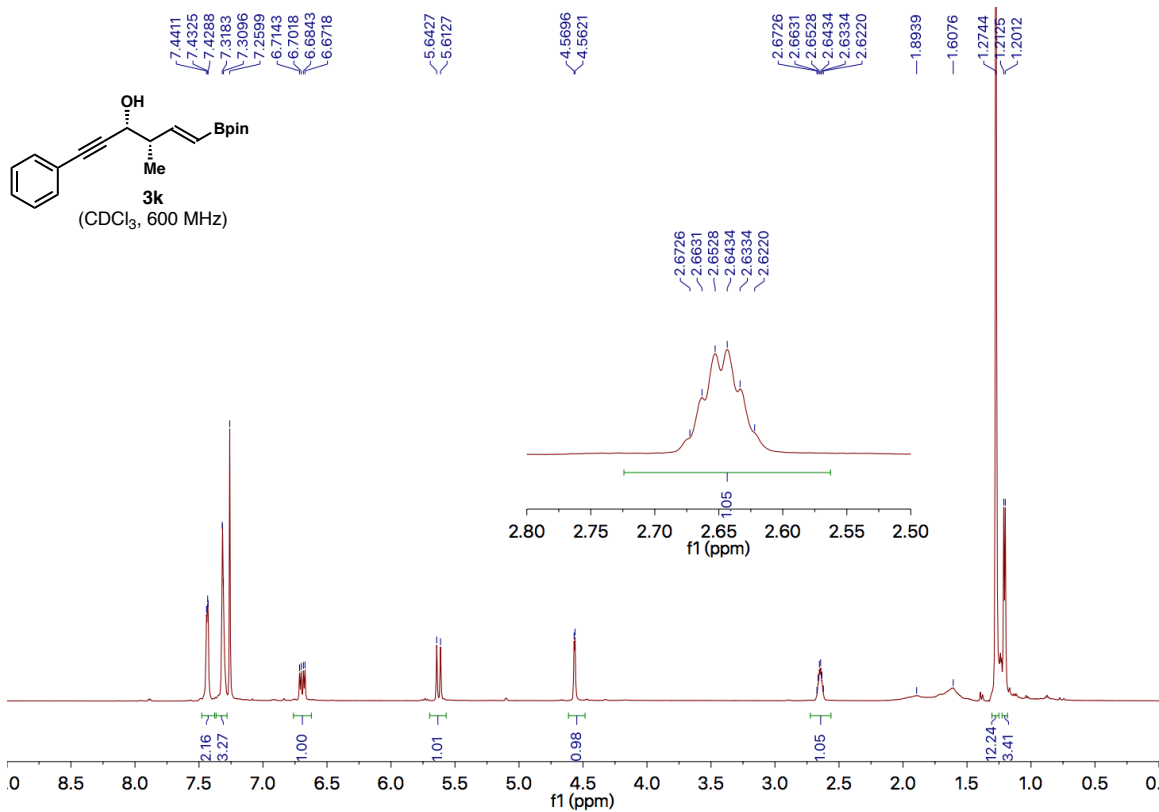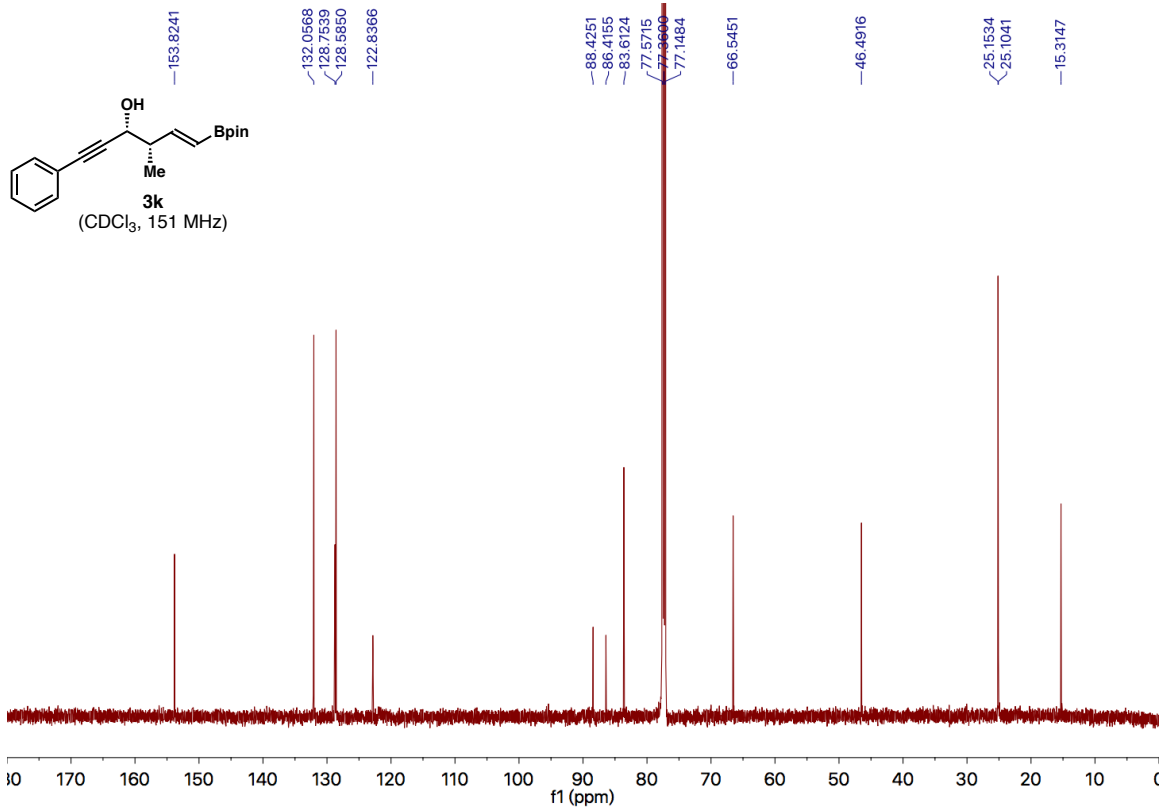

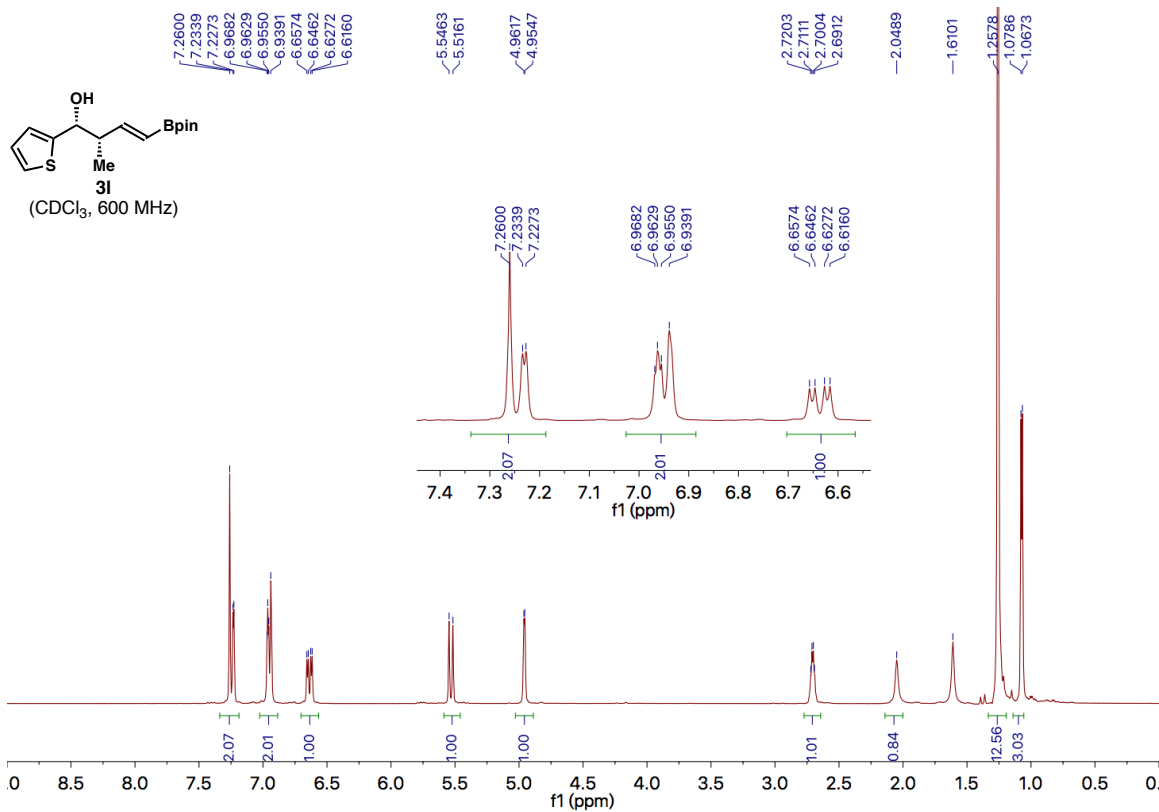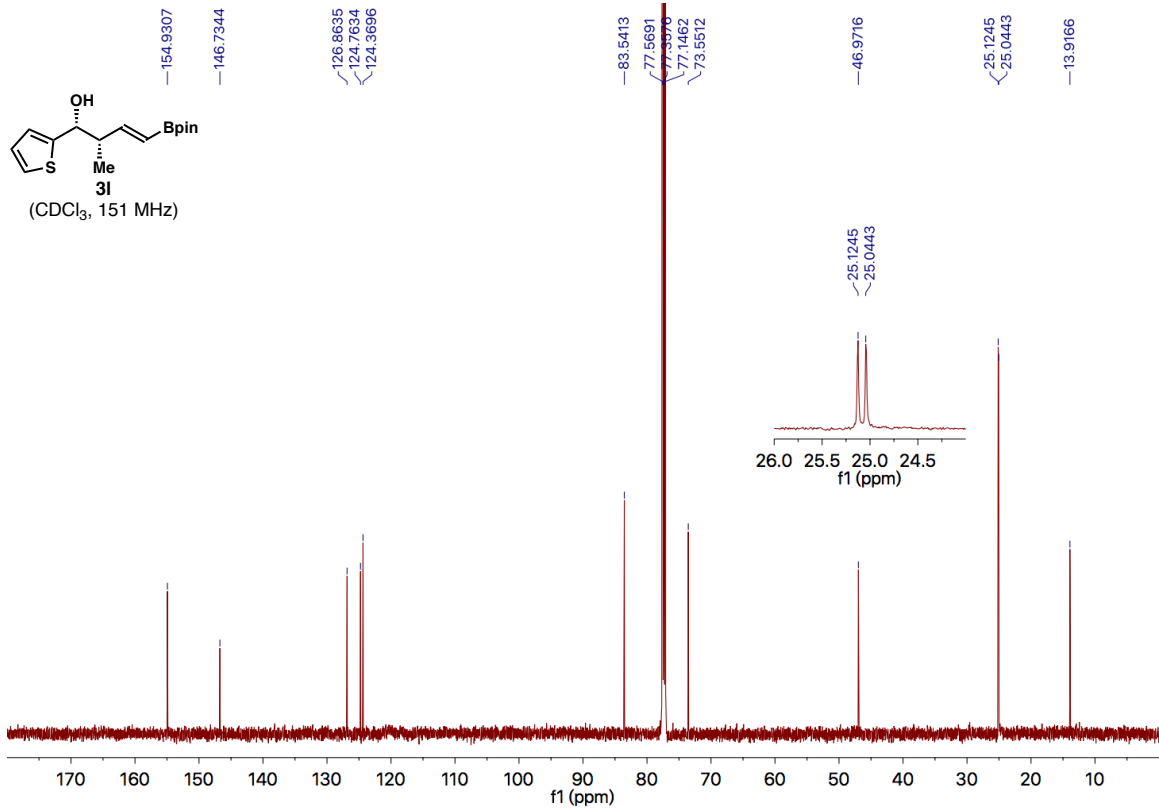

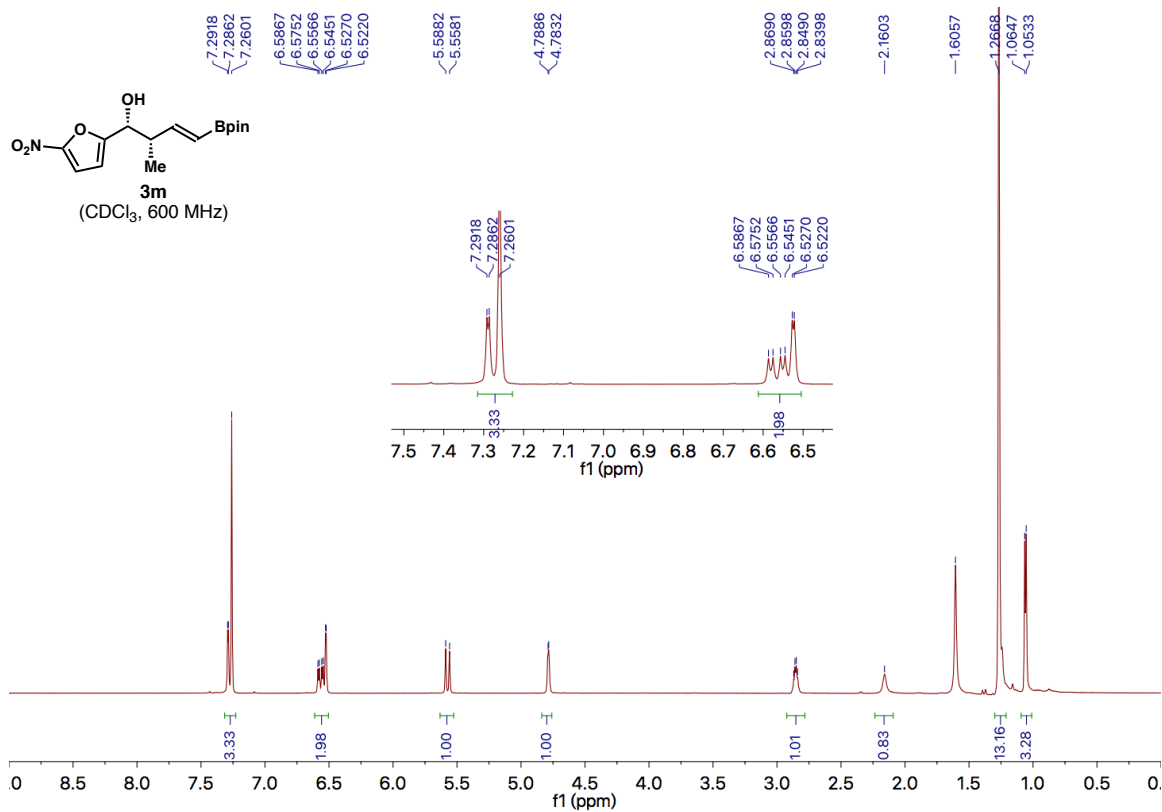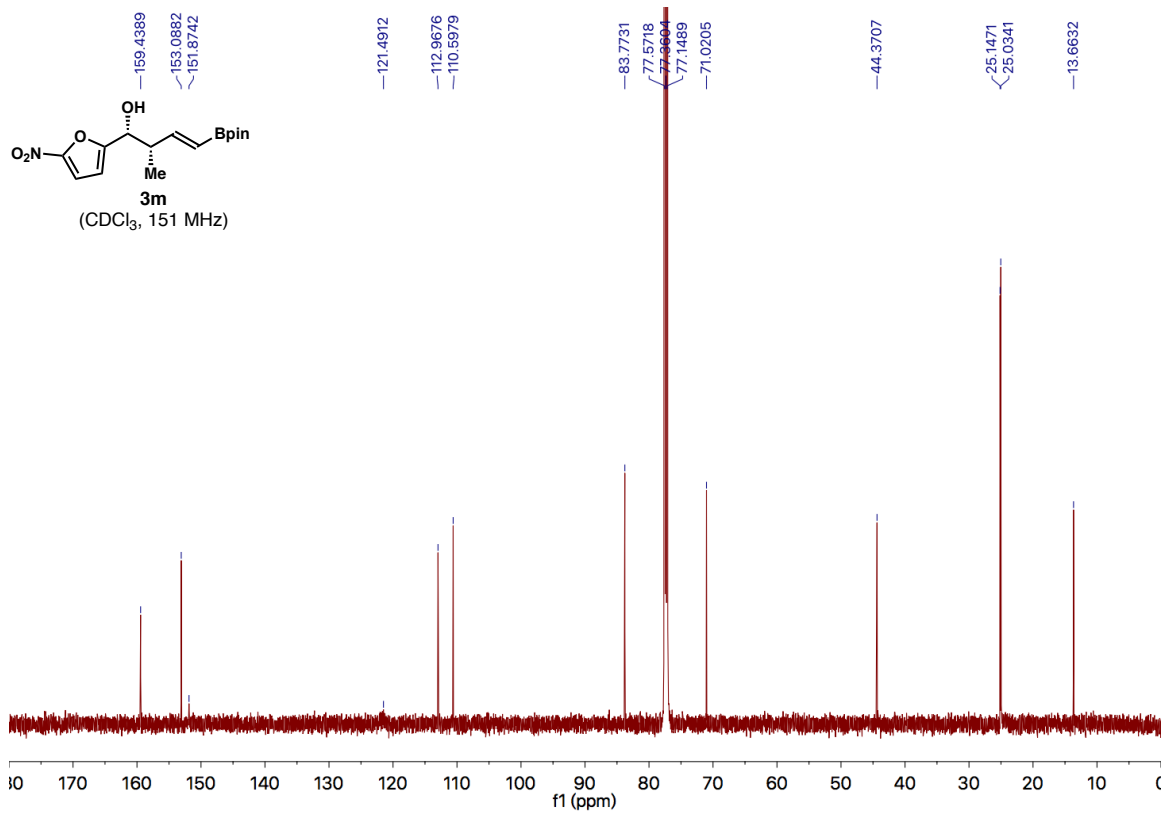



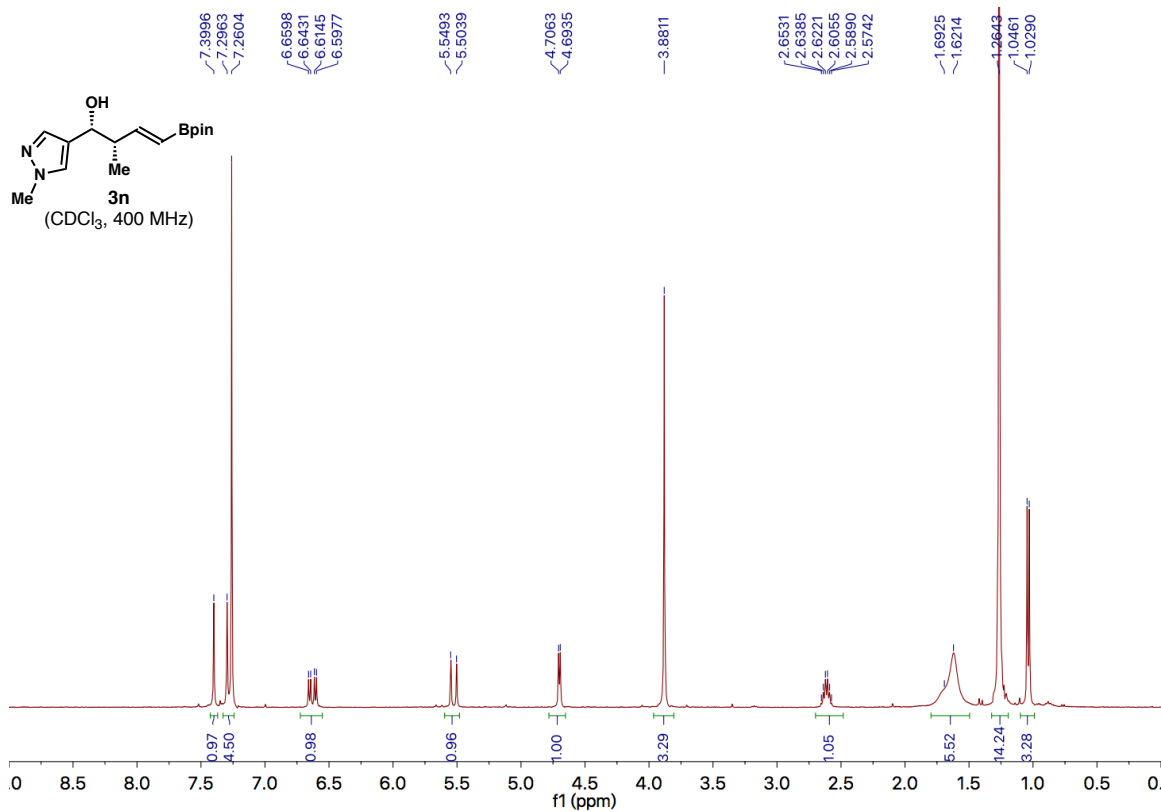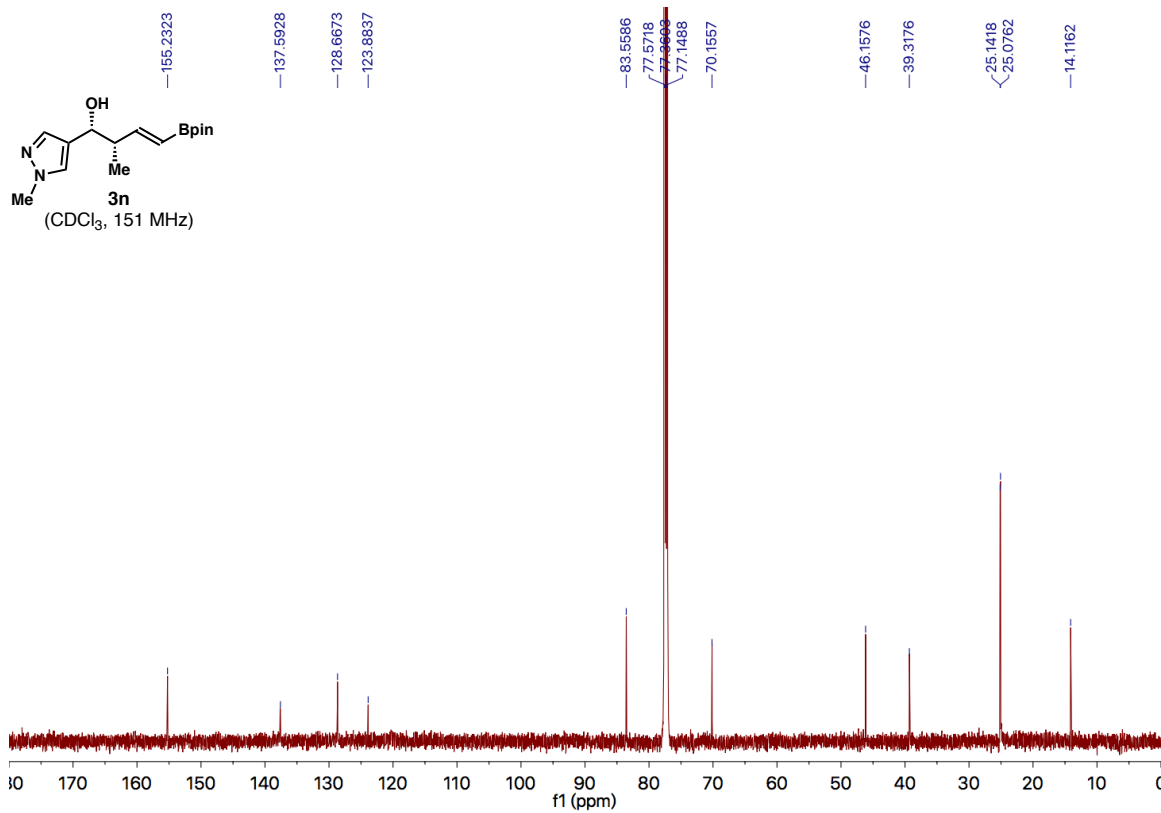

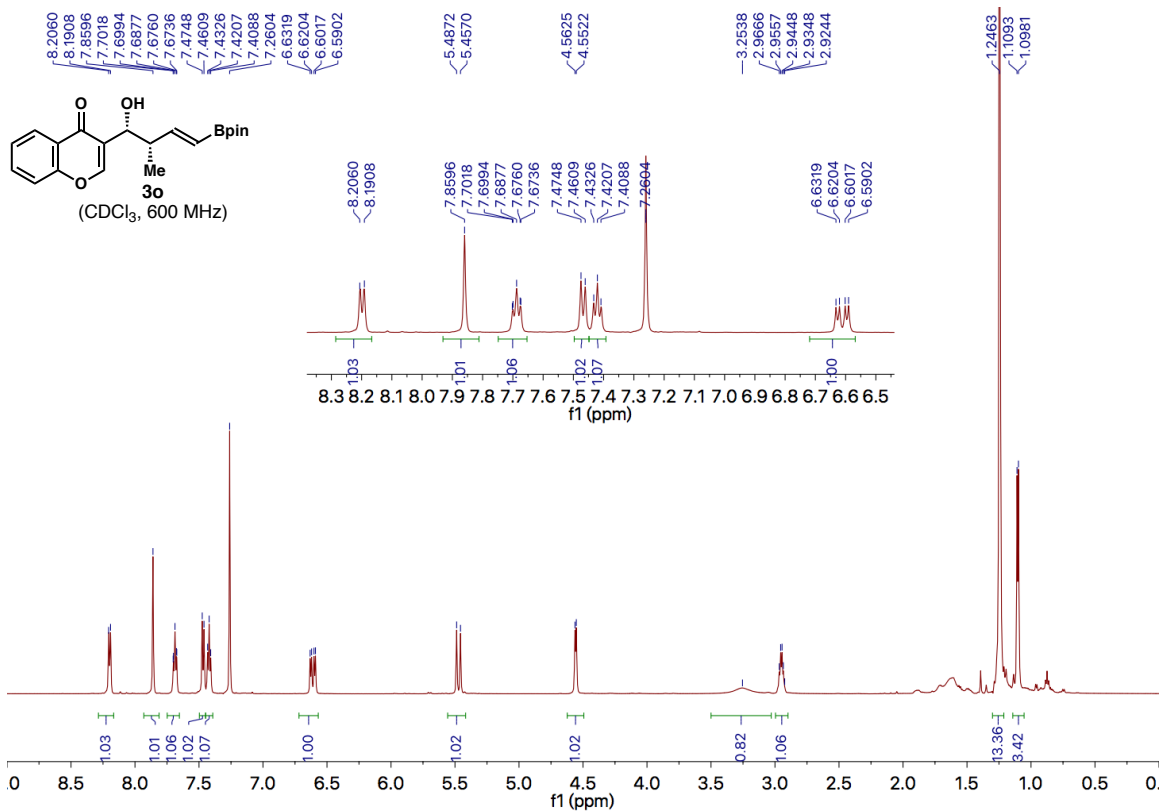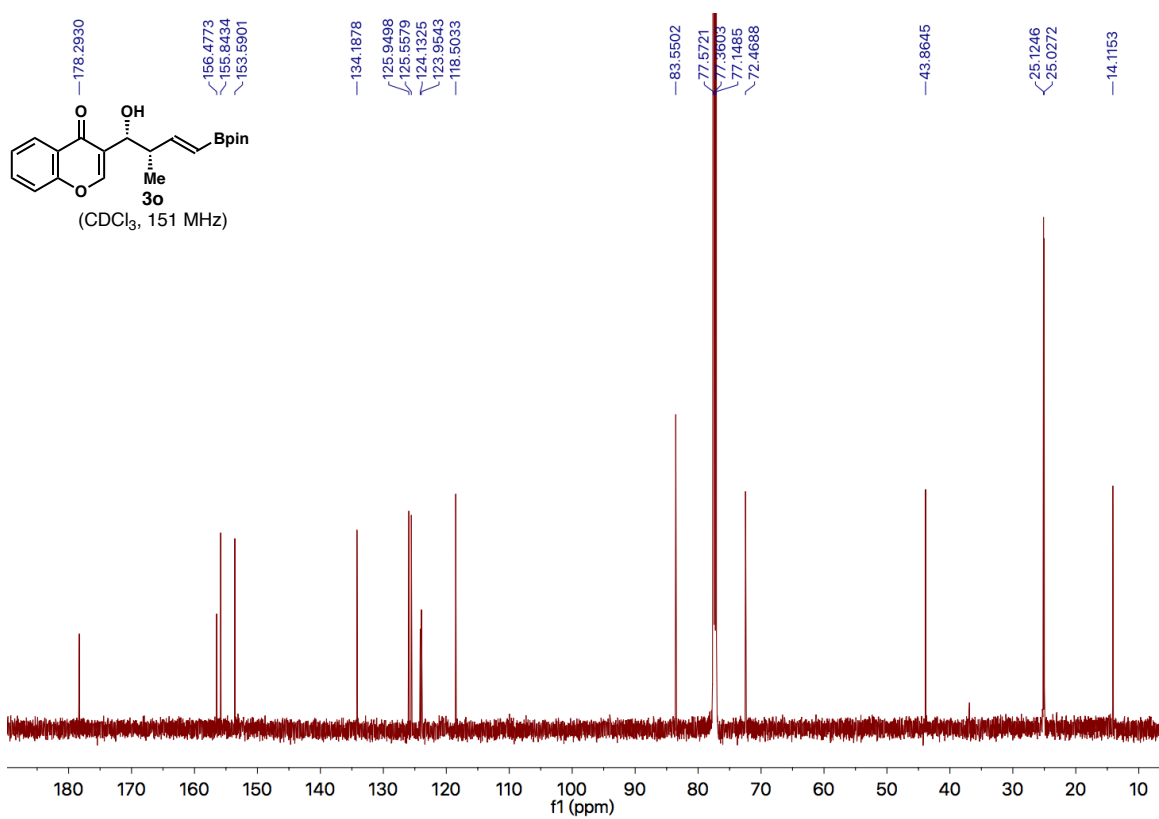

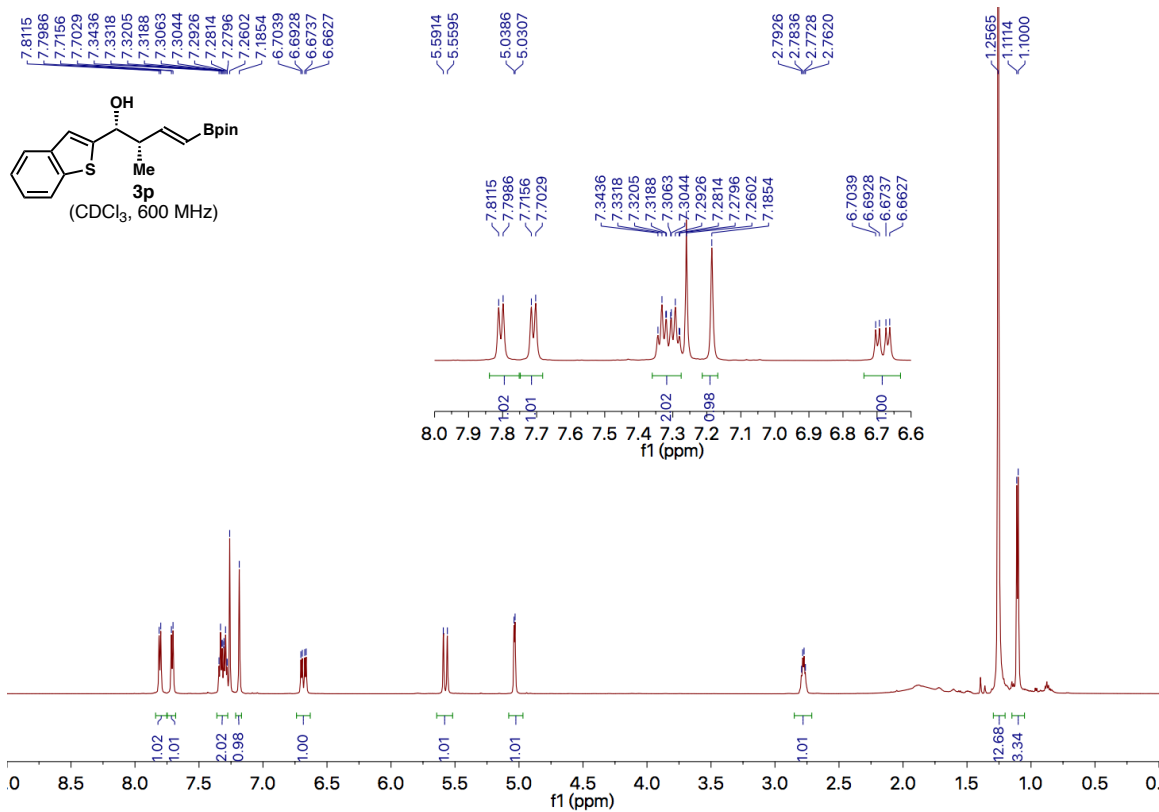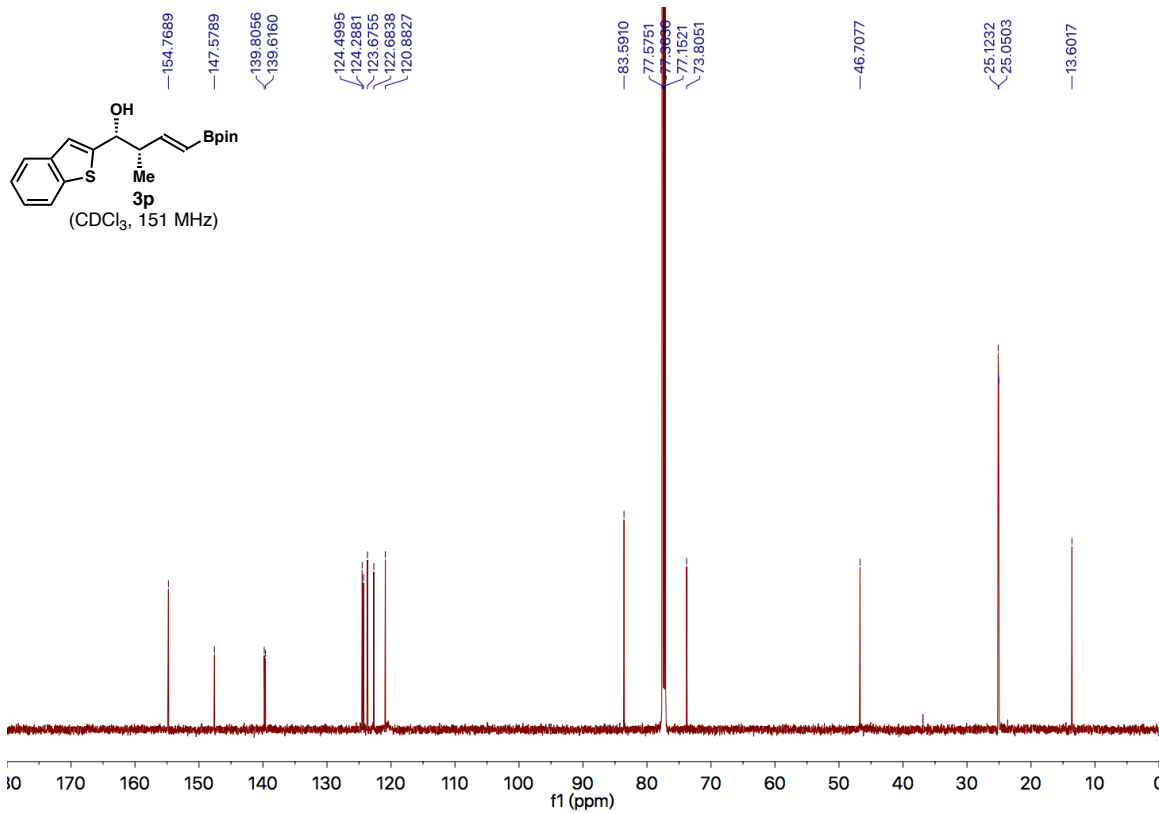

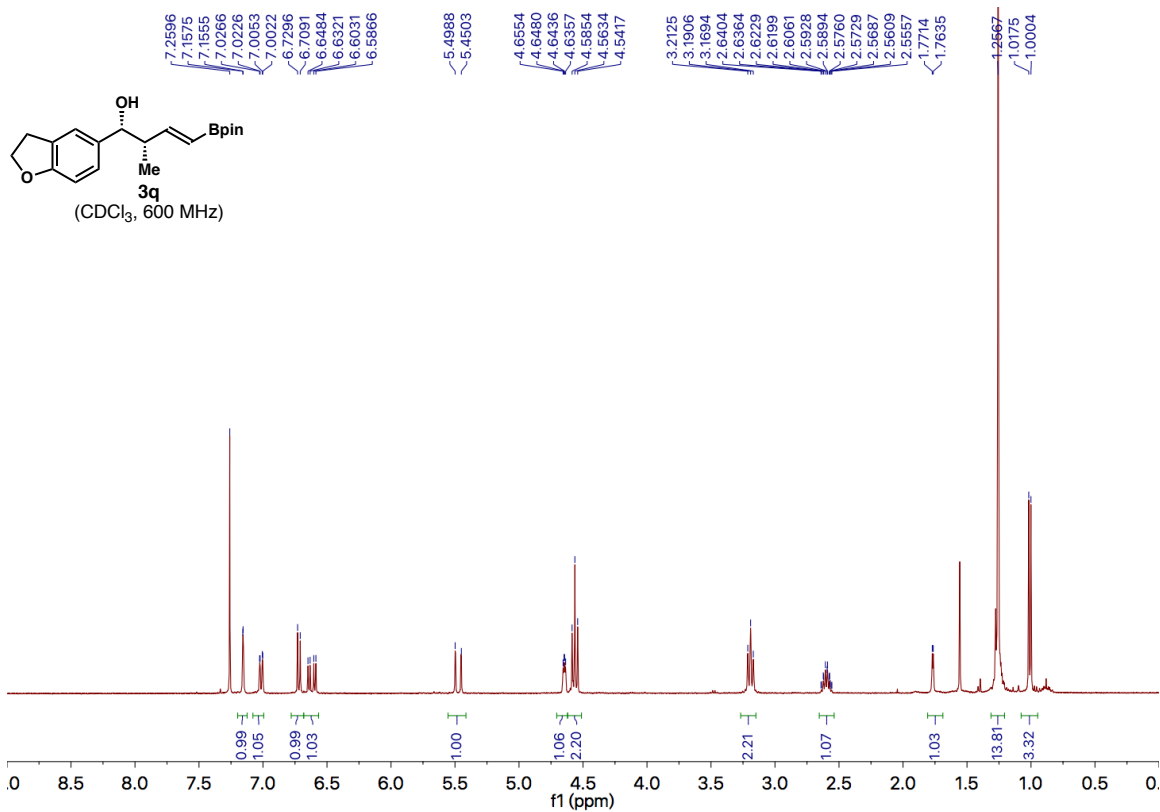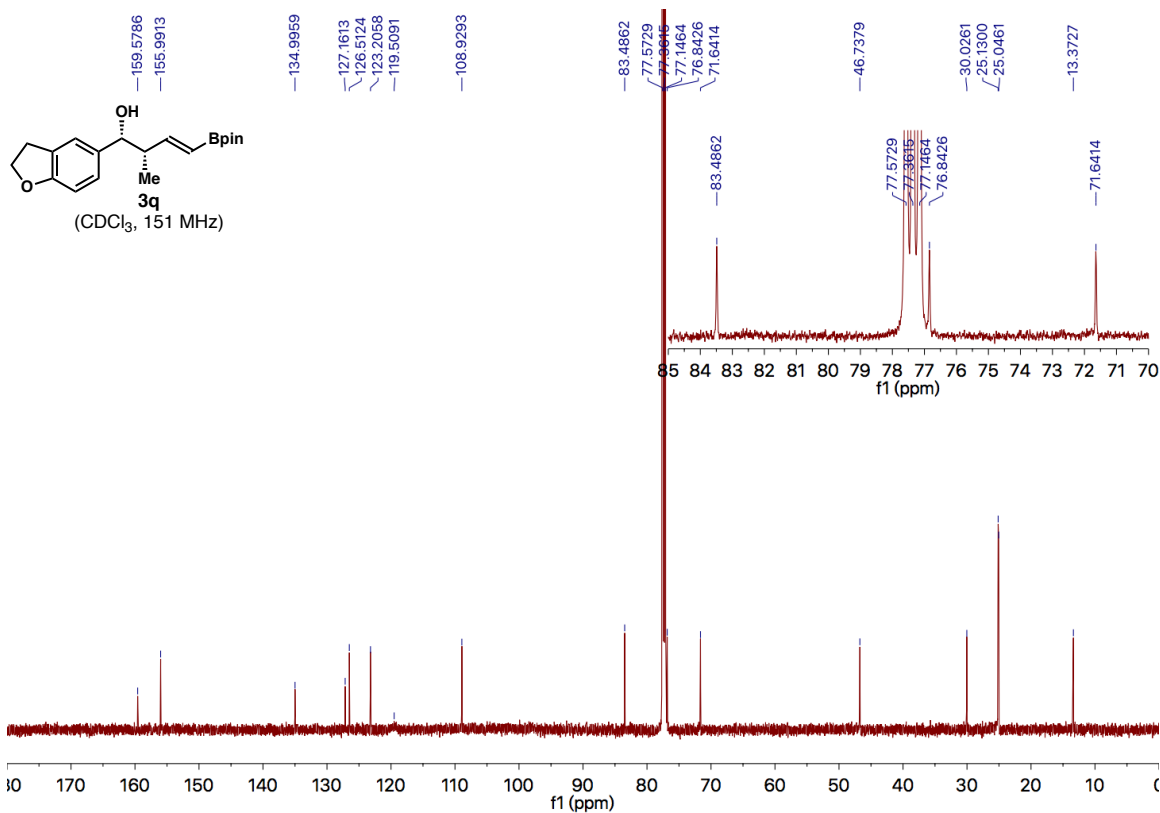

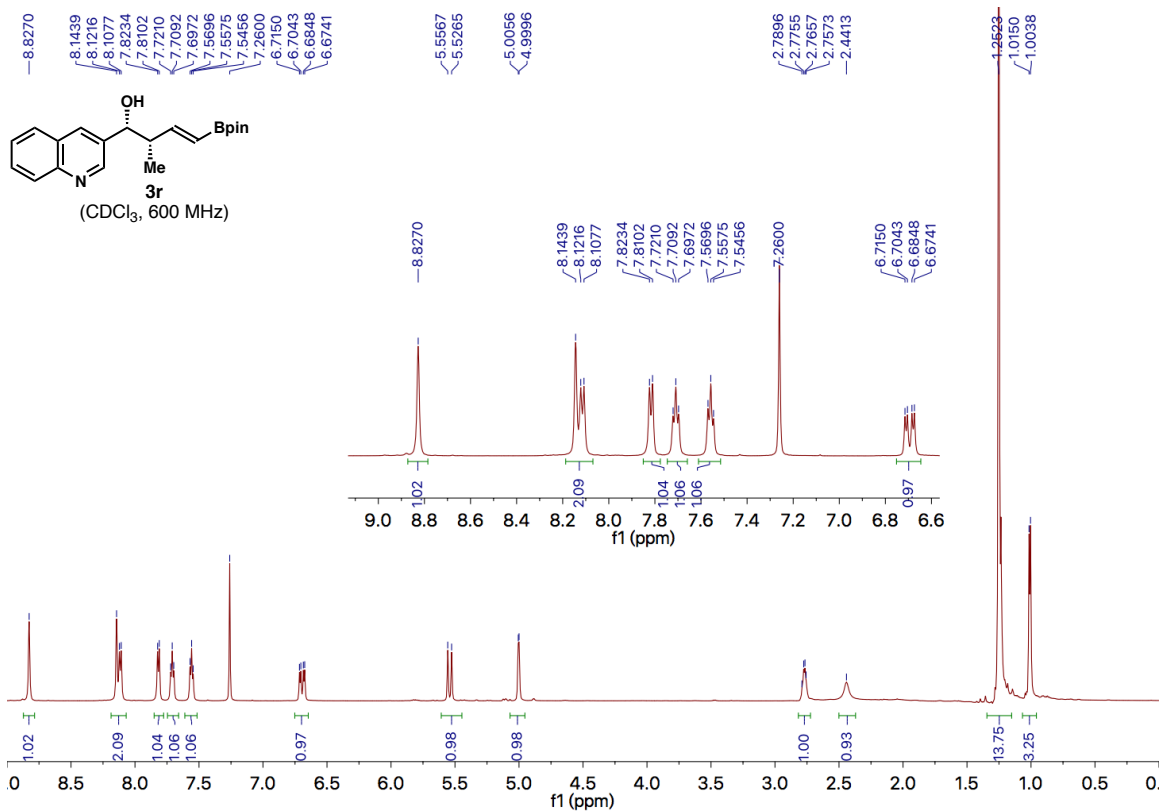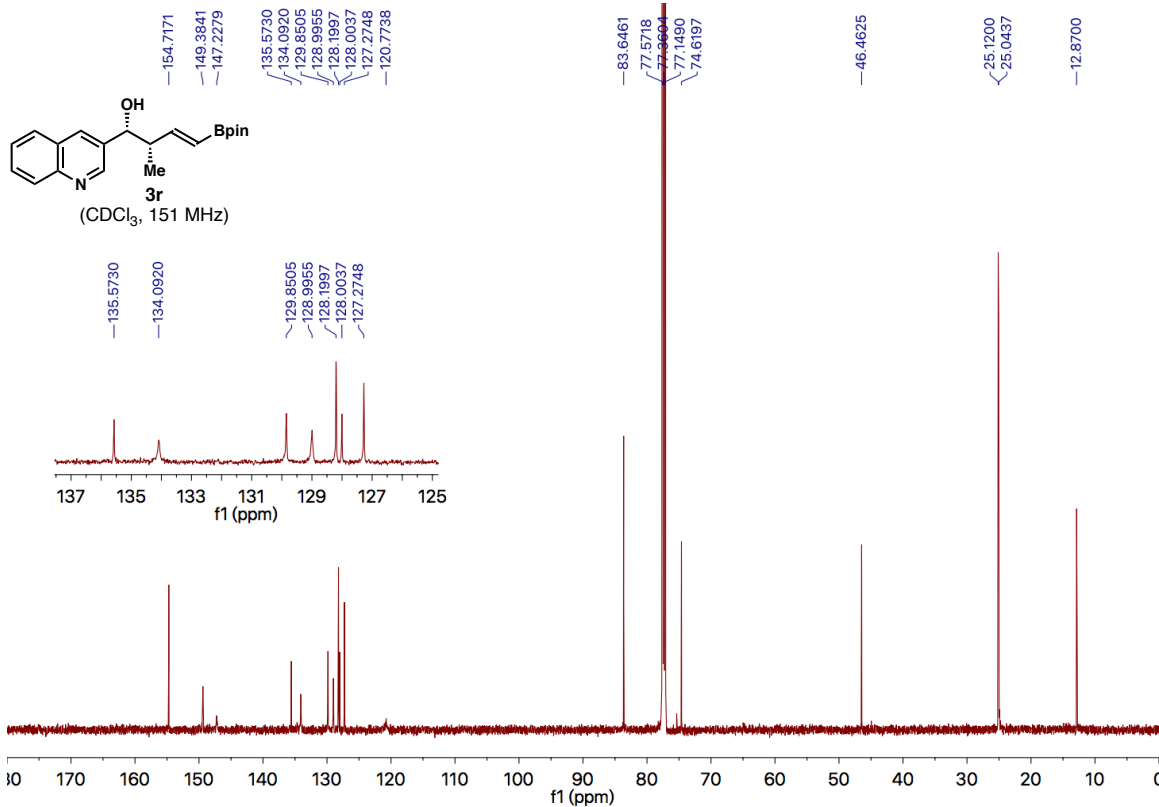

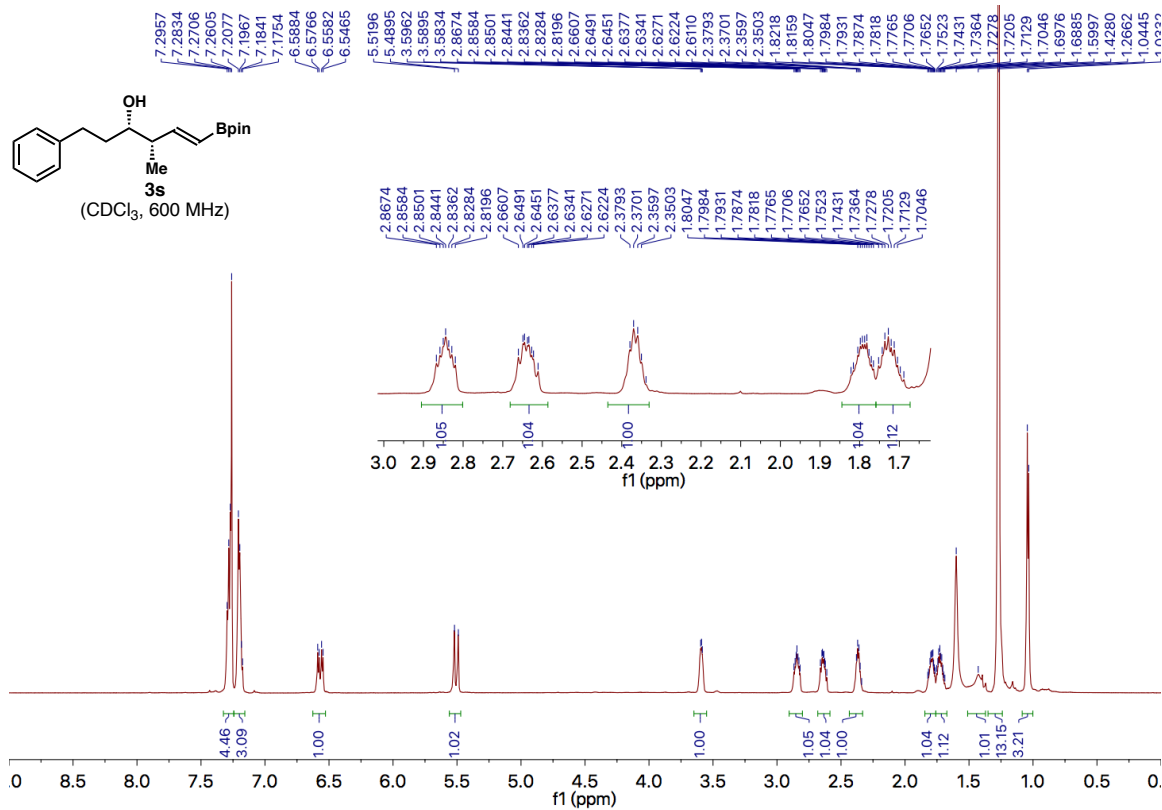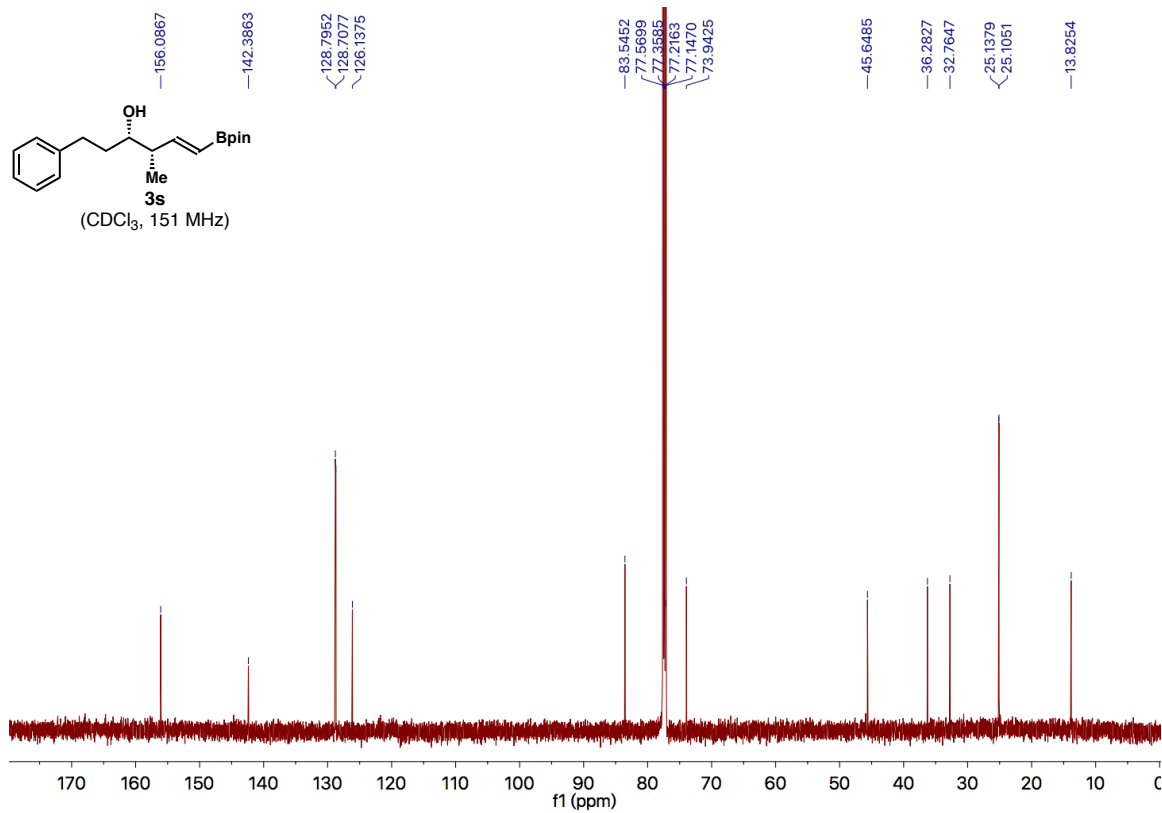

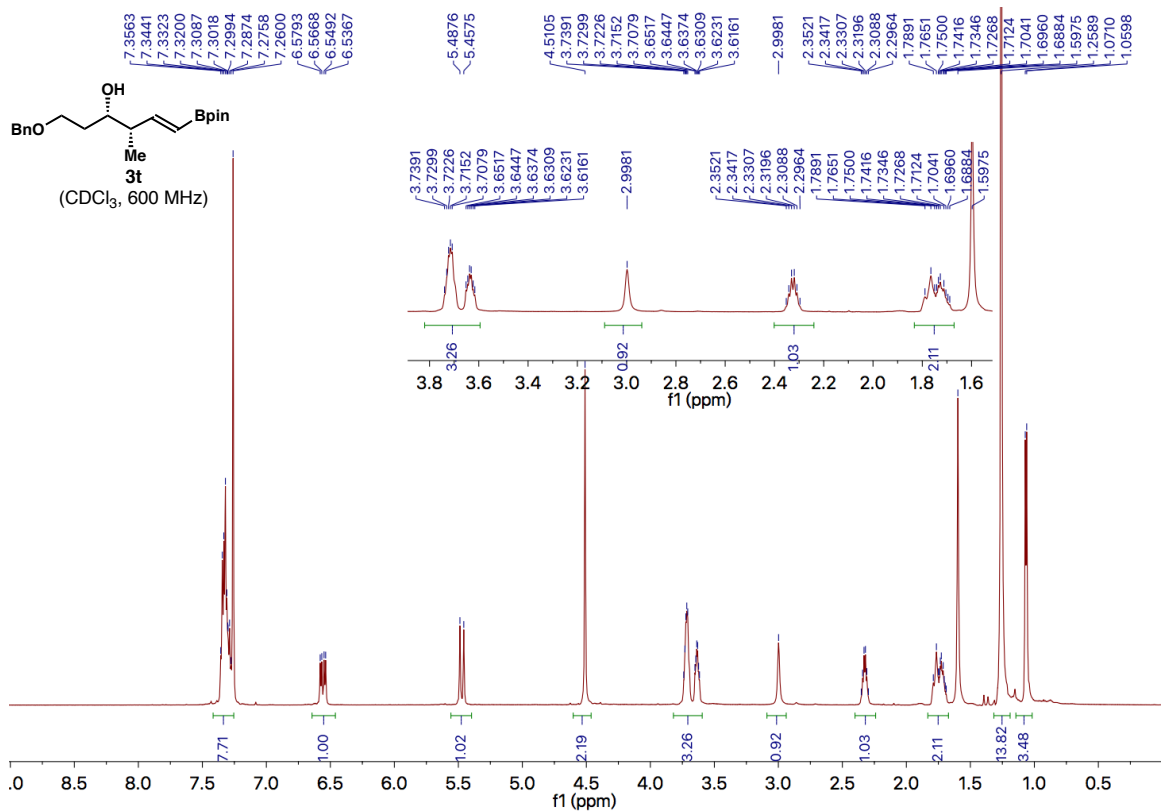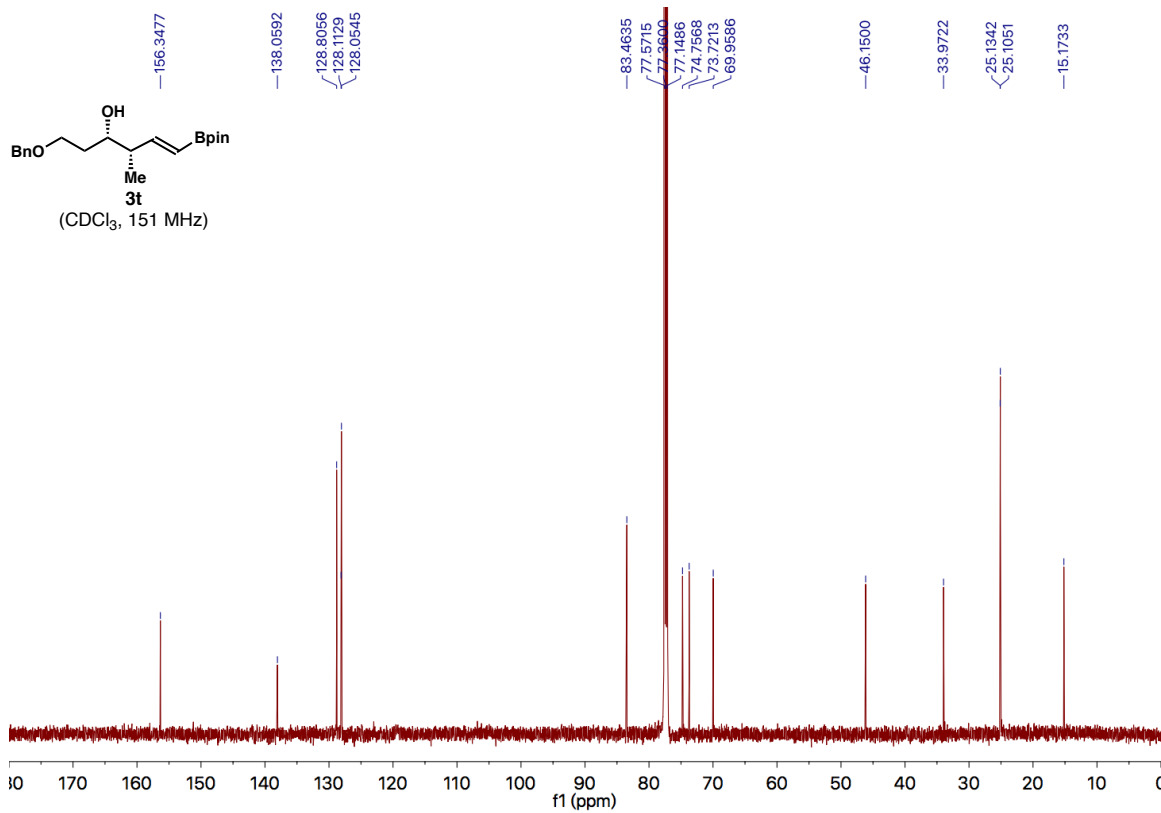





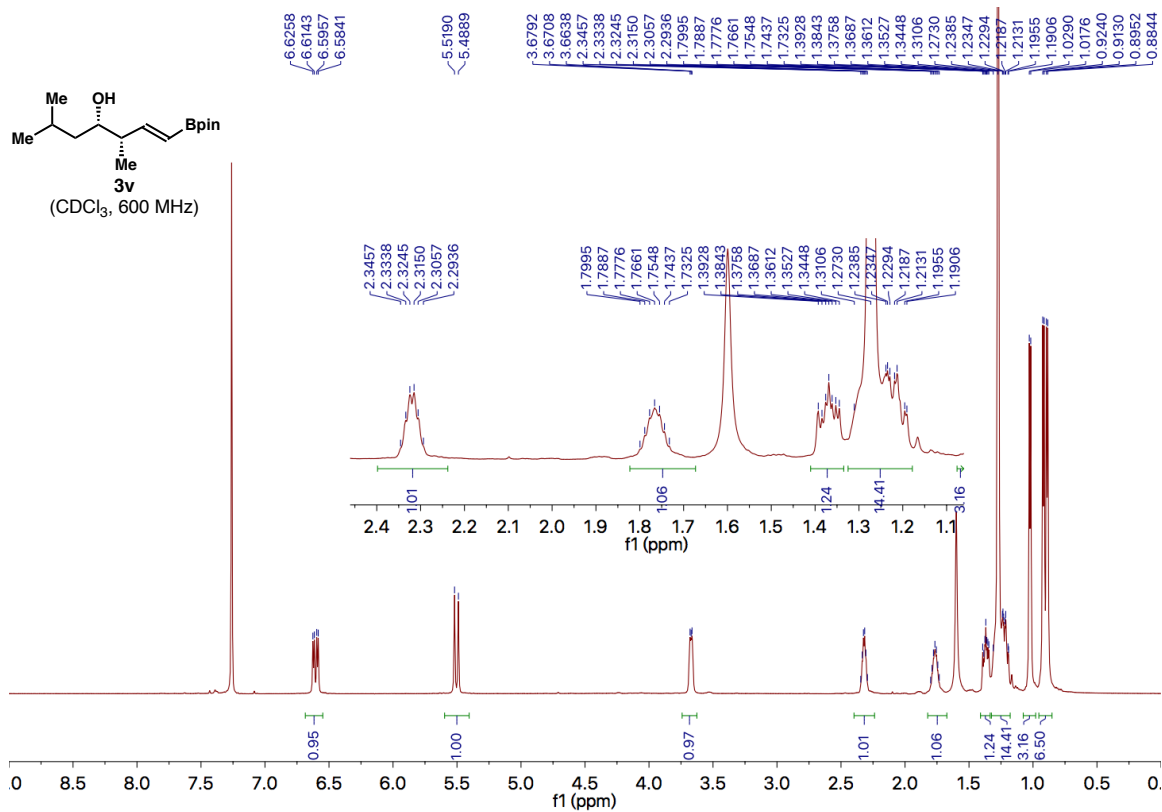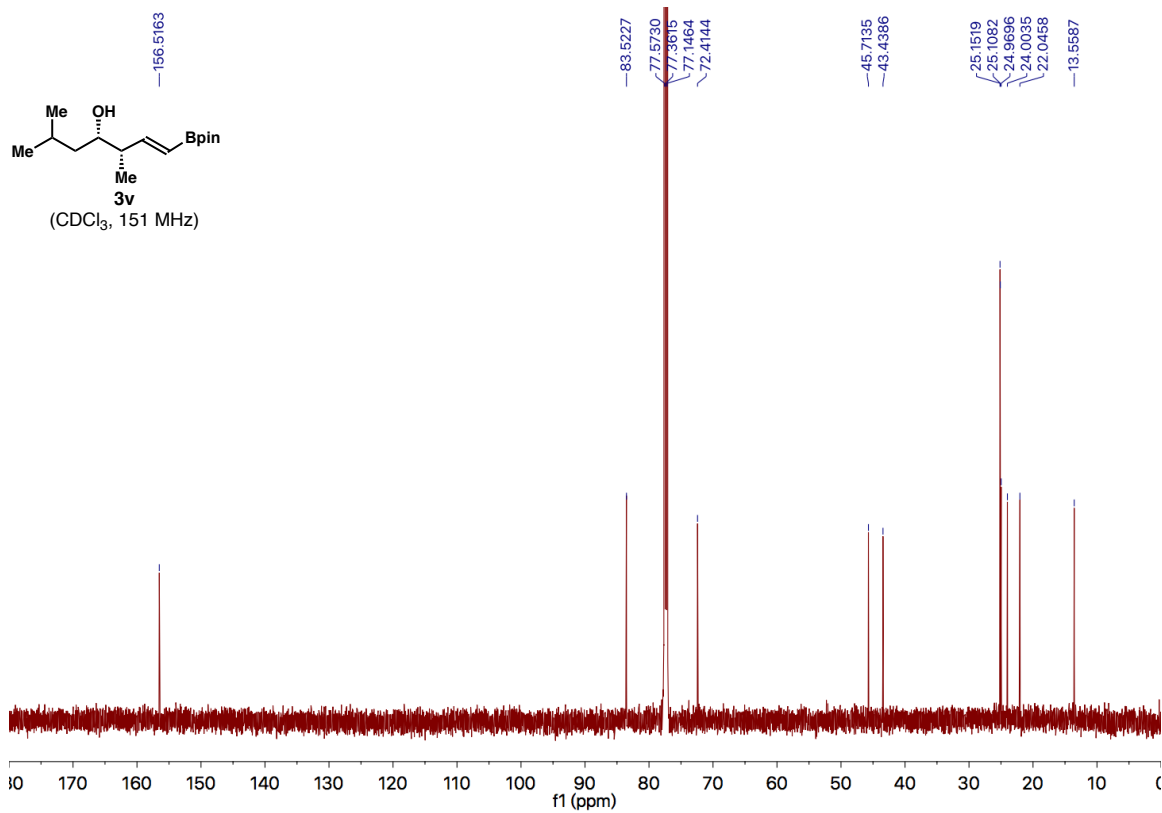



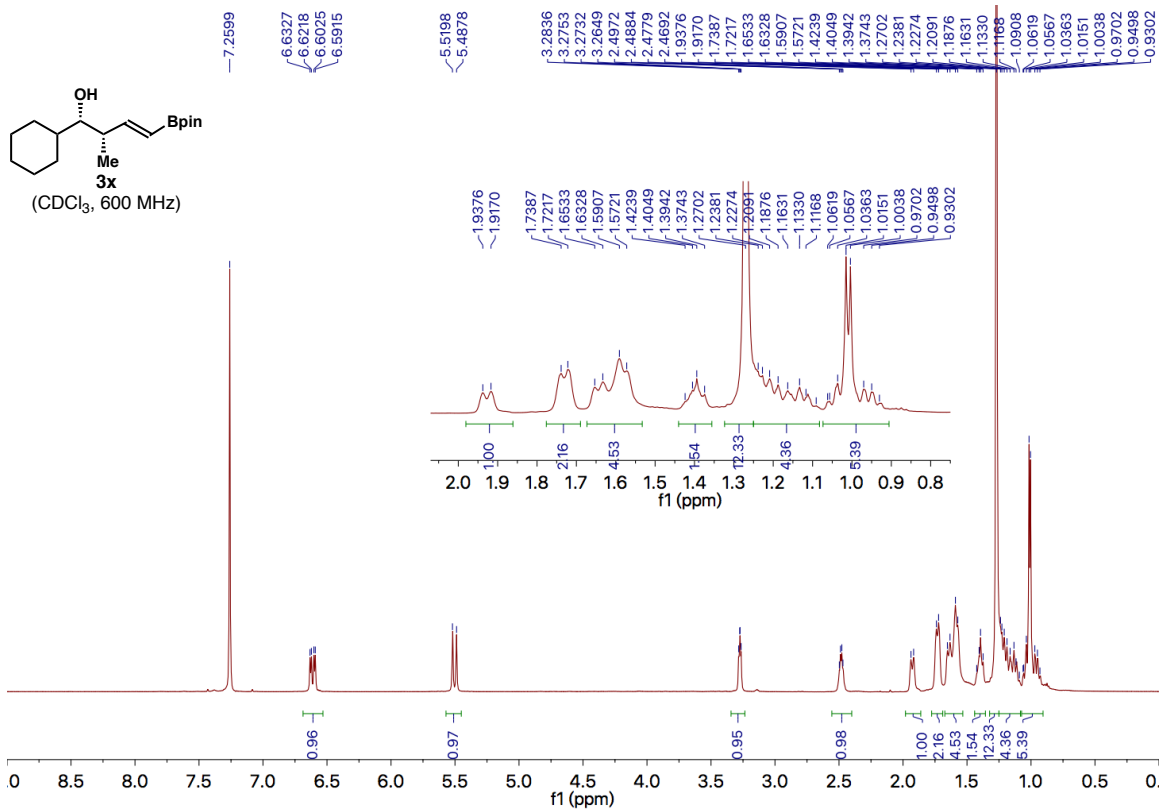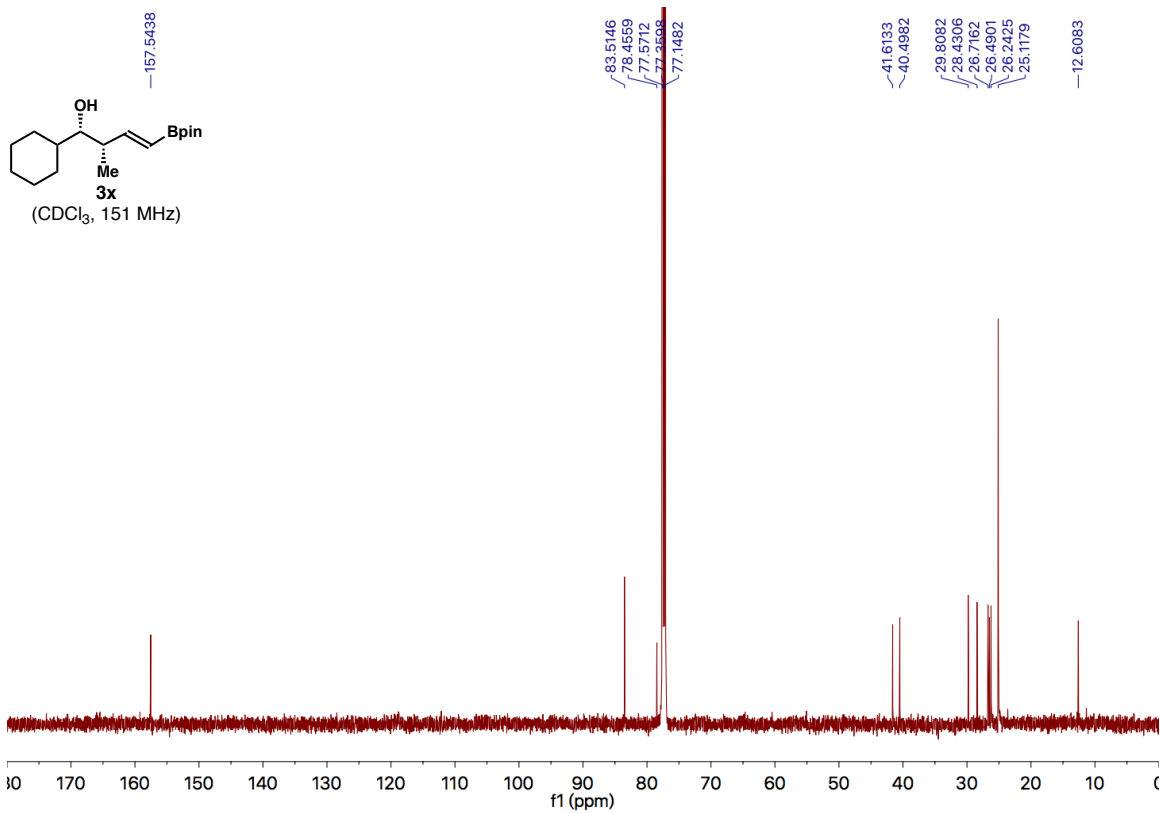

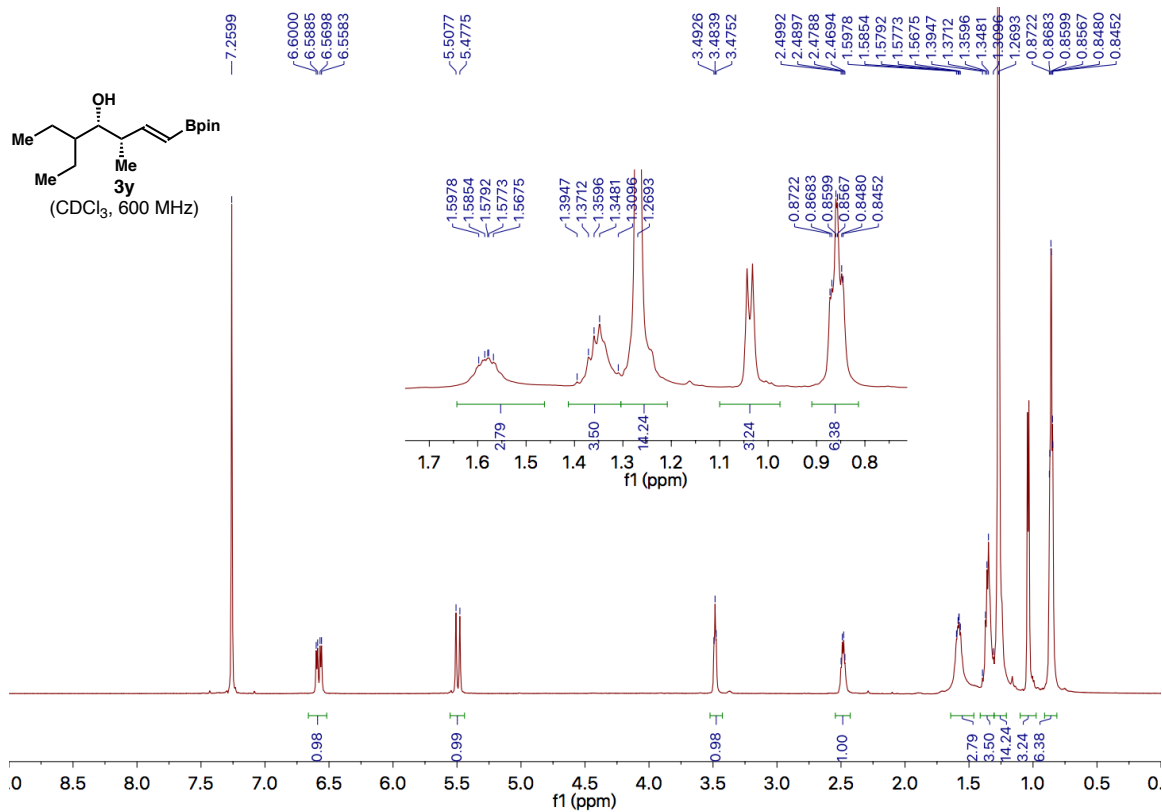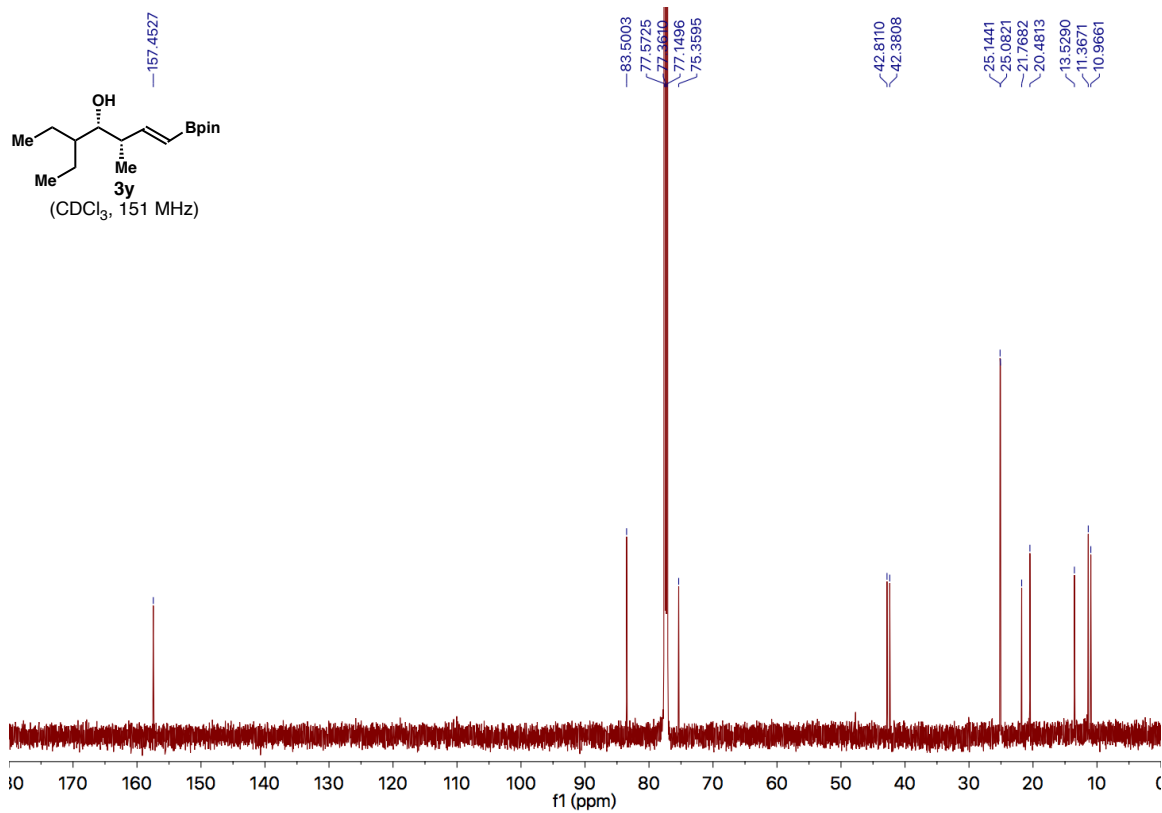

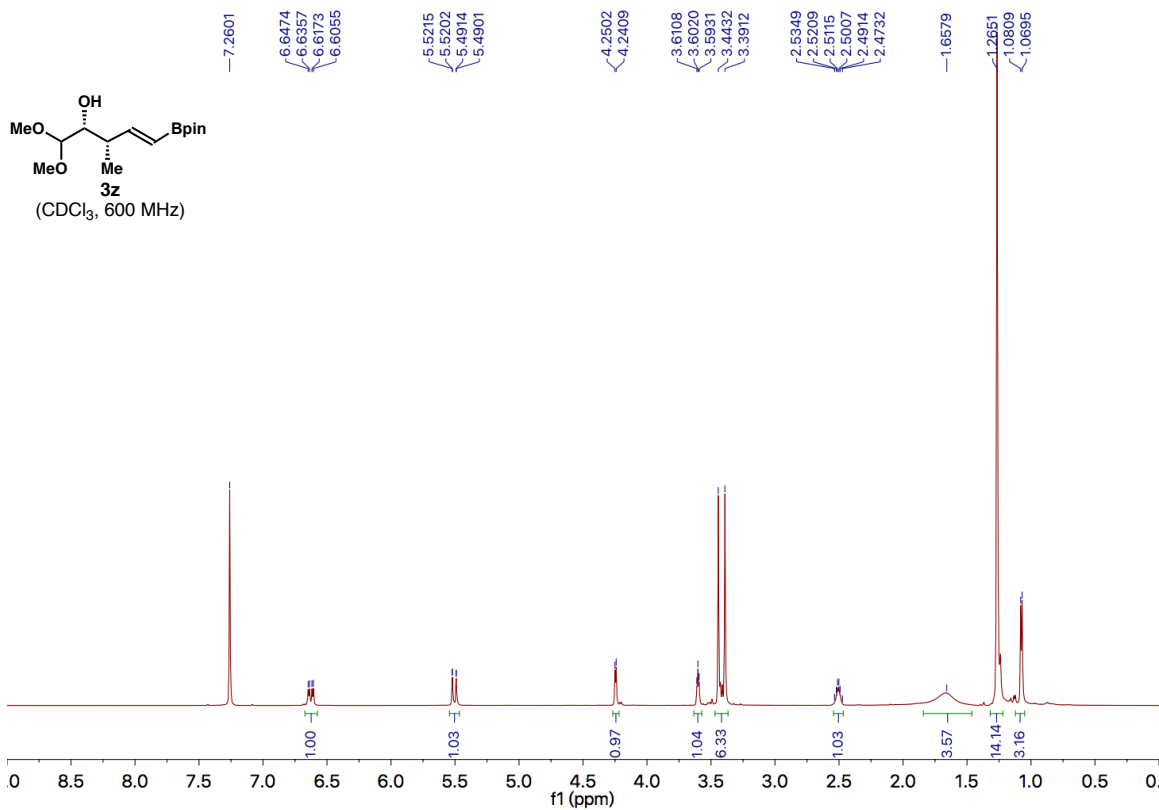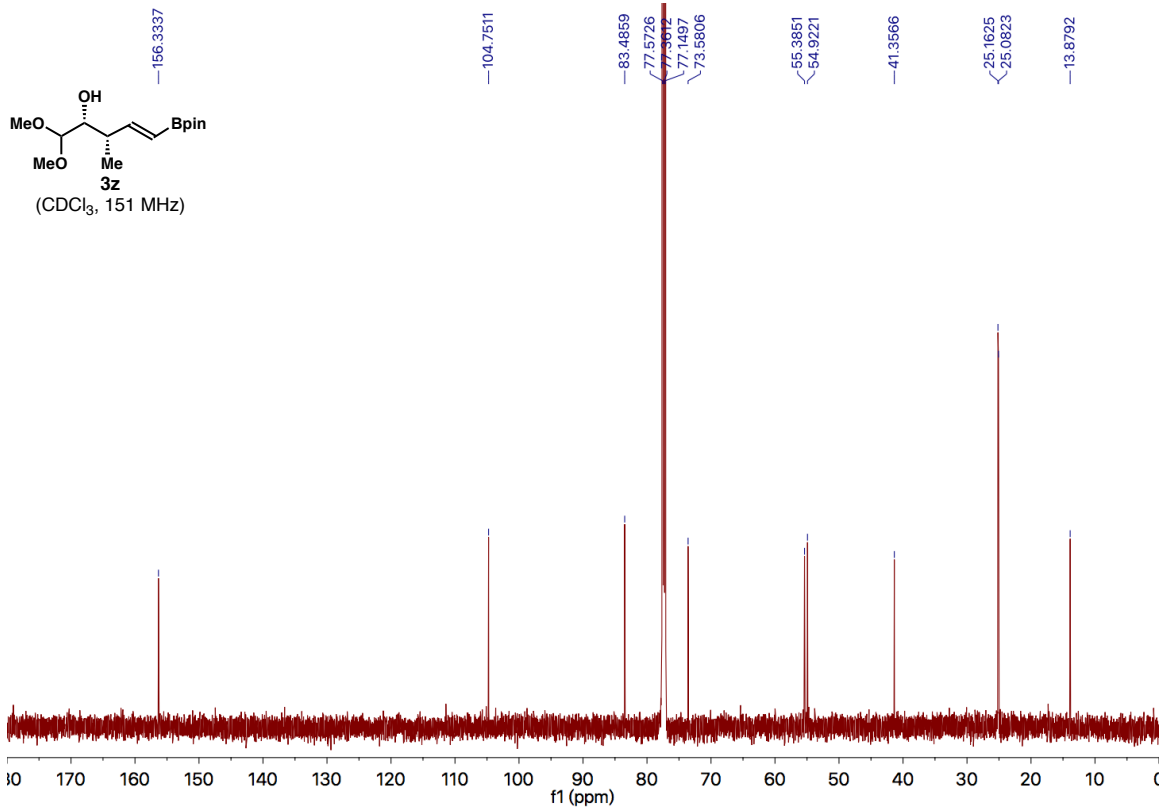

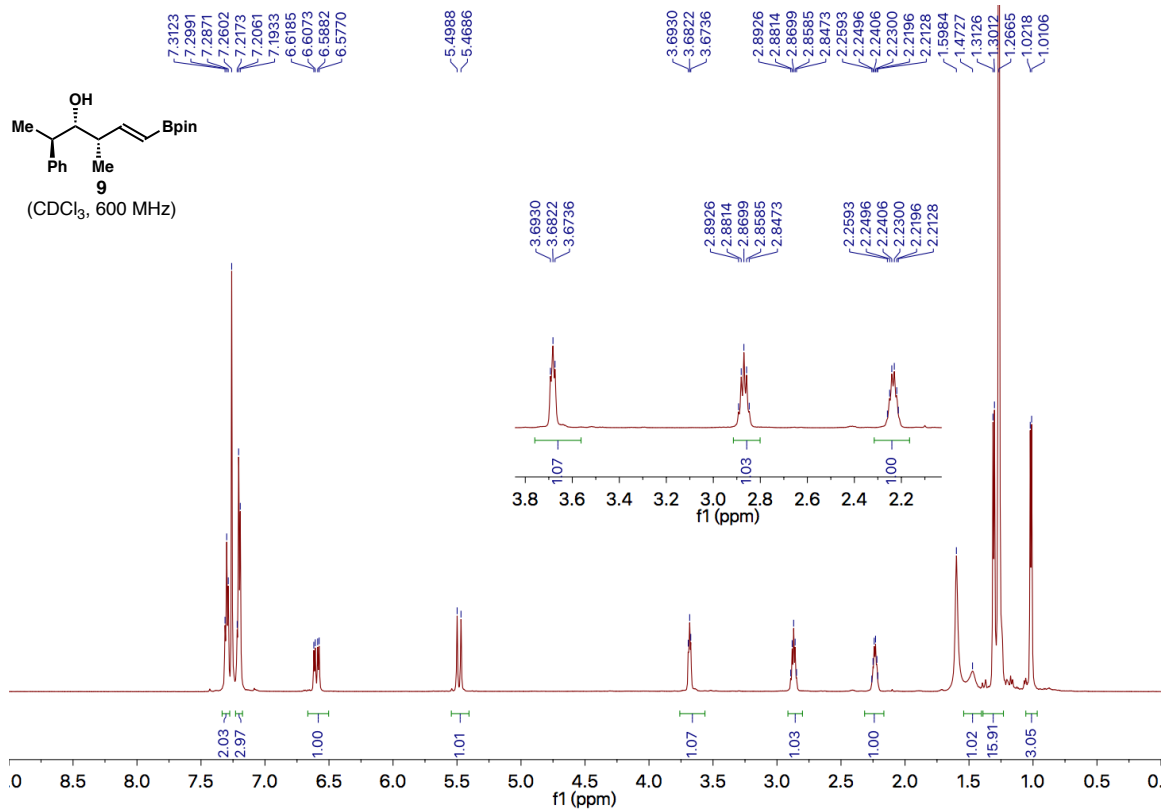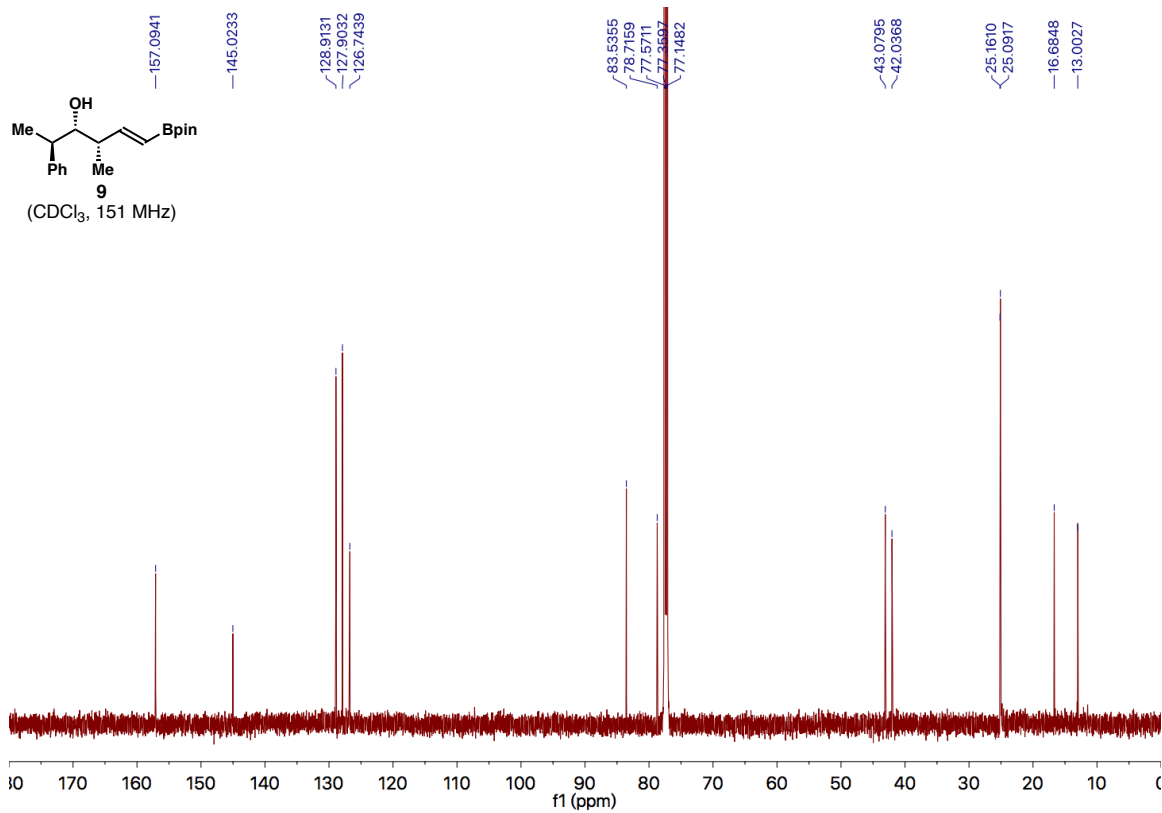

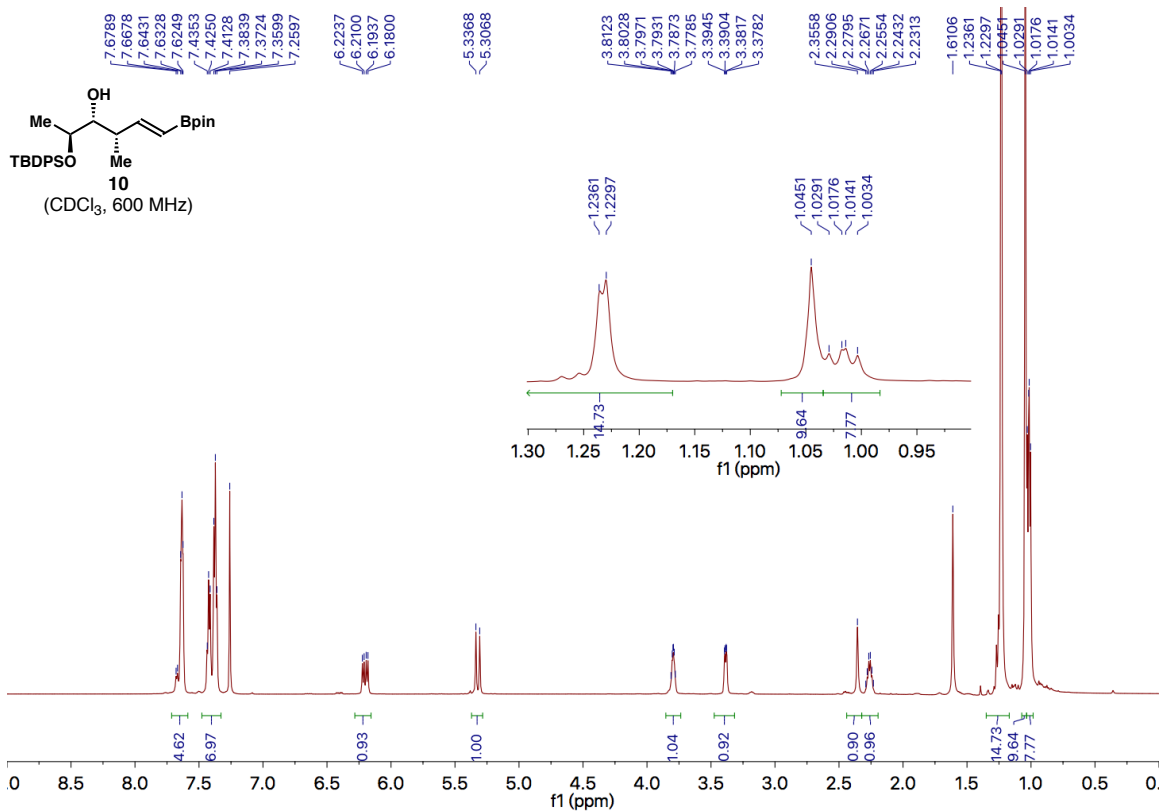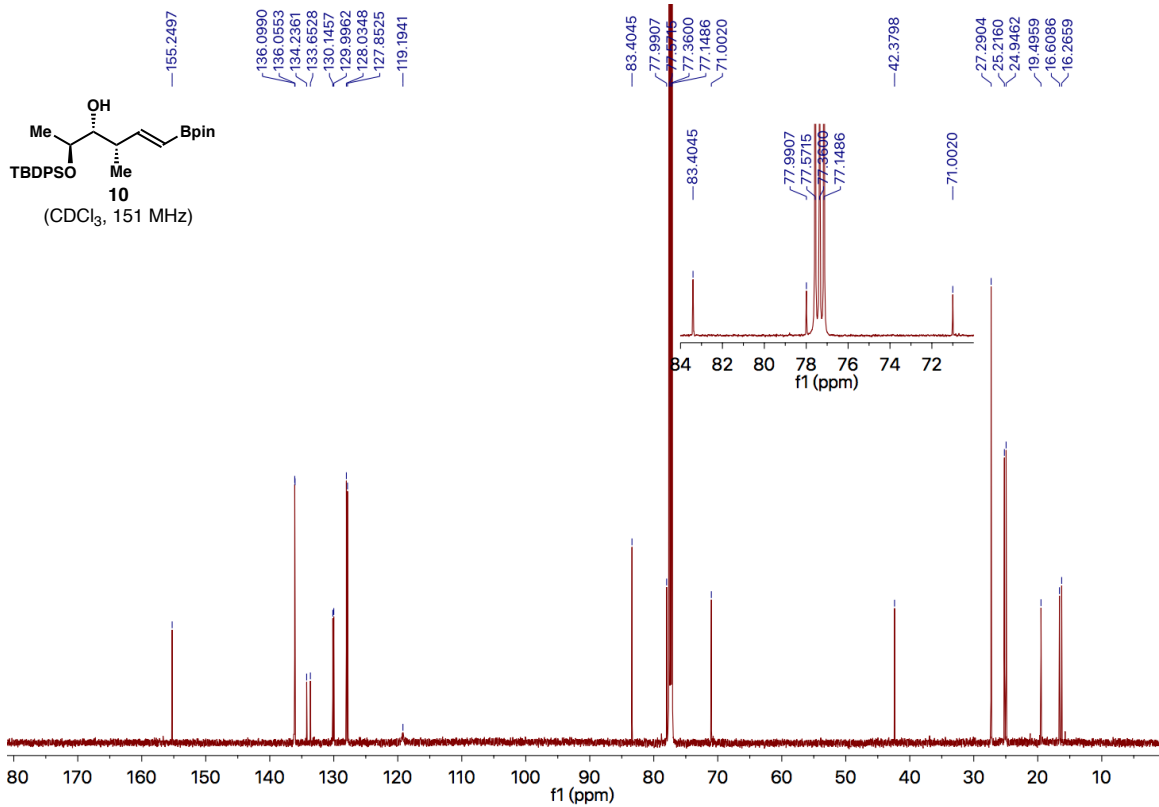

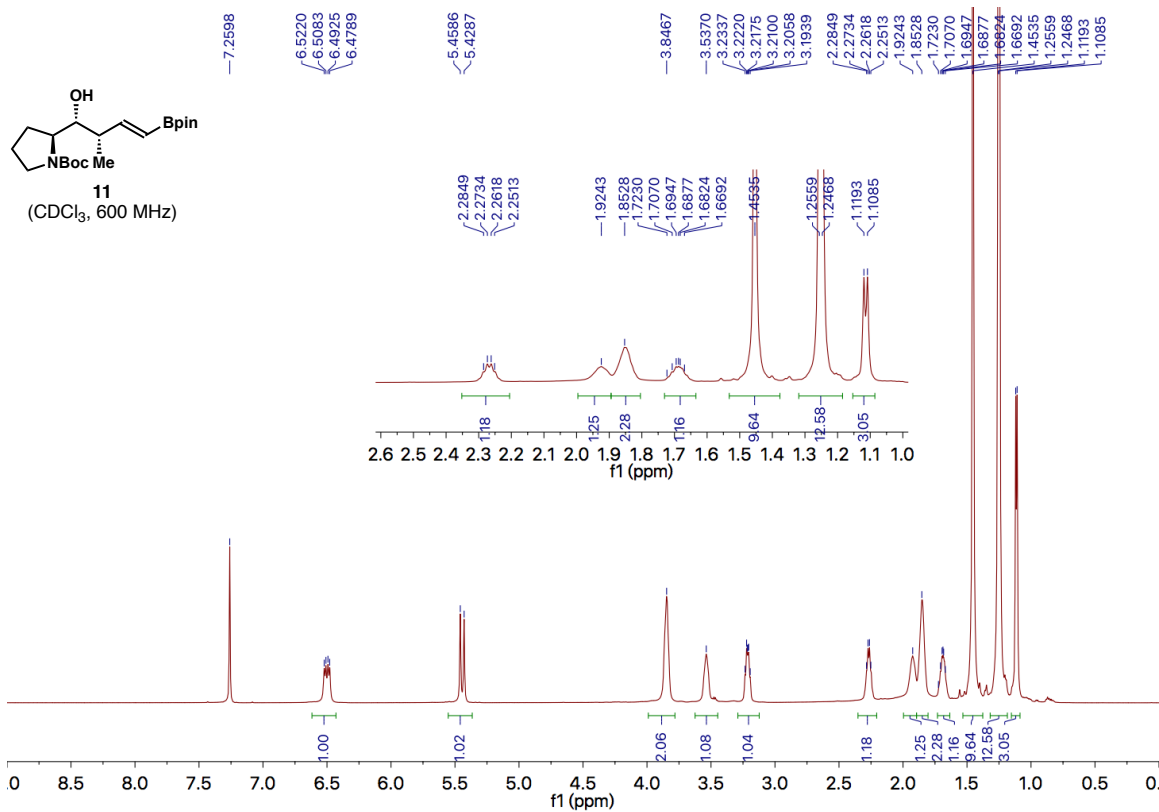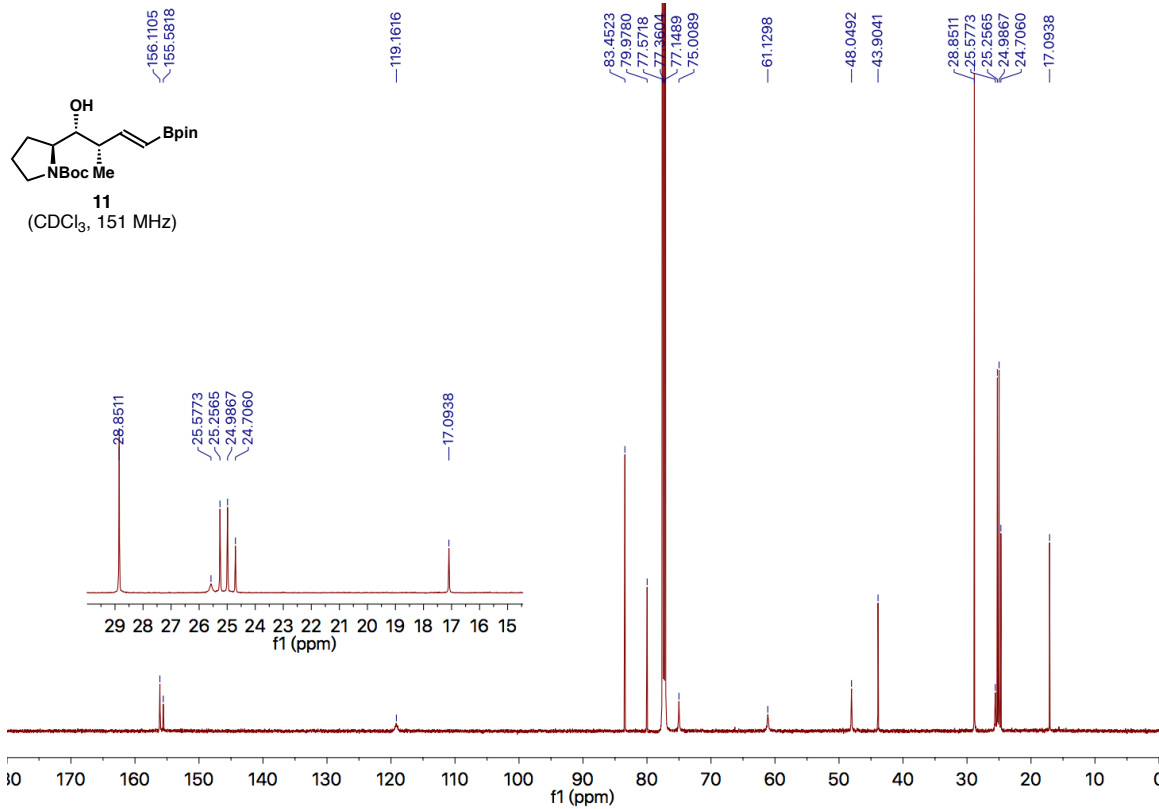



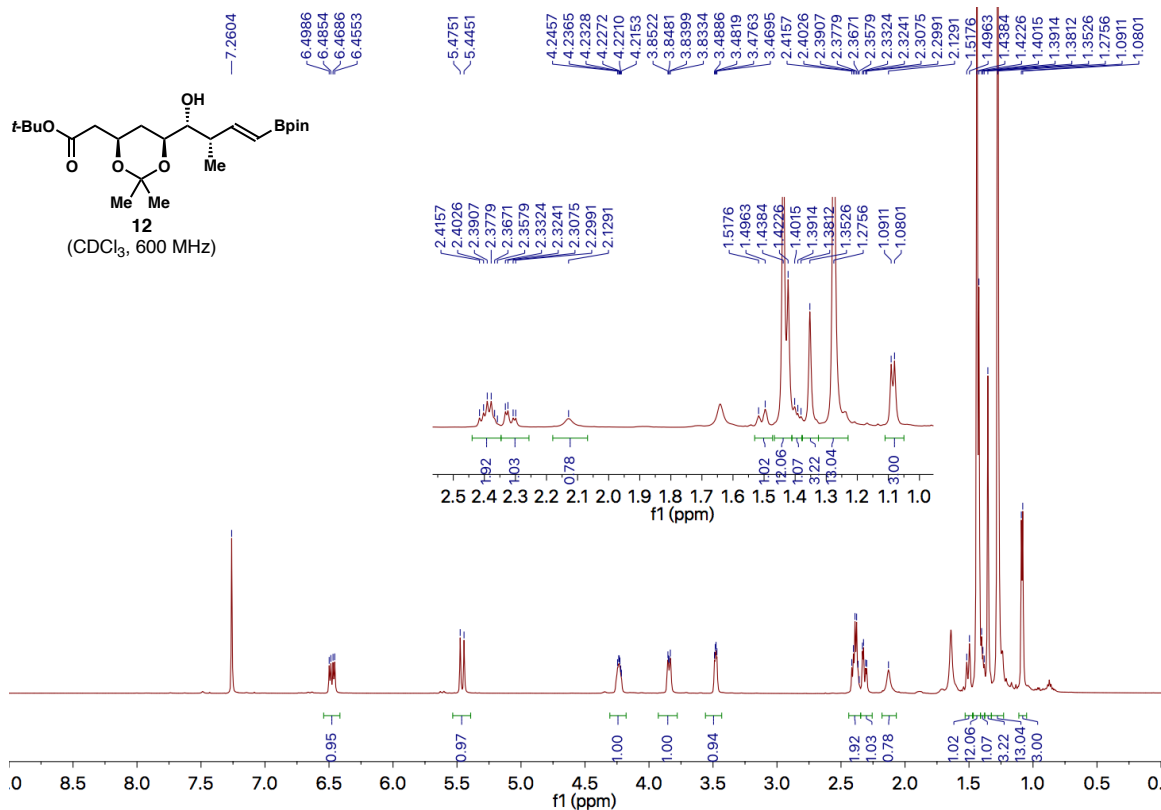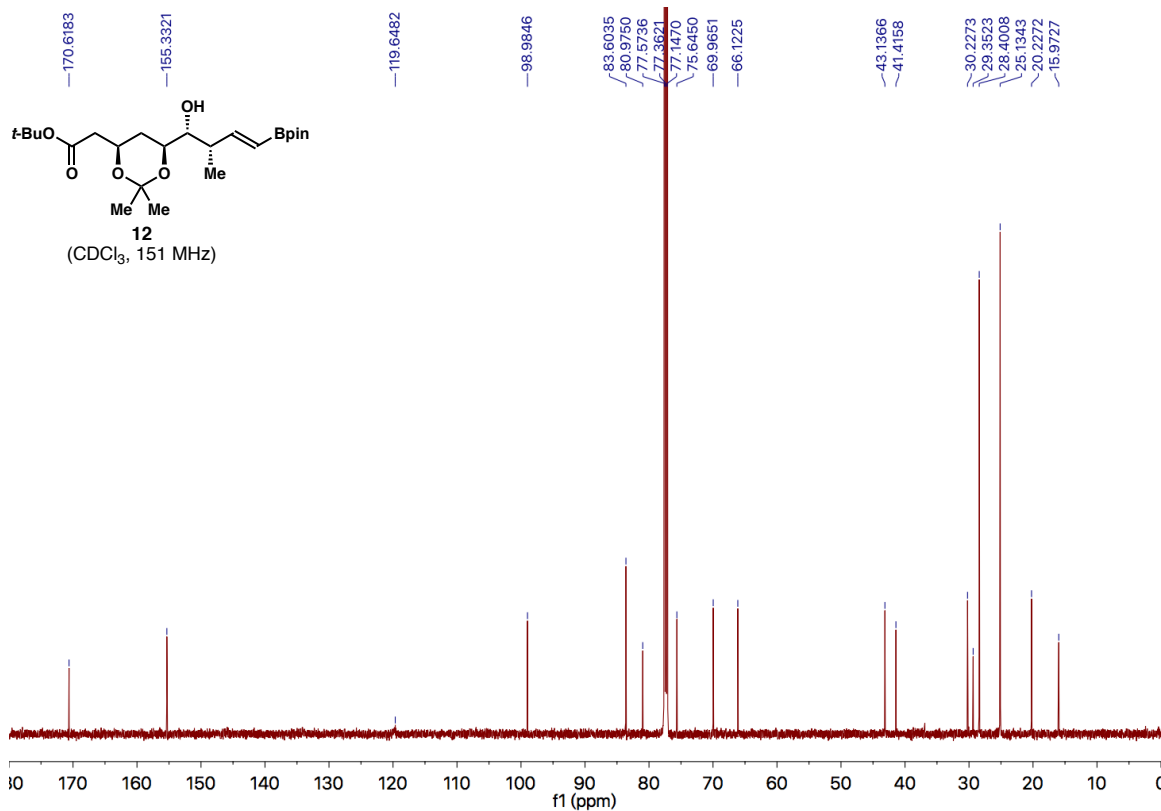

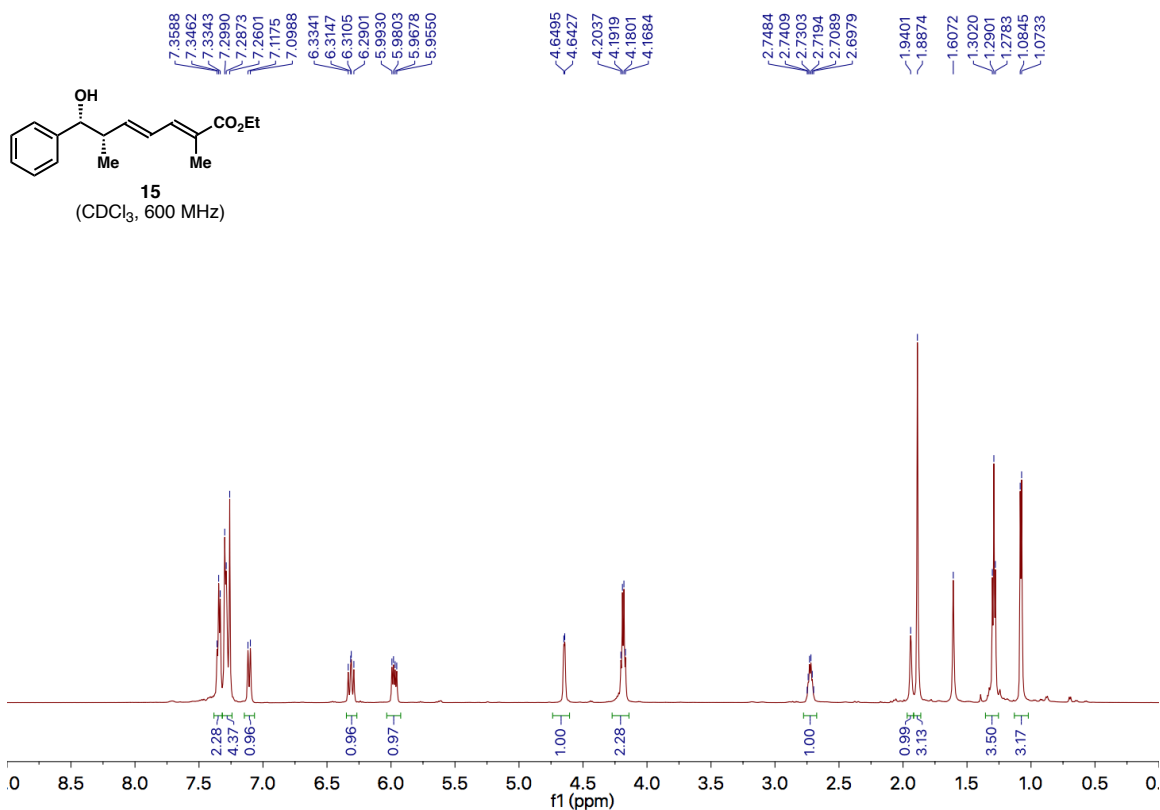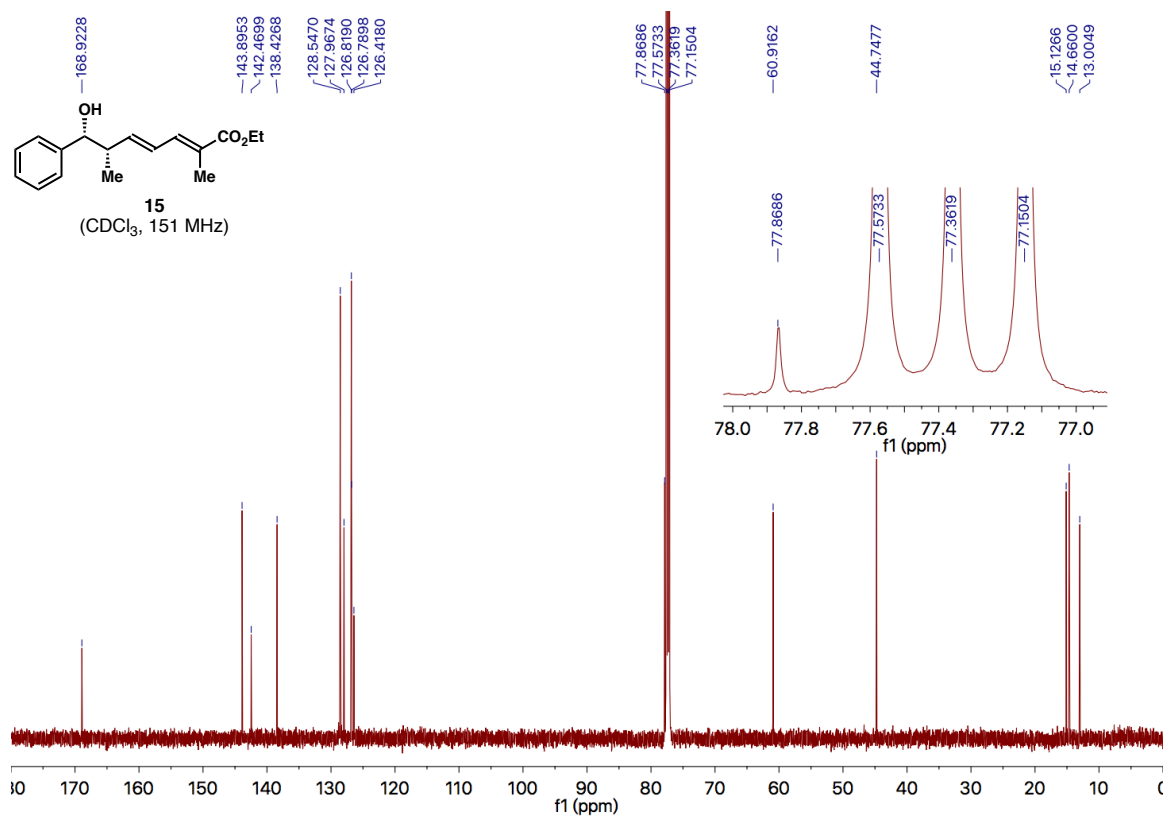

Supplement: c9sc00226j1.pdf [file c9sc00226j1.pdf]
